# Supplementary material for: A Genome-Wide Association Study of Serum Metabolite Profiles in Septic Shock Patients
Source: PubMed Central journal article supplement — Crit Care Explor. 2024 Jan 17;6(1):e1030. doi: 10.1097/CCE.0000000000001030 (PMC10796137; doi:10.1097/cce.0000000000001030), 2024-01-17
Supplement: cc9-6-e1030-s001.pdf [file cc9-6-e1030-s001.pdf]

## Supplementary Contents

|                                                                                  |           |
|----------------------------------------------------------------------------------|-----------|
| <b>Supplementary Methods</b>                                                     | <b>2</b>  |
| <b>S1. Inclusion/exclusion criteria</b>                                          | <b>2</b>  |
| <b>S2. GWAS QC</b>                                                               | <b>3</b>  |
| <b>Supplementary Figures</b>                                                     | <b>4</b>  |
| <b>S1-S20. QQ-plots</b>                                                          | <b>4</b>  |
| <b>S21-S40. Manhattan plots</b>                                                  | <b>24</b> |
| <b>Supplementary Tables</b>                                                      | <b>34</b> |
| <b>S1. Identified metabolites NMR resonance</b>                                  | <b>34</b> |
| <b>S2. Metabolite sample sizes</b>                                               | <b>35</b> |
| <b>S3. Genetic inflation factors</b>                                             | <b>35</b> |
| <b>S4. Genome-wide significant lead SNPs imputation information</b>              | <b>36</b> |
| <b>S5. Lead SNPs with suggestive significance</b>                                | <b>36</b> |
| <b>S6. Look-up with clinical GWAS outcomes</b>                                   | <b>49</b> |
| <b>S7. Metabolite replication previous GWAS</b>                                  | <b>50</b> |
| <b>S8. Studies included for metabolite GWAS replication</b>                      | <b>83</b> |
| <b>S9. Metabolite and clinical variable logistic regression</b>                  | <b>83</b> |
| <b>S10. Metabolite and clinical variable logistic regression with covariates</b> | <b>85</b> |
| <b>S11. Power analysis for continuous outcome</b>                                | <b>87</b> |
| <b>S12. Power analysis for binary outcome</b>                                    | <b>88</b> |
| <b>Supplementary References</b>                                                  | <b>89</b> |

## Supplementary Methods

### Supplementary Method S1. Inclusion/Exclusion Criteria

ADRENAL trial recruitment has been previously described by Venkatesh et al. (2018). Participants included adult septic shock patients from 69 intensive care units (ICUs) across Australia, the United Kingdom, New Zealand, Saudi Arabia, and Denmark (n = 3658) that were recruited from 2013 to 2017 into a double-blind, randomised, controlled trial (RCT) designed to examine the efficacy of hydrocortisone on septic shock. The inclusion criteria for eligible participants were:

1. Aged 18 years or older
2. Documented site of infection or strong suspicion of infection
3. Two of the four clinical signs of inflammation:
  - I. Core temperature > 38°C or < 36°C
  - II. Heart rate > 90 beats per minute
  - III. Respiratory rate > 20 breaths per minute, or PaCO<sub>2</sub> < 32 mmHg, or mechanical ventilation
  - IV. White cell count > 12×10<sup>9</sup>/L or < 4×10<sup>9</sup>/L or > 10% immature neutrophils
4. Treatment with mechanical ventilation at the time of randomization (including both via the presence of an endotracheal tube or a non-invasive ventilation with bi-level of continuous positive airway pressure)
5. Treatment with continuous vasopressors or inotropes to maintain a systolic blood pressure > 90 mmHg, or a mean arterial blood pressure (MAP) > 60 mmHg, or a MAP target set by the treating clinician for maintaining perfusion
6. Administration of vasopressors or inotropes for ≥ 4 hours and present at time of randomization

The exclusion criteria for eligible participants were:

1. Met all inclusion criteria more than 24 hours ago
2. Clinician expects to prescribe systemic corticosteroids for an indication other than septic shock (not including nebulised or inhaled corticosteroid)
3. Patients treated with etomidate
4. Patients receiving treatment with Amphotericin B for systemic fungal infections at time of randomization
5. Patients with documented cerebral malaria at time of randomization
6. Patients with documented strongyloides infection at the time of randomization
7. Death is deemed inevitable or imminent during this admission and either the attending physician, patient, or surrogate legal decision maker are not committed to active treatment
8. Death from underlying disease is likely within 90 days
9. Patient has been previously enrolled in the ADRENAL trial

Patients were assigned to receive either 200 mg/day of intravenous hydrocortisone (n = 1832) or a placebo (n = 1826) for seven days or until death/discharge from the ICU.

## Supplementary Method S2. GWAS QC

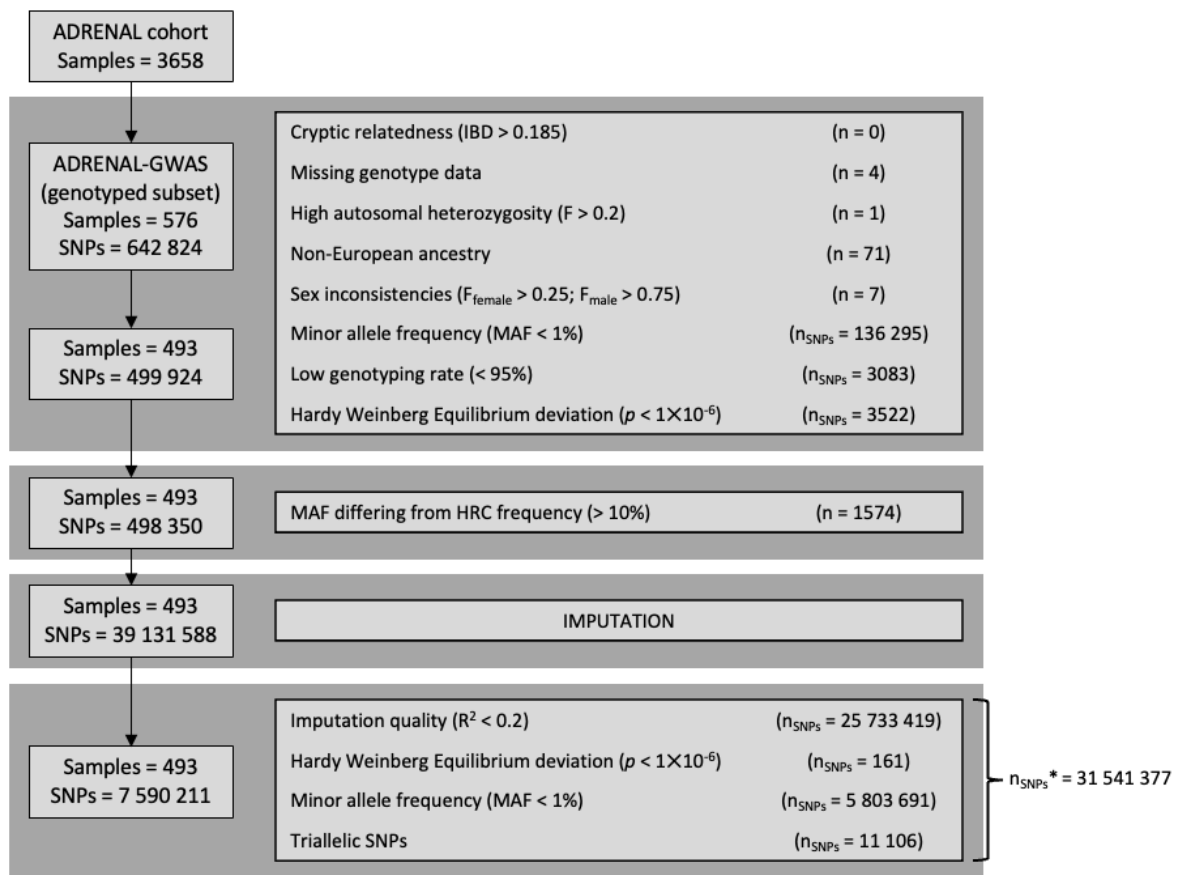

\*QC step was performed as a single step with SNP exclusion overlap present across the different QC criteria

## Supplementary Figures

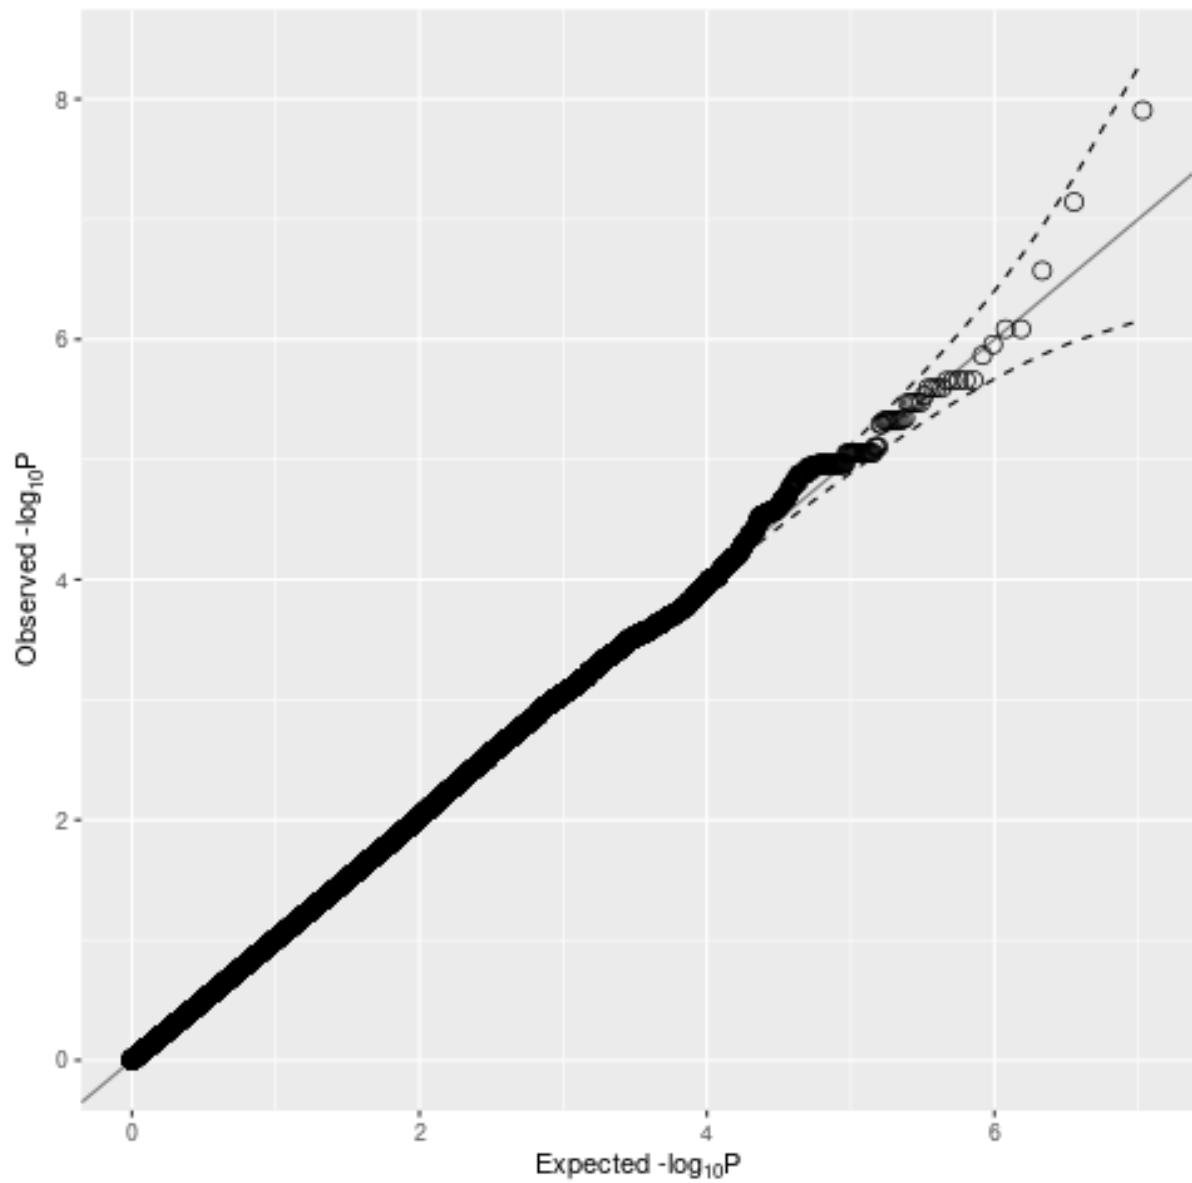

**Supplementary Figure S1.** Quantile-Quantile plot for the 3-hydroxybutyrate GWAS. Comparison of observed and expected  $-\log_{10} p$ -values expected under the null distribution of no genetic association across the genome. The dotted line represents the pointwise 95% confidence interval expected under the null hypothesis of no association.

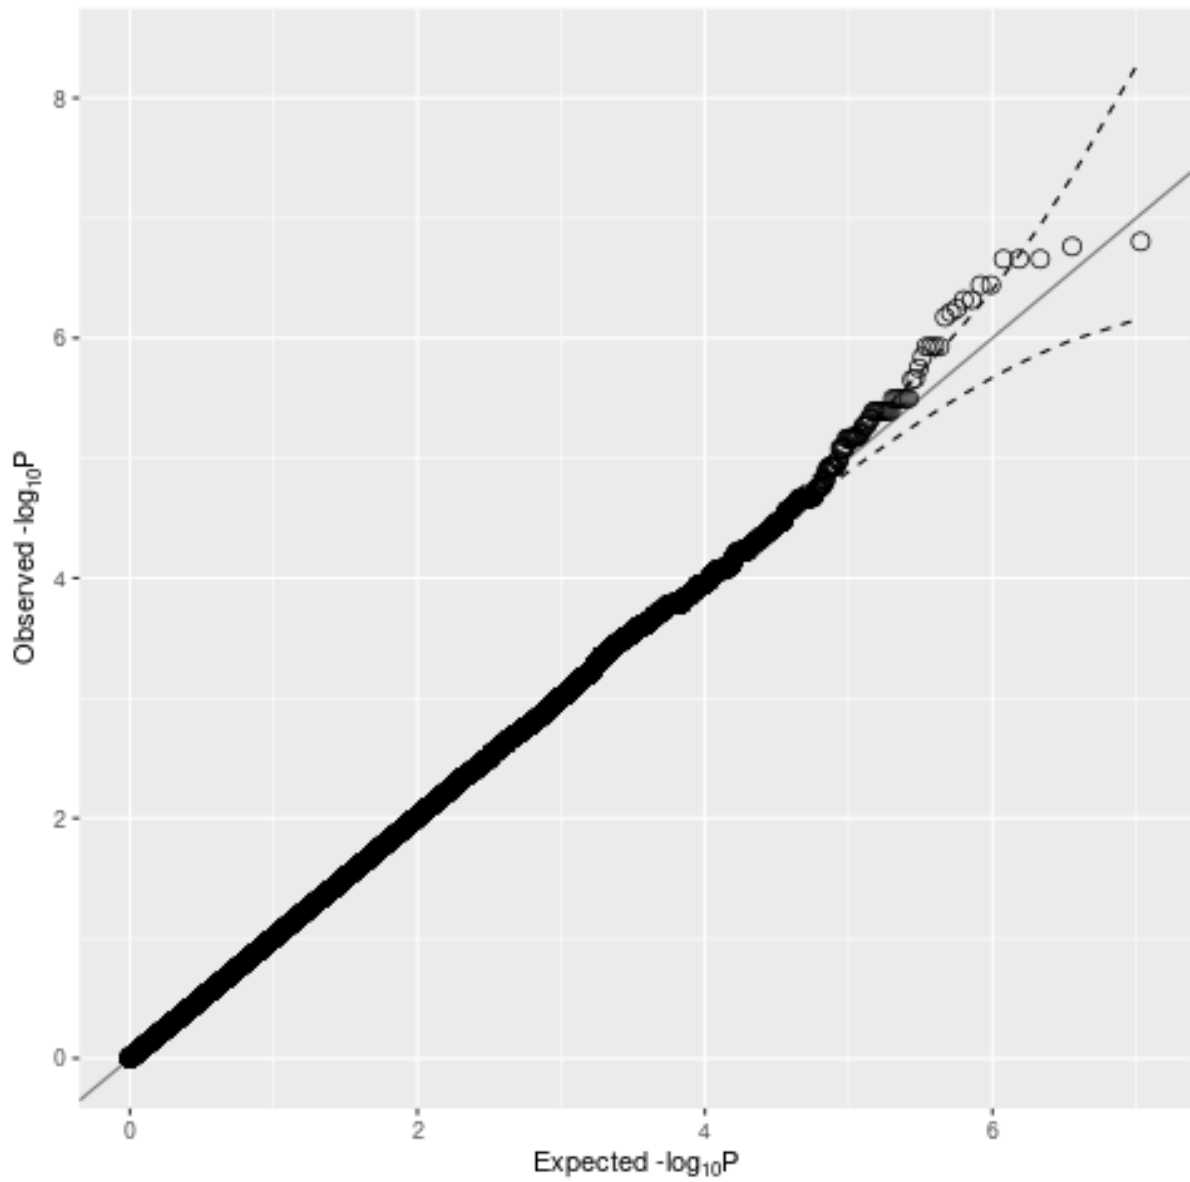

**Supplementary Figure S2.** Quantile-Quantile plot for the acetate GWAS. Comparison of observed and expected  $-\log_{10} p$ -values expected under the null distribution of no genetic association across the genome. The dotted line represents the pointwise 95% confidence interval expected under the null hypothesis of no association.

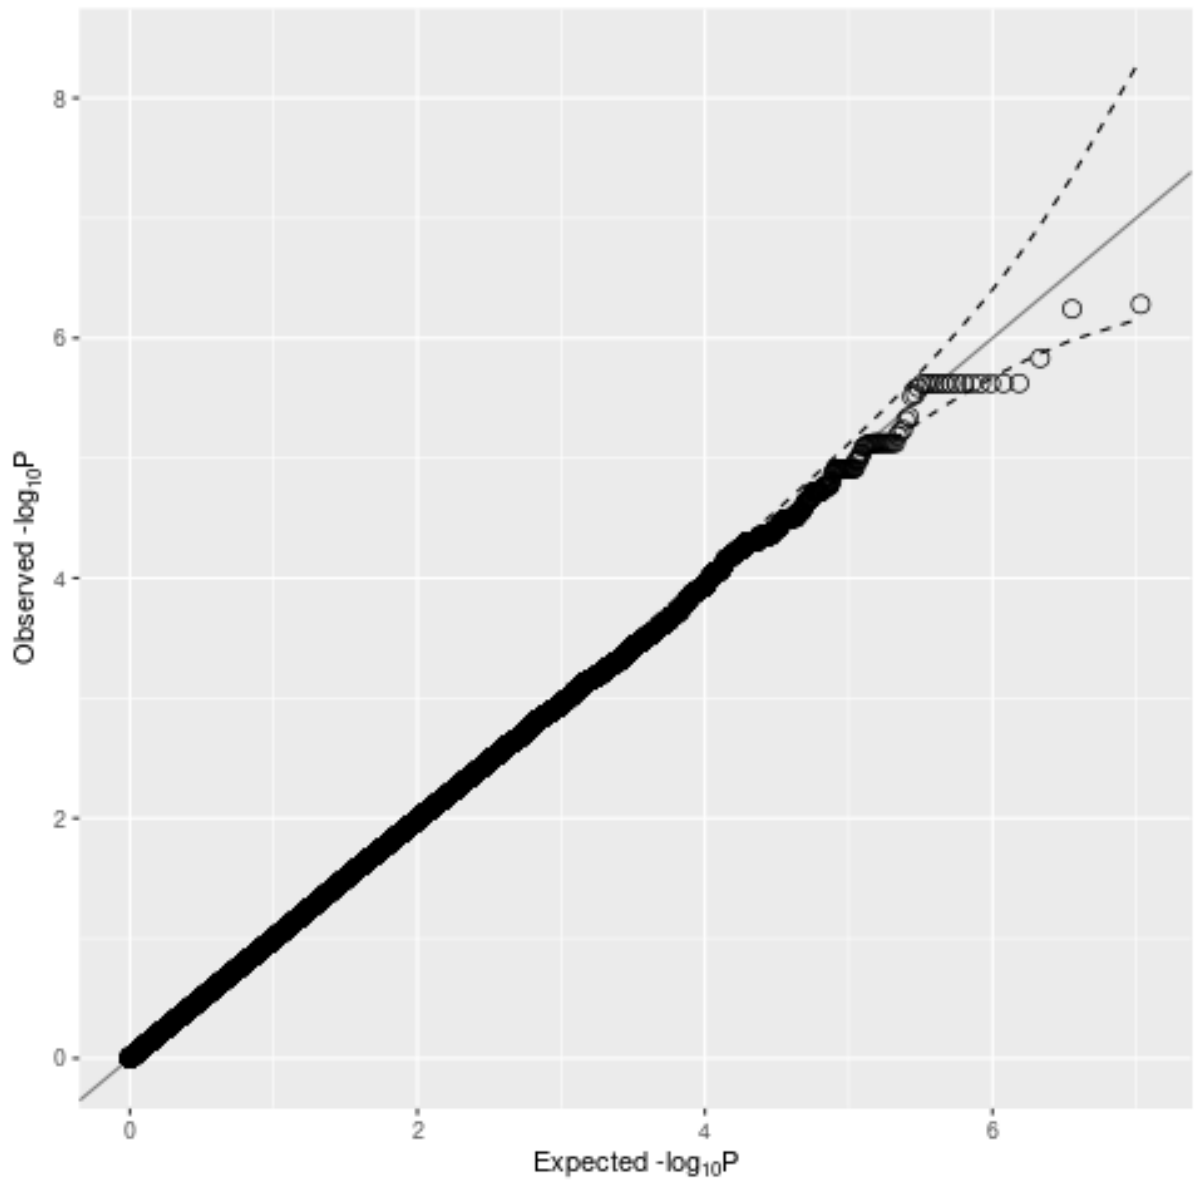

**Supplementary Figure S3.** Quantile-Quantile plot for the acetoacetate GWAS. Comparison of observed and expected  $-\log_{10} p$ -values expected under the null distribution of no genetic association across the genome. The dotted line represents the pointwise 95% confidence interval expected under the null hypothesis of no association.

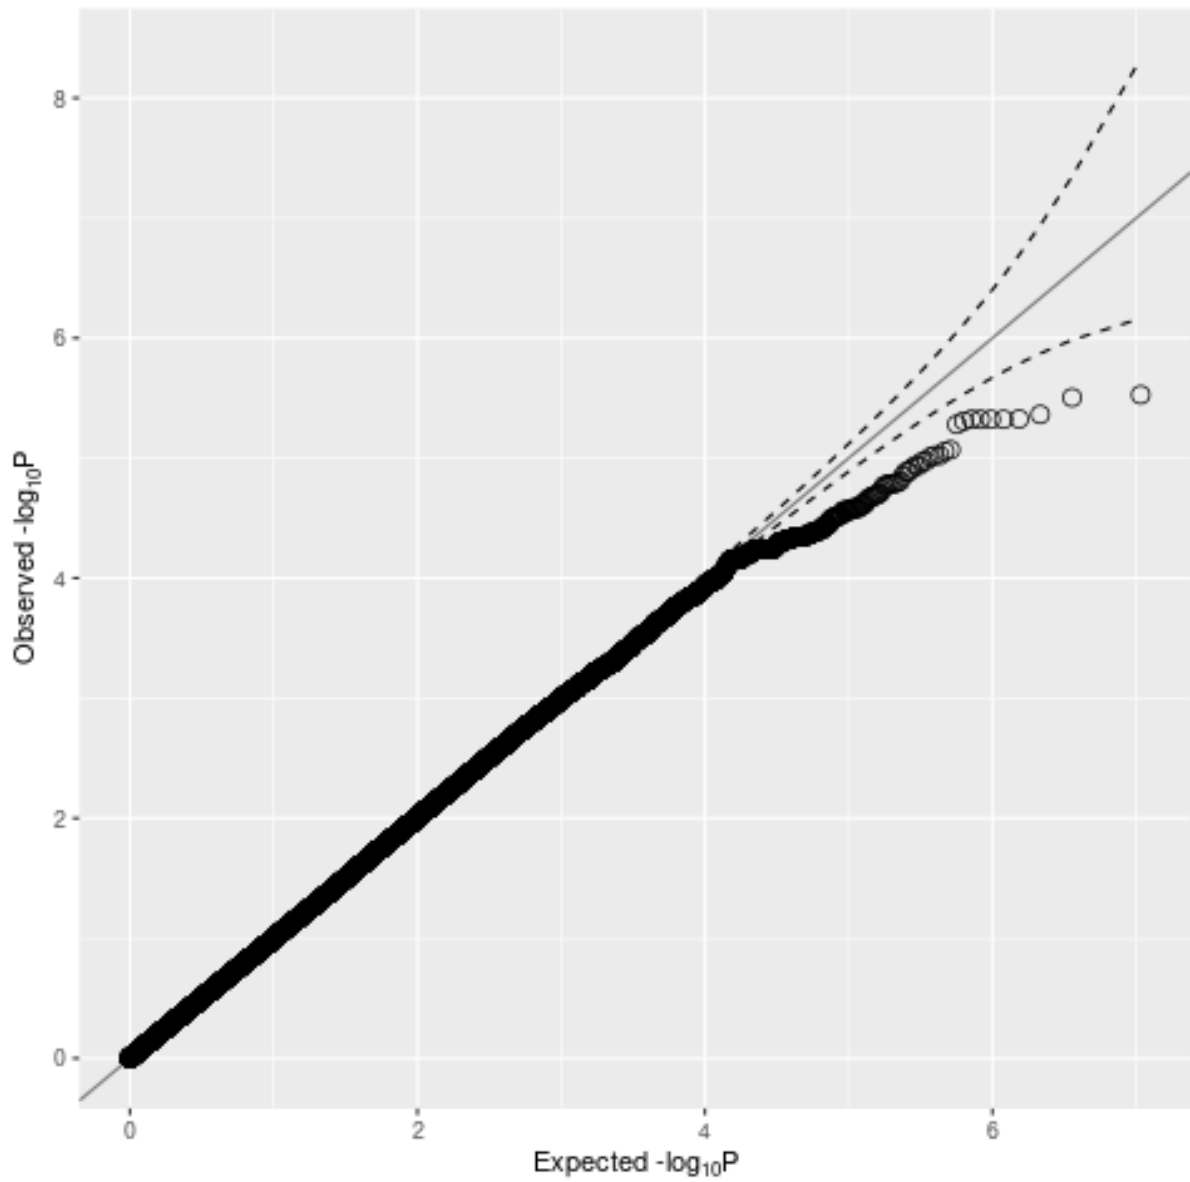

**Supplementary Figure S4.** Quantile-Quantile plot for the acetone GWAS. Comparison of observed and expected  $-\log_{10} p$ -values expected under the null distribution of no genetic association across the genome. The dotted line represents the pointwise 95% confidence interval expected under the null hypothesis of no association.

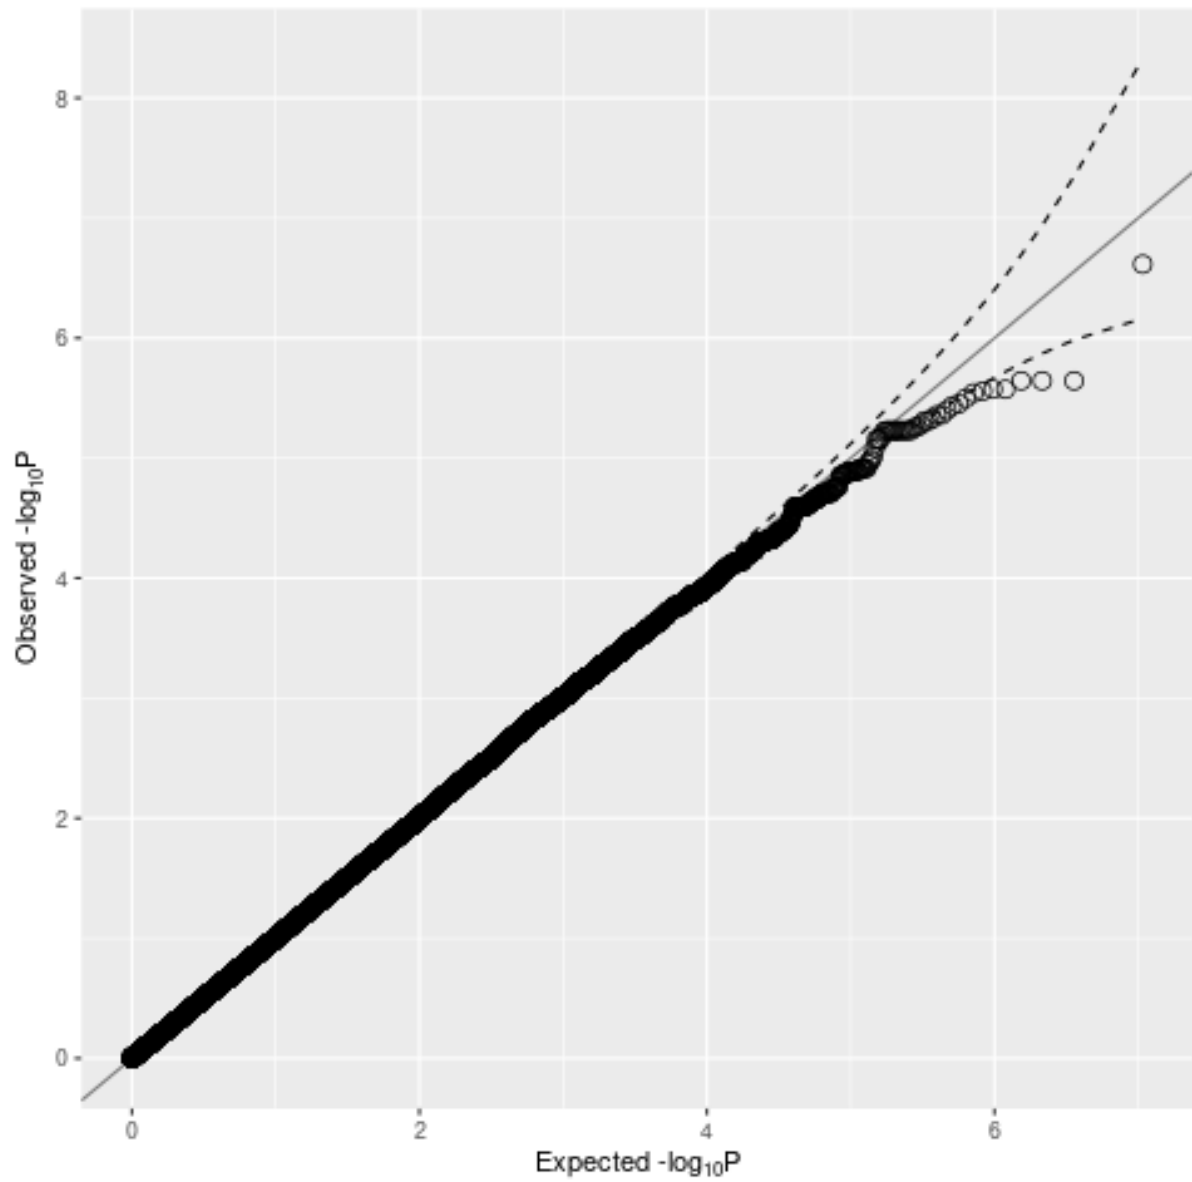

**Supplementary Figure S5.** Quantile-Quantile plot for the alanine GWAS. Comparison of observed and expected  $-\log_{10} p$ -values expected under the null distribution of no genetic association across the genome. The dotted line represents the pointwise 95% confidence interval expected under the null hypothesis of no association.



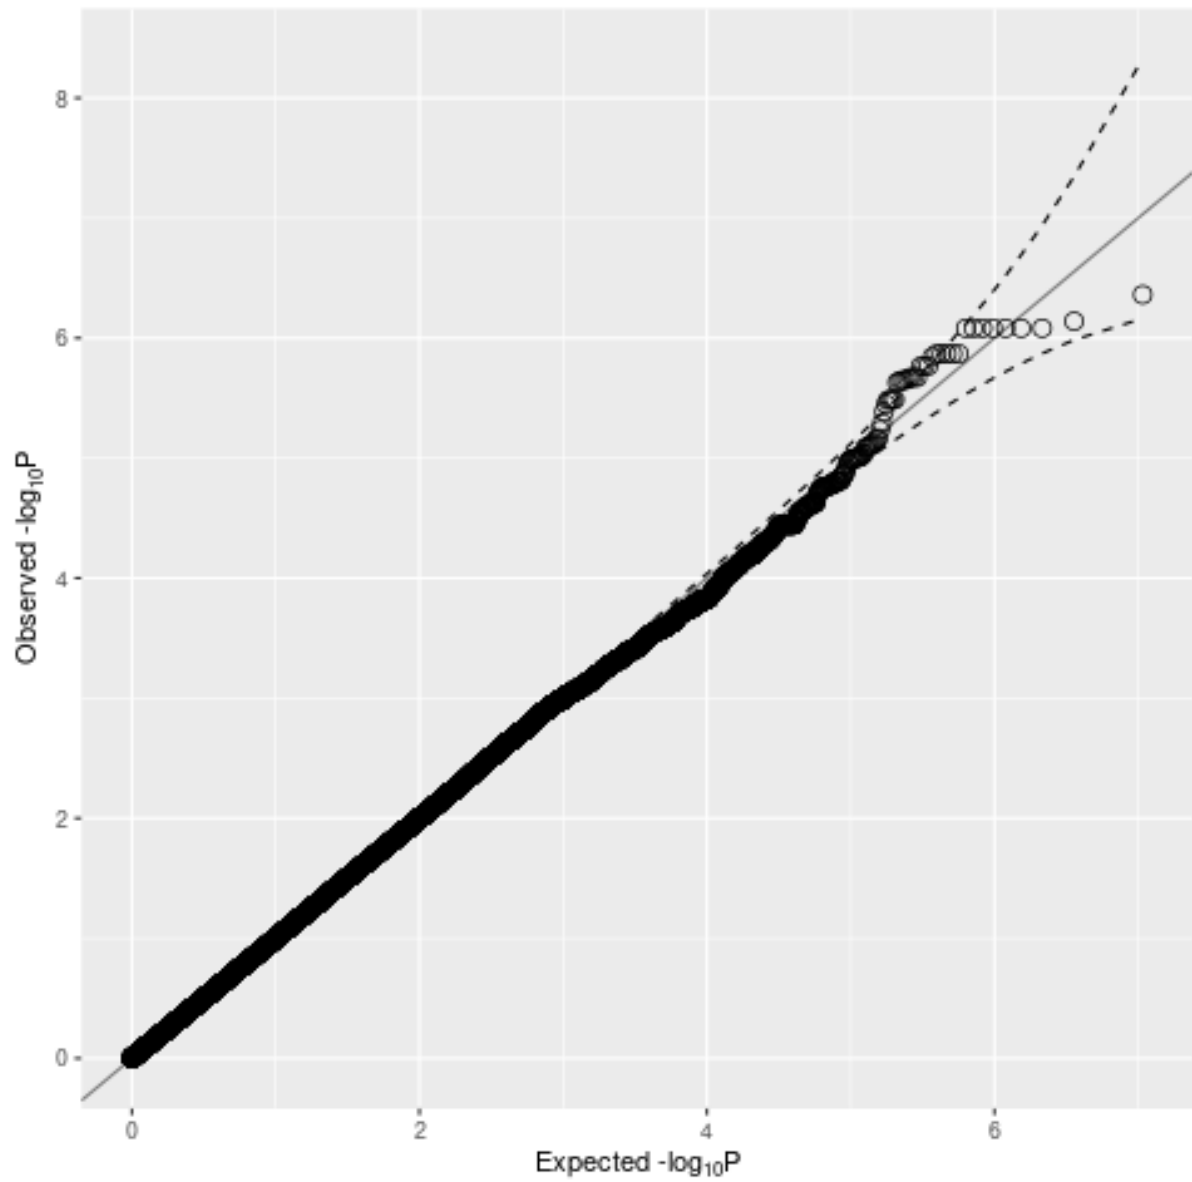

**Supplementary Figure S6.** Quantile-Quantile plot for the citrate GWAS. Comparison of observed and expected  $-\log_{10} p$ -values expected under the null distribution of no genetic association across the genome. The dotted line represents the pointwise 95% confidence interval expected under the null hypothesis of no association.

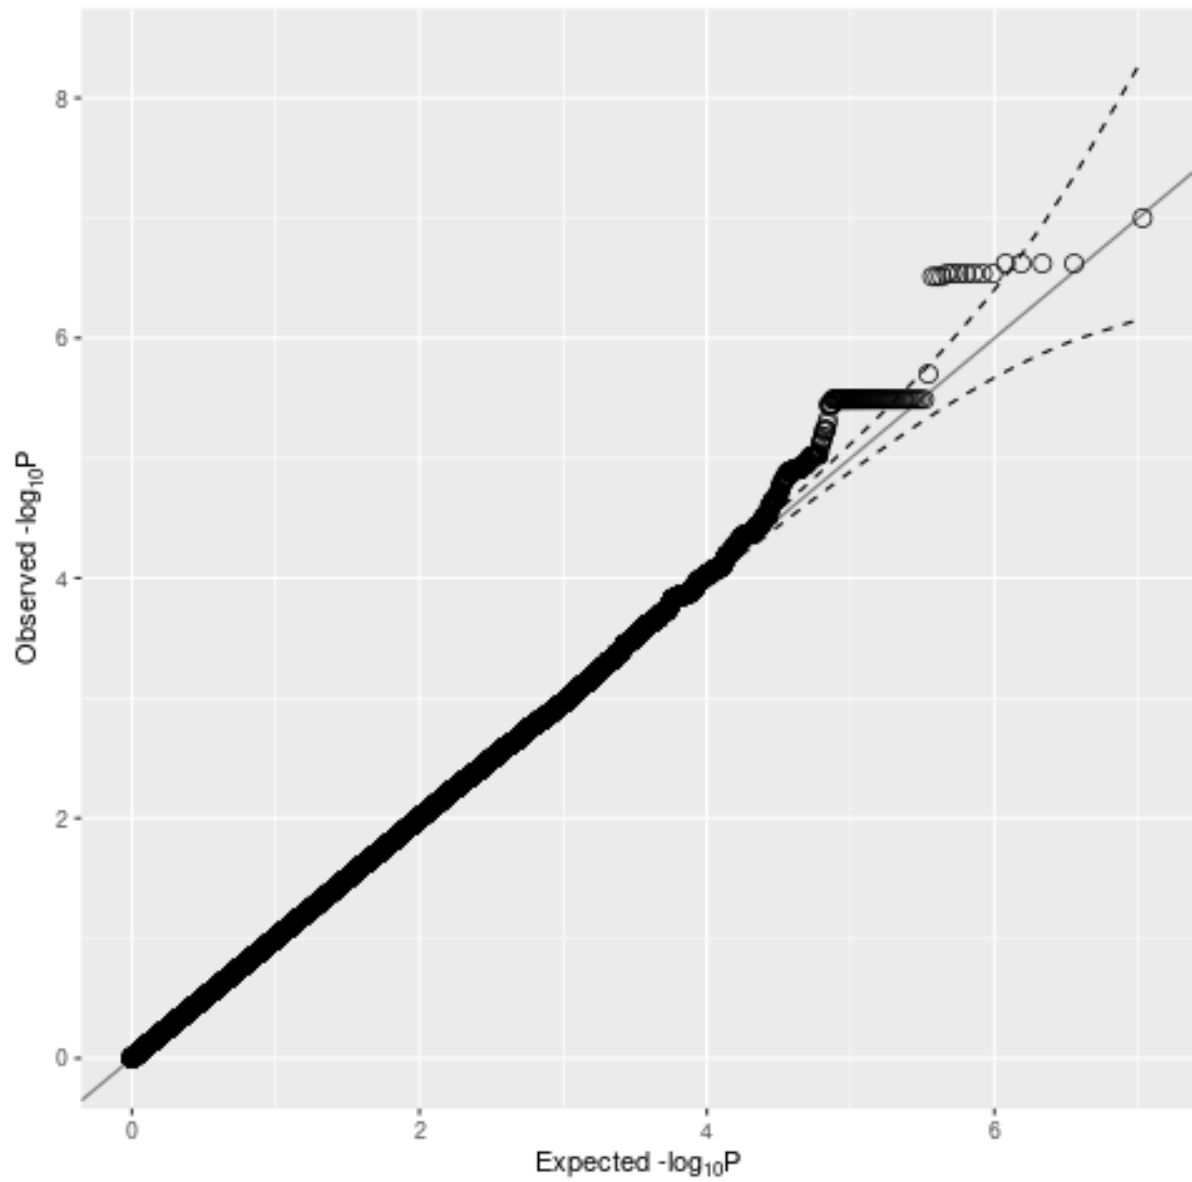

**Supplementary Figure S7.** Quantile-Quantile plot for the creatine GWAS. Comparison of observed and expected  $-\log_{10} p$ -values expected under the null distribution of no genetic association across the genome. The dotted line represents the pointwise 95% confidence interval expected under the null hypothesis of no association.

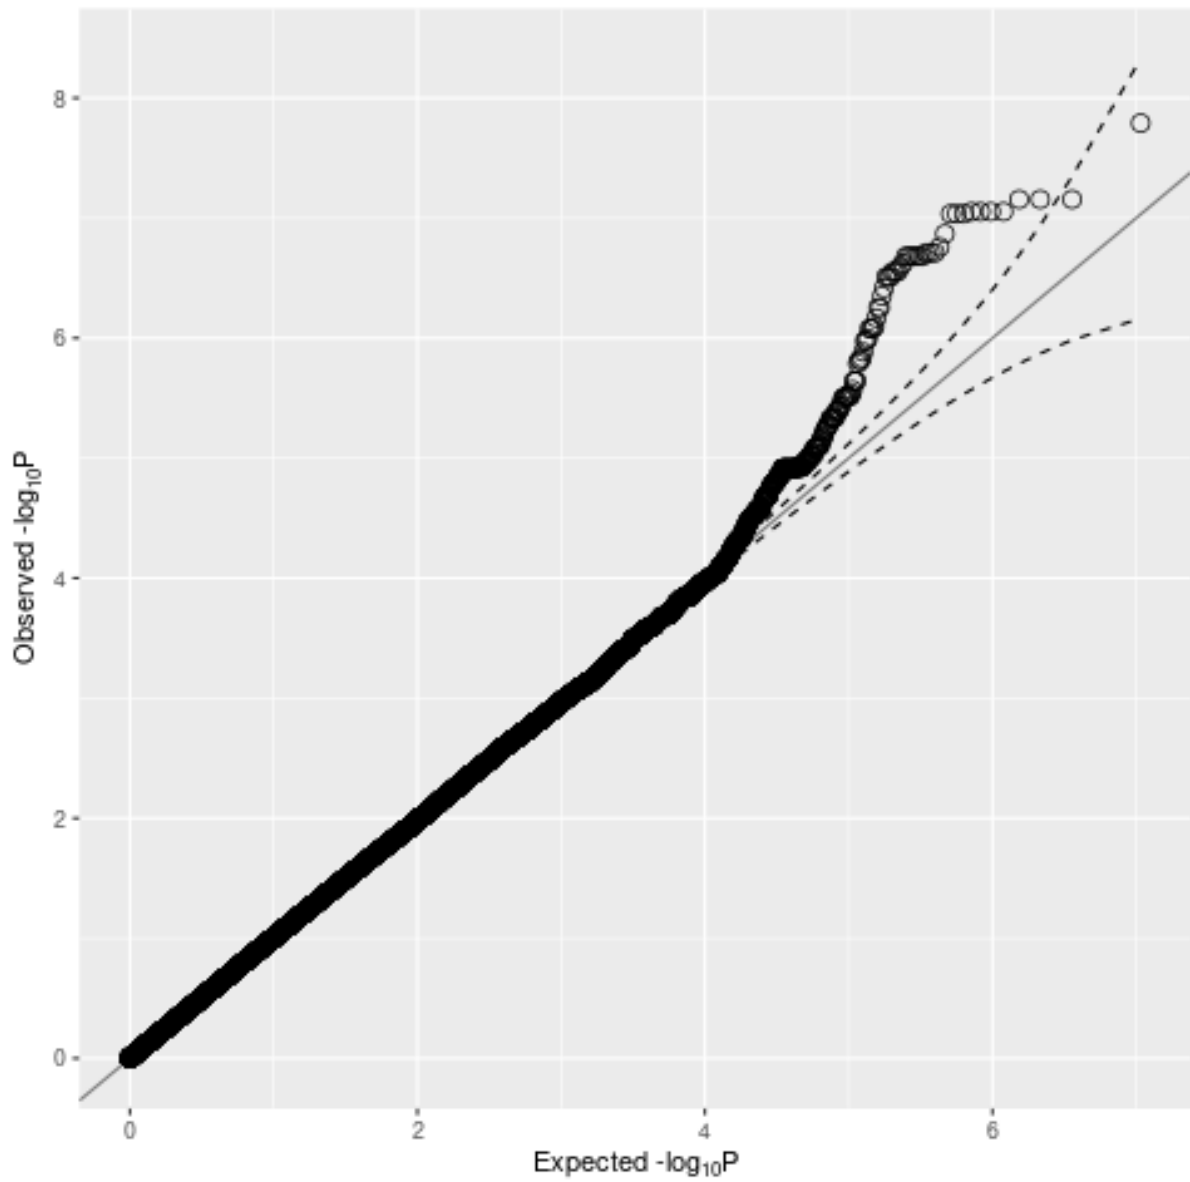

**Supplementary Figure S8.** Quantile-Quantile plot for the creatinine GWAS. Comparison of observed and expected  $-\log_{10} p$ -values expected under the null distribution of no genetic association across the genome. The dotted line represents the pointwise 95% confidence interval expected under the null hypothesis of no association.

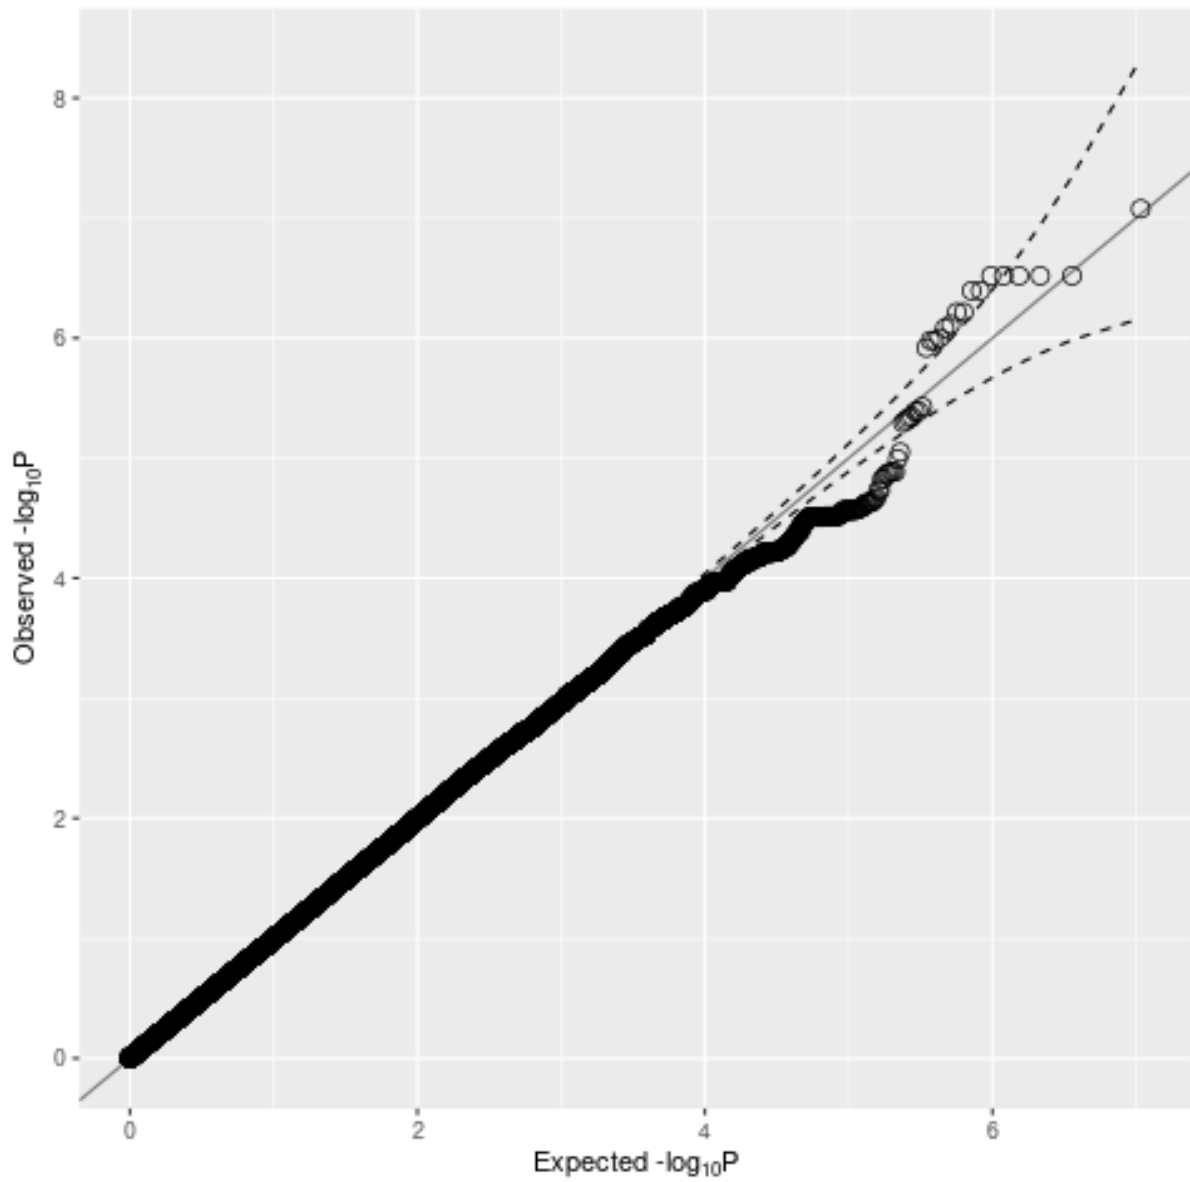

**Supplementary Figure S9.** Quantile-Quantile plot for the formate GWAS. Comparison of observed and expected  $-\log_{10} p$ -values expected under the null distribution of no genetic association across the genome. The dotted line represents the pointwise 95% confidence interval expected under the null hypothesis of no association.

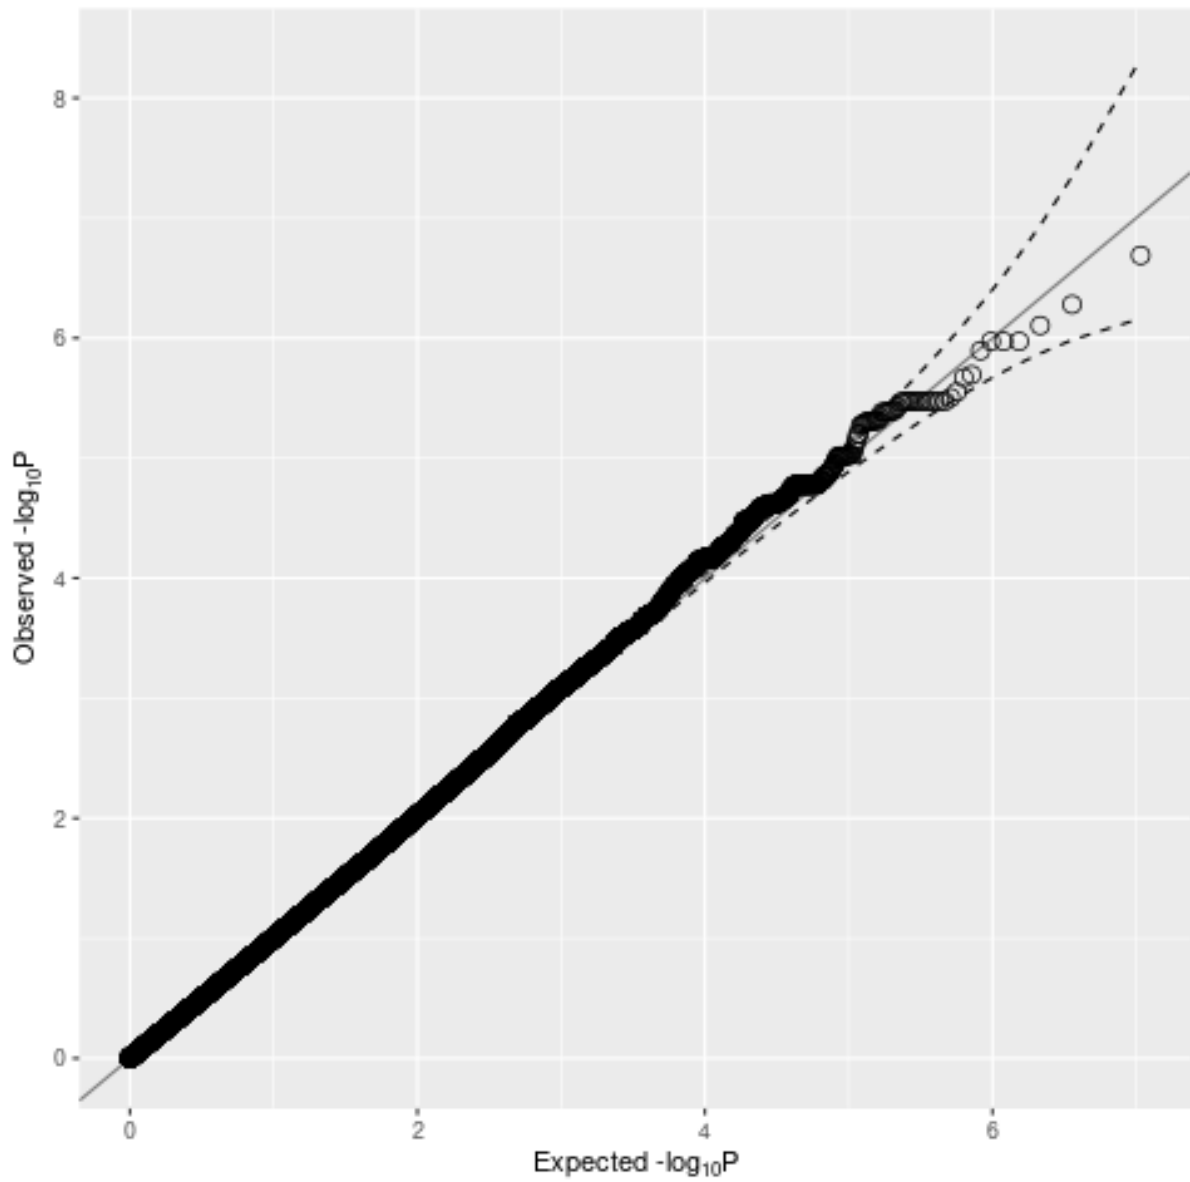

**Supplementary Figure S10.** Quantile-Quantile plot for the glucose GWAS. Comparison of observed and expected  $-\log_{10} p$ -values expected under the null distribution of no genetic association across the genome. The dotted line represents the pointwise 95% confidence interval expected under the null hypothesis of no association.

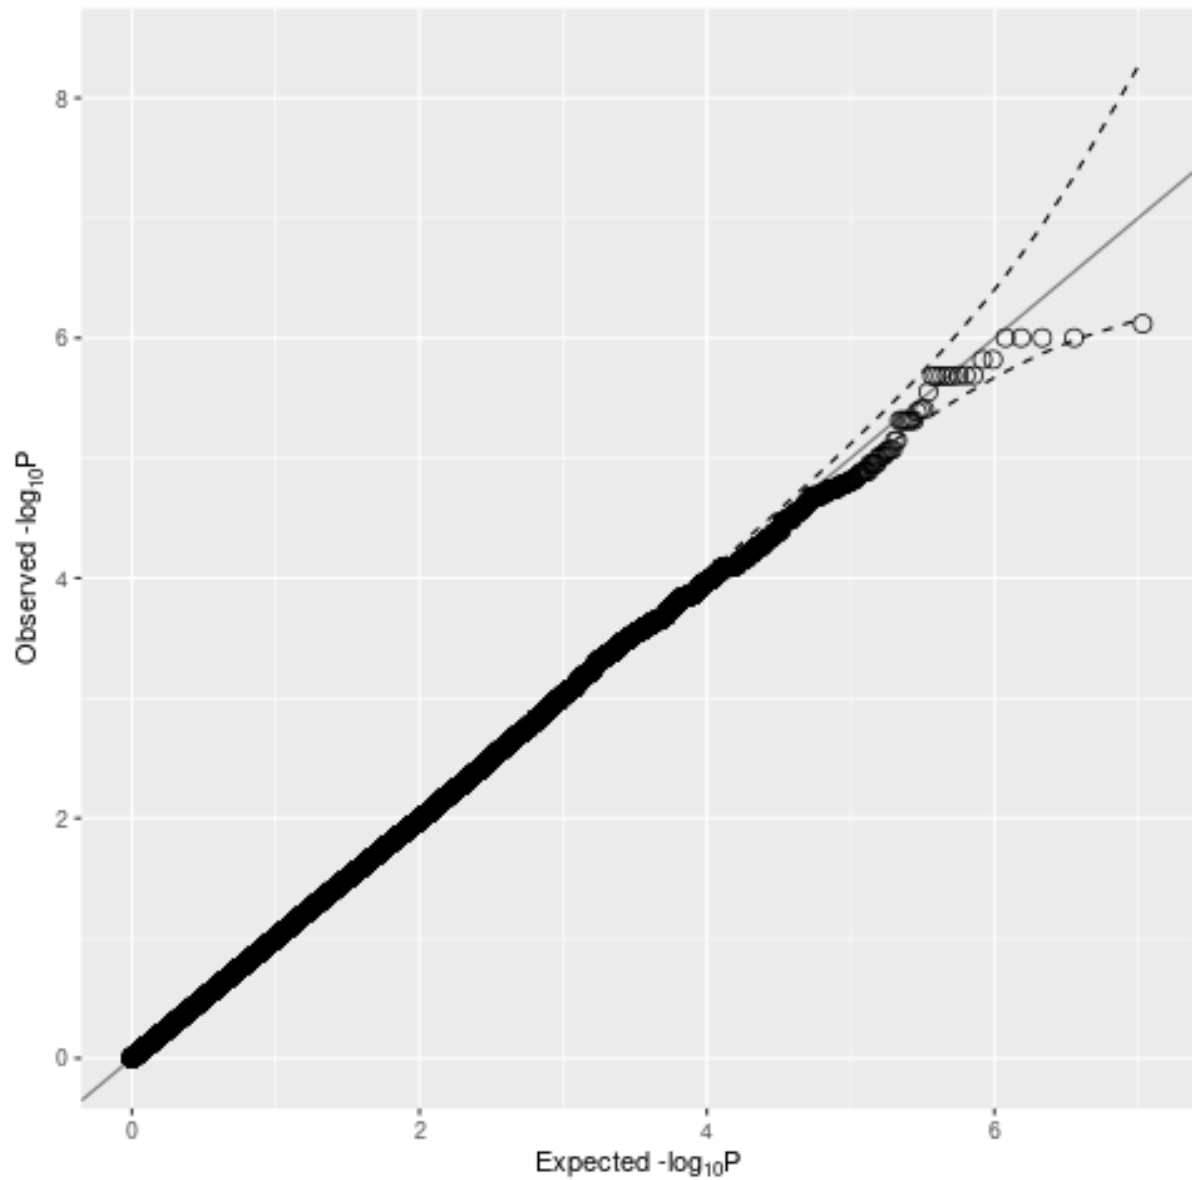

**Supplementary Figure S11.** Quantile-Quantile plot for the glycerol GWAS. Comparison of observed and expected  $-\log_{10} p$ -values expected under the null distribution of no genetic association across the genome. The dotted line represents the pointwise 95% confidence interval expected under the null hypothesis of no association.

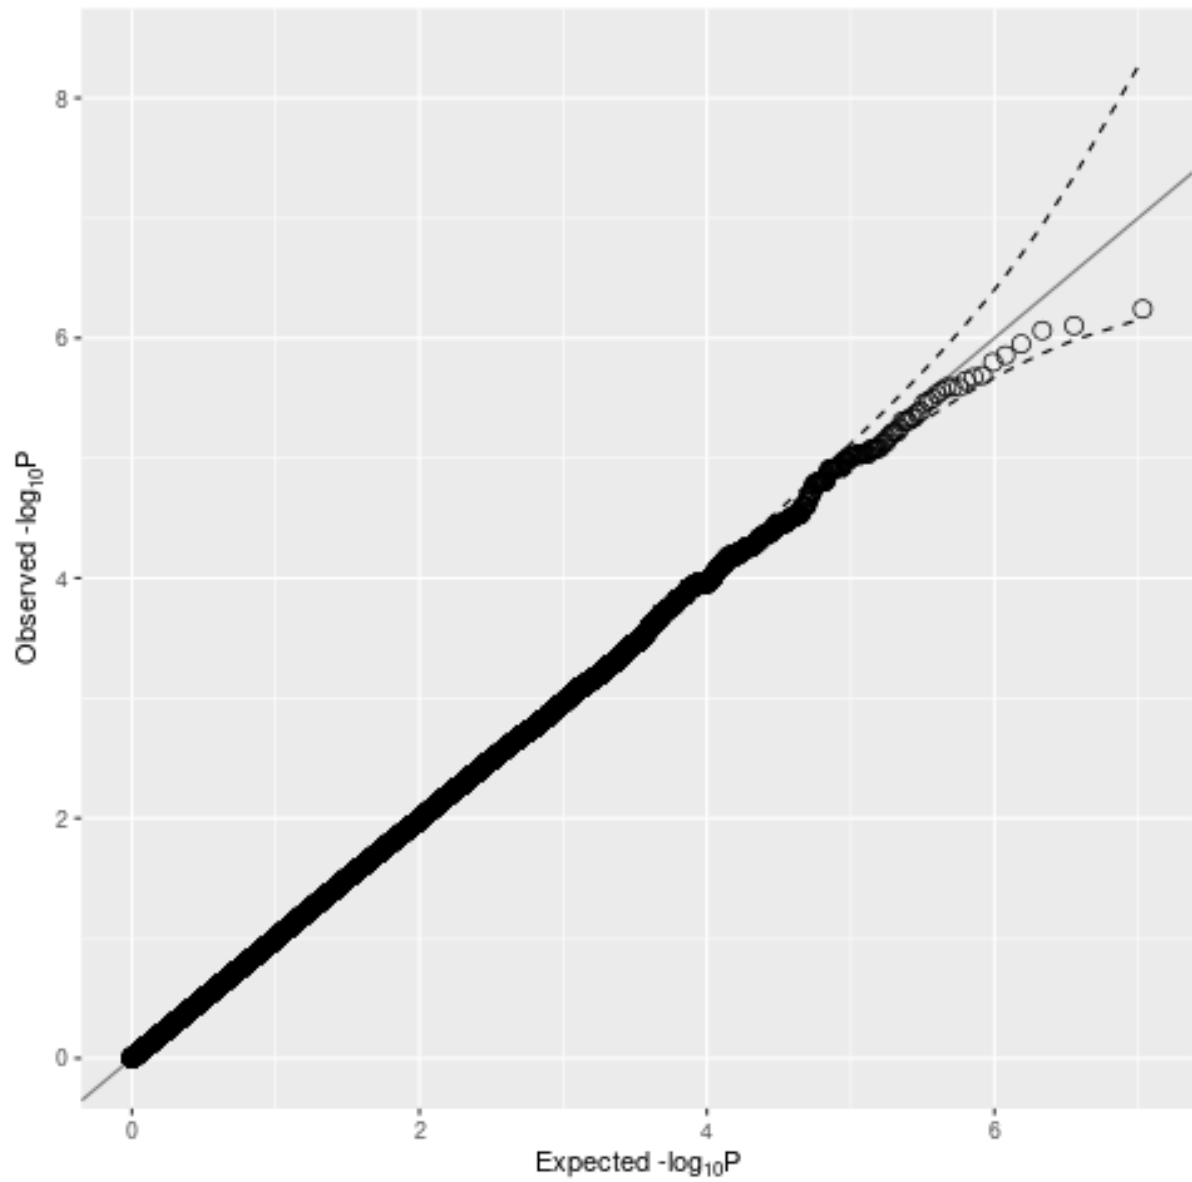

**Supplementary Figure S12.** Quantile-Quantile plot for the glycine GWAS. Comparison of observed and expected  $-\log_{10} p$ -values expected under the null distribution of no genetic association across the genome. The dotted line represents the pointwise 95% confidence interval expected under the null hypothesis of no association.

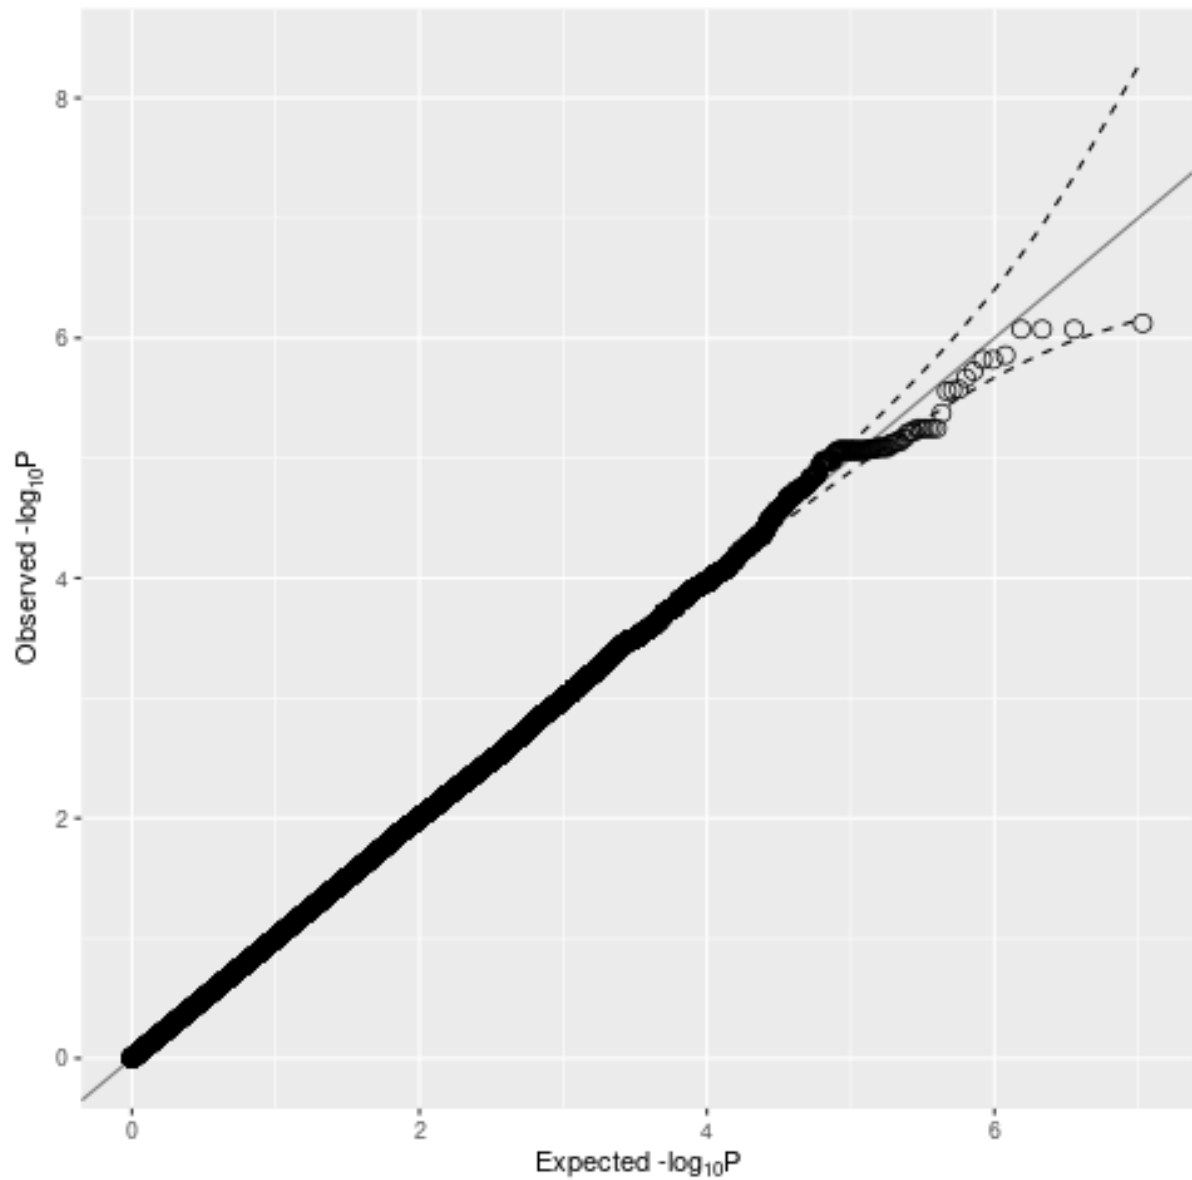

**Supplementary Figure S13.** Quantile-Quantile plot for the lactate GWAS. Comparison of observed and expected  $-\log_{10} p$ -values expected under the null distribution of no genetic association across the genome. The dotted line represents the pointwise 95% confidence interval expected under the null hypothesis of no association.



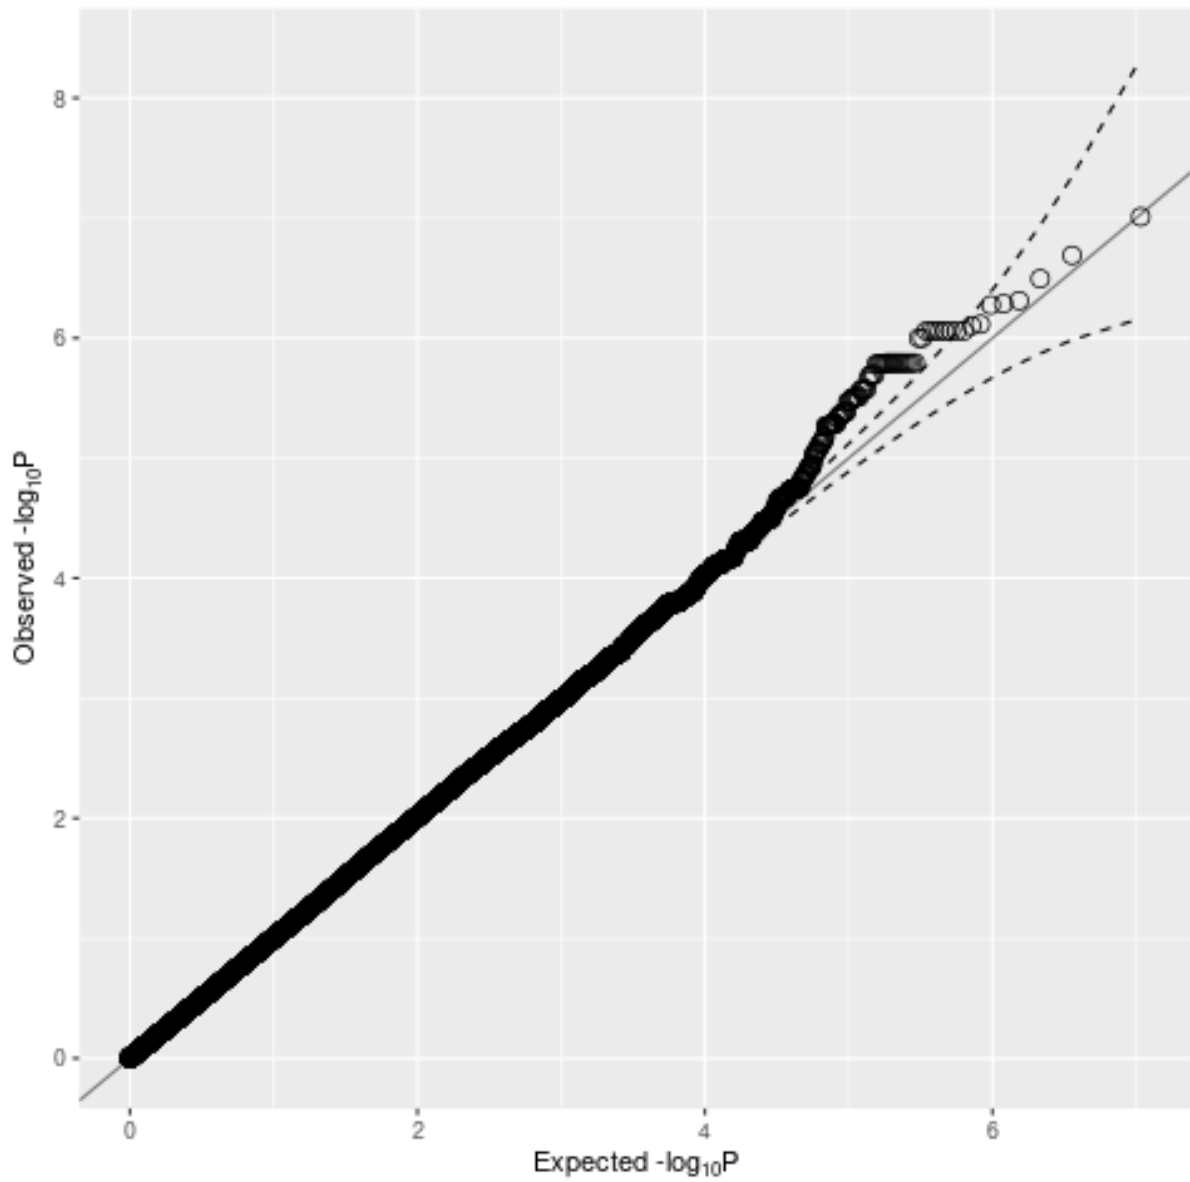

**Supplementary Figure S14.** Quantile-Quantile plot for the leucine GWAS. Comparison of observed and expected  $-\log_{10} p$ -values expected under the null distribution of no genetic association across the genome. The dotted line represents the pointwise 95% confidence interval expected under the null hypothesis of no association.

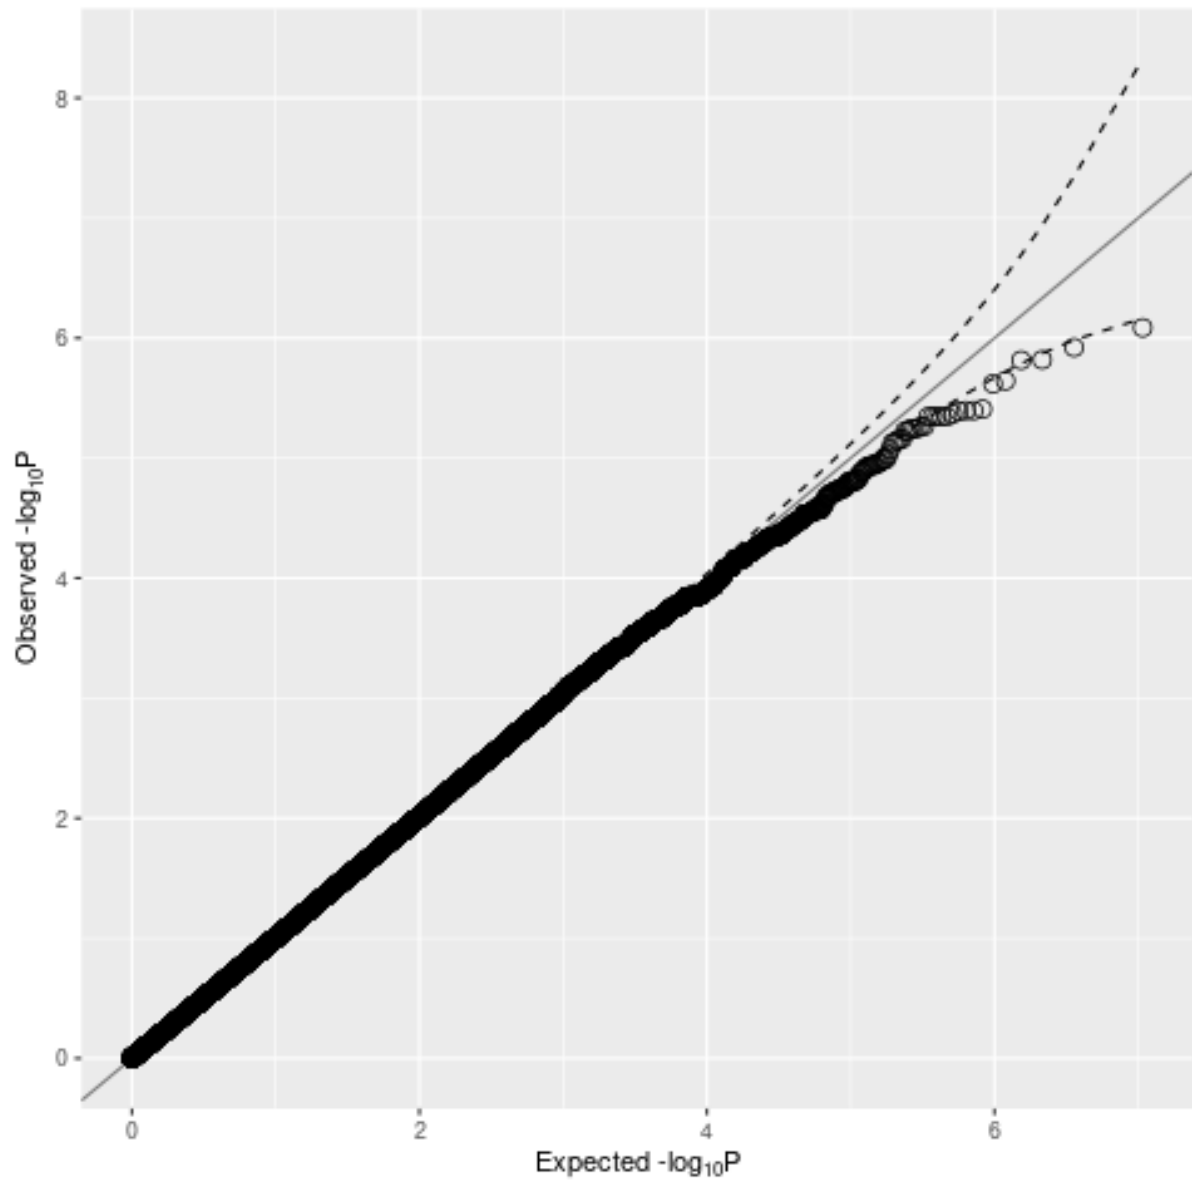

**Supplementary Figure S15.** Quantile-Quantile plot for the methanol GWAS. Comparison of observed and expected  $-\log_{10} p$ -values expected under the null distribution of no genetic association across the genome. The dotted line represents the pointwise 95% confidence interval expected under the null hypothesis of no association.

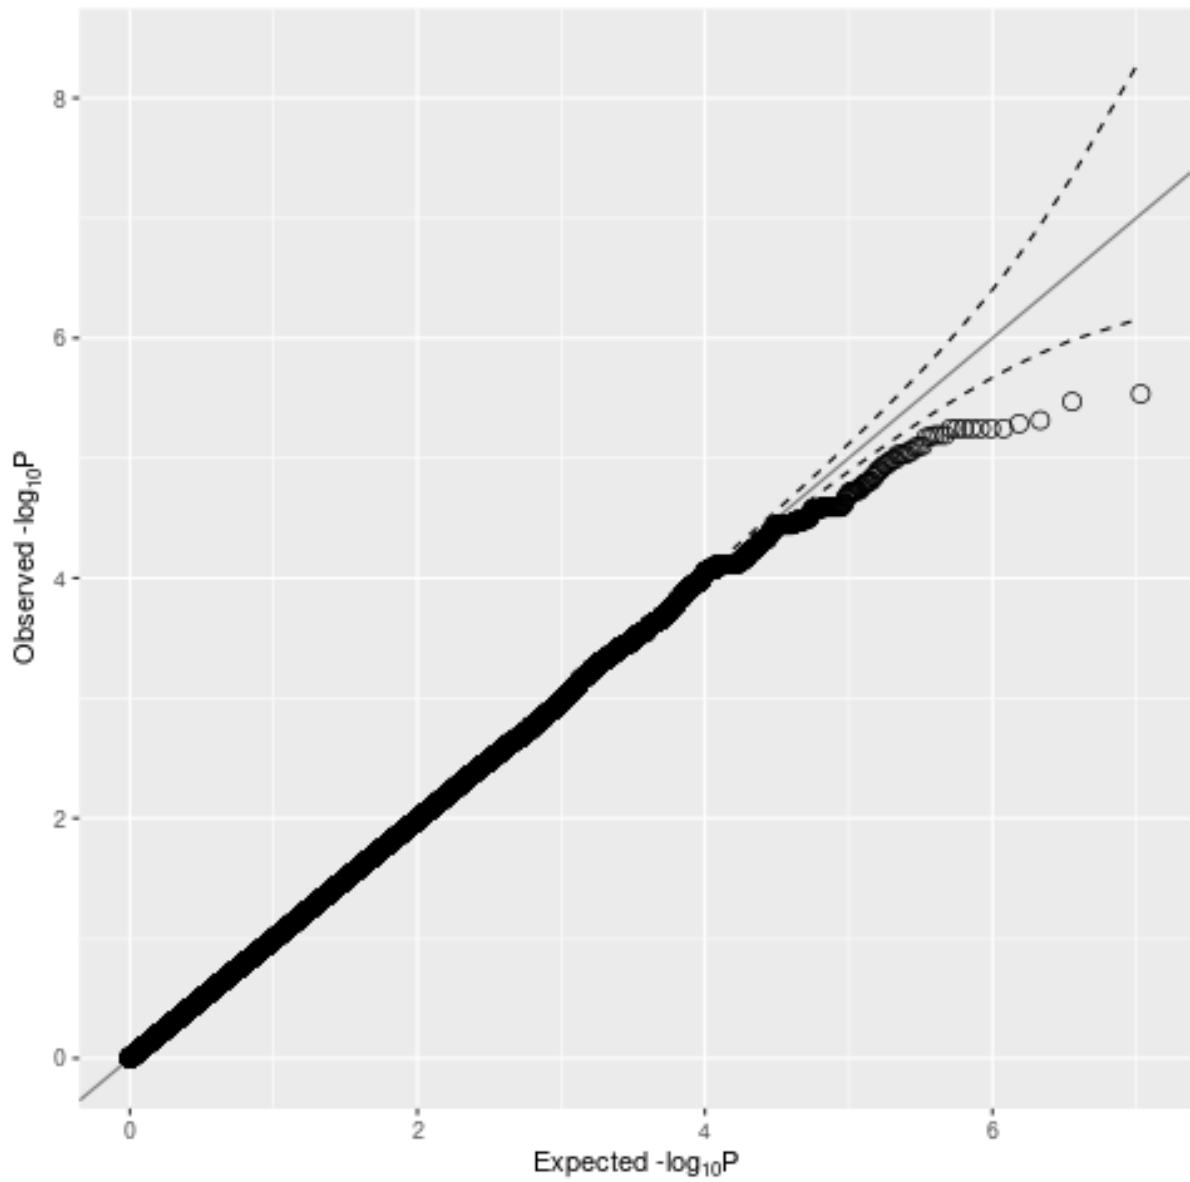

**Supplementary Figure S16.** Quantile-Quantile plot for the myo inositol GWAS. Comparison of observed and expected  $-\log_{10}p$ -values expected under the null distribution of no genetic association across the genome. The dotted line represents the pointwise 95% confidence interval expected under the null hypothesis of no association.

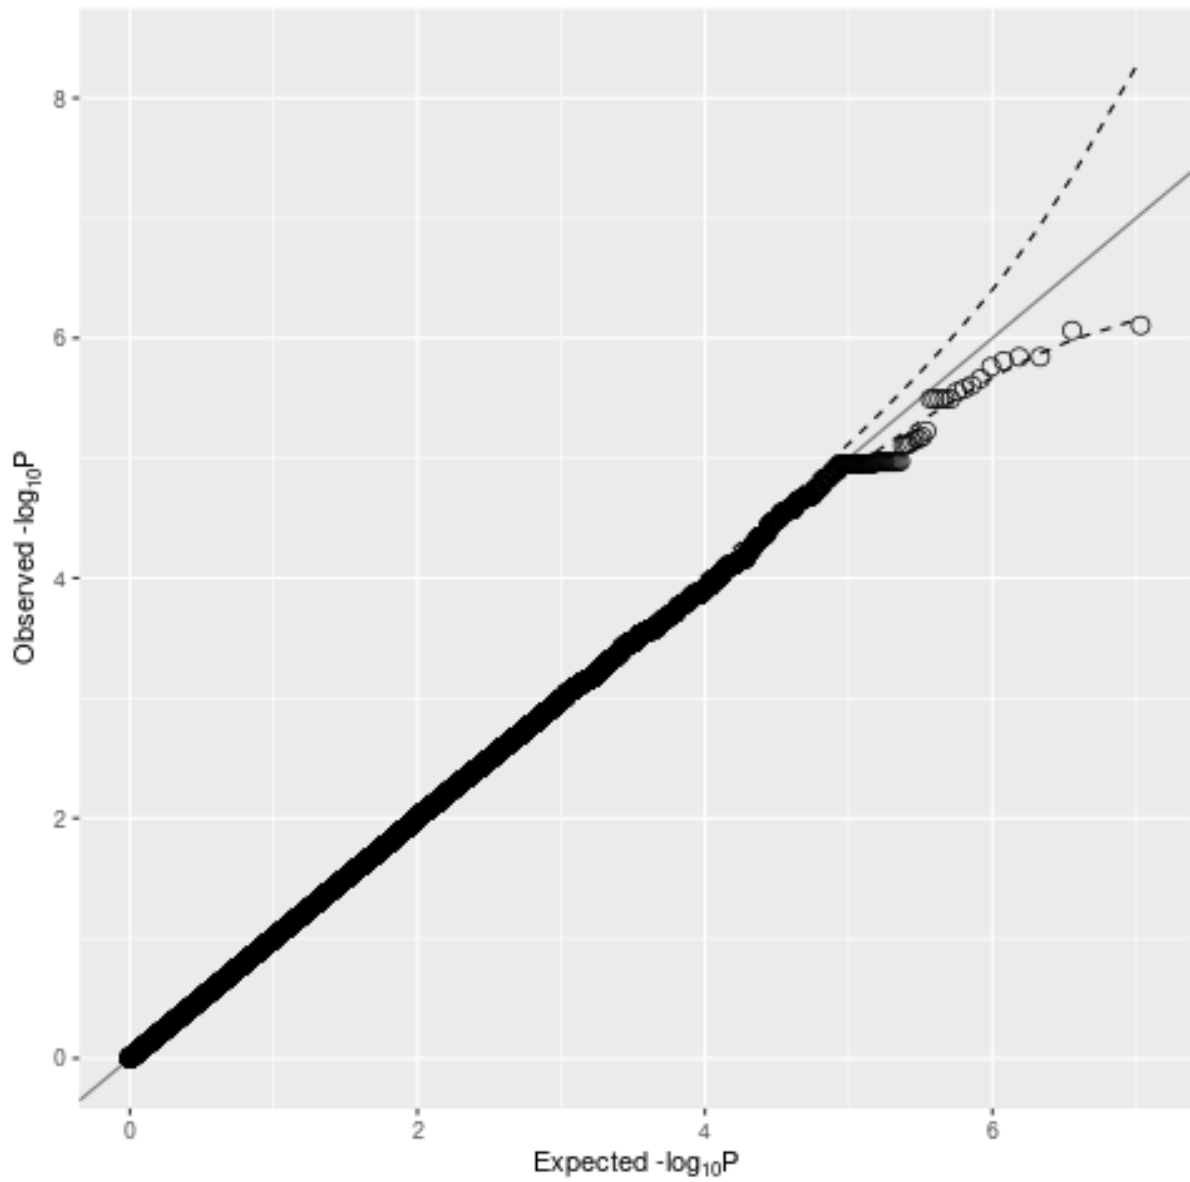

**Supplementary Figure S17.** Quantile-Quantile plot for the phenylalanine GWAS. Comparison of observed and expected  $-\log_{10} p$ -values expected under the null distribution of no genetic association across the genome. The dotted line represents the pointwise 95% confidence interval expected under the null hypothesis of no association.

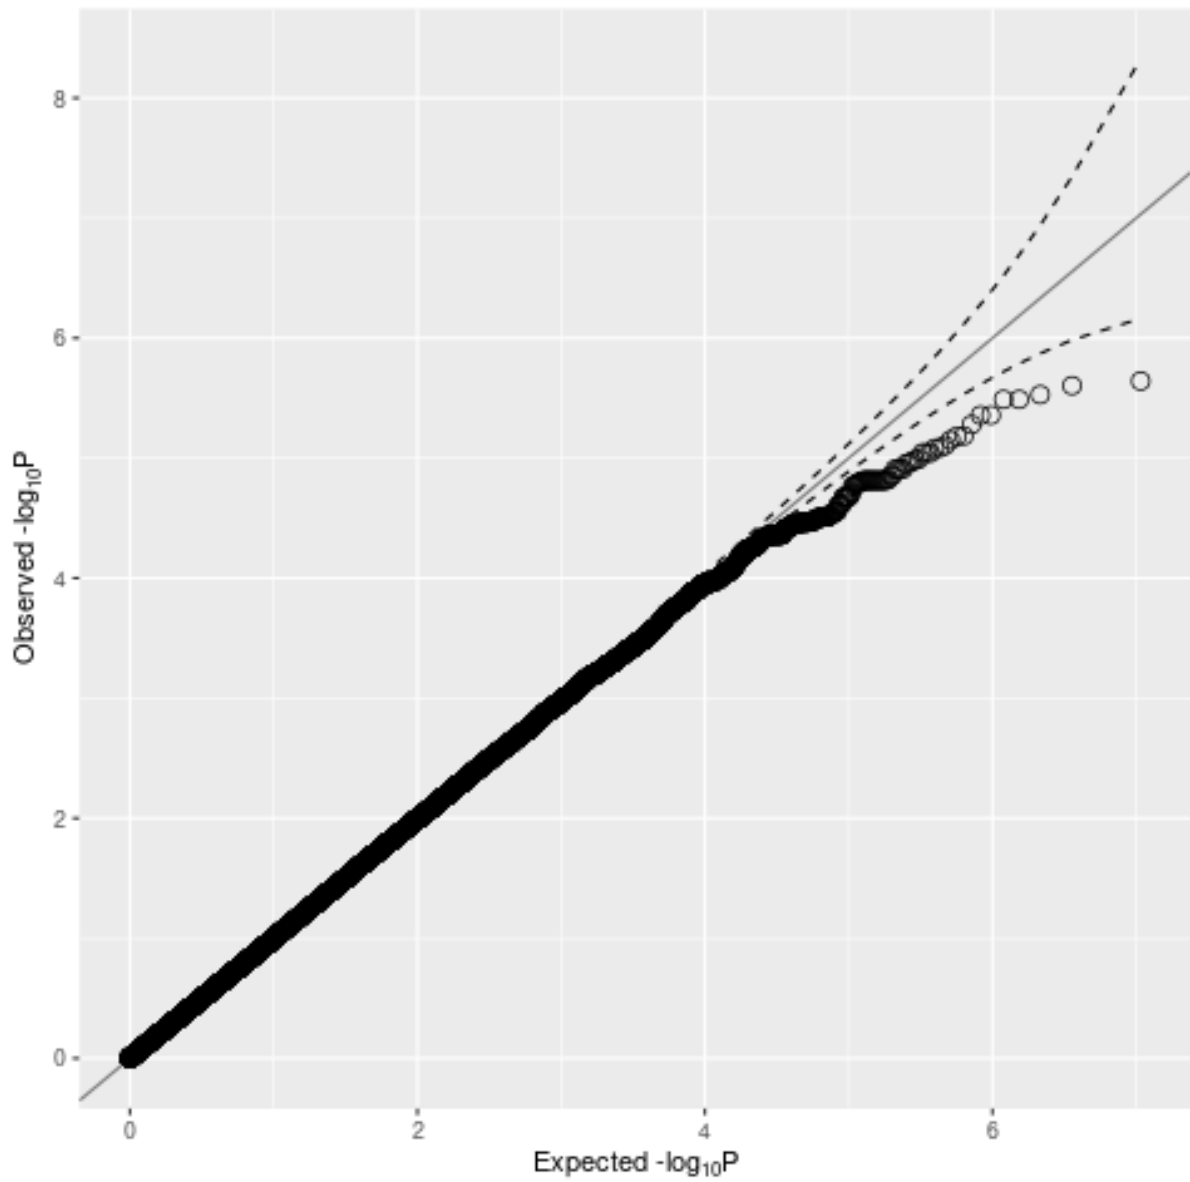

**Supplementary Figure S18.** Quantile-Quantile plot for the pyruvate GWAS. Comparison of observed and expected  $-\log_{10} p$ -values expected under the null distribution of no genetic association across the genome. The dotted line represents the pointwise 95% confidence interval expected under the null hypothesis of no association.

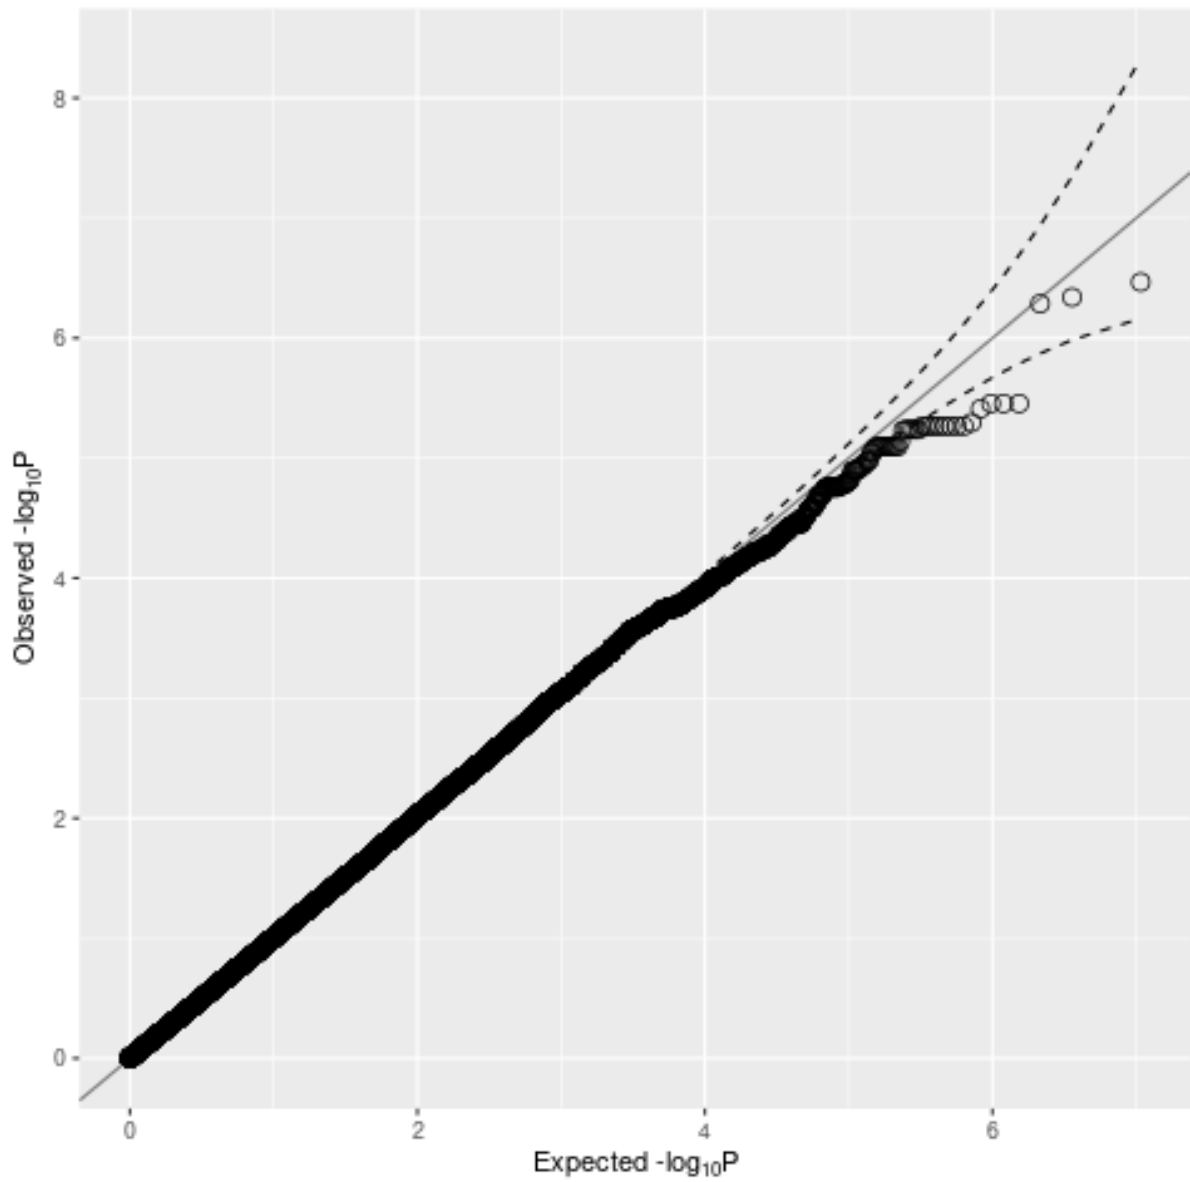

**Supplementary Figure S19.** Quantile-Quantile plot for the tyrosine GWAS. Comparison of observed and expected  $-\log_{10} p$ -values expected under the null distribution of no genetic association across the genome. The dotted line represents the pointwise 95% confidence interval expected under the null hypothesis of no association.

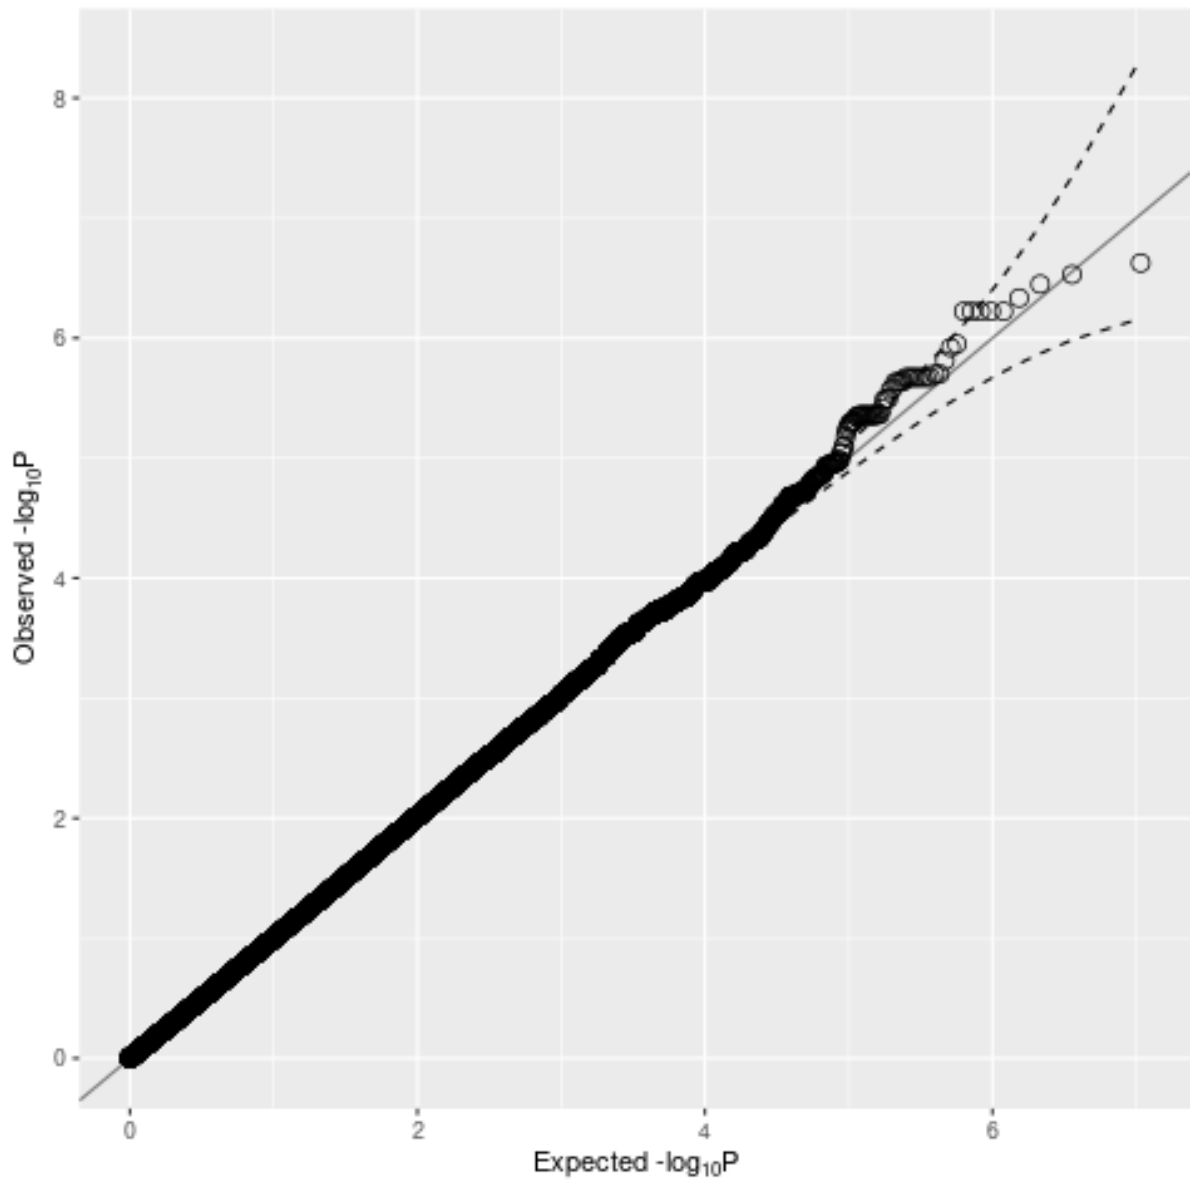

**Supplementary Figure S20.** Quantile-Quantile plot for the valine GWAS. Comparison of observed and expected  $-\log_{10} p$ -values expected under the null distribution of no genetic association across the genome. The dotted line represents the pointwise 95% confidence interval expected under the null hypothesis of no association.

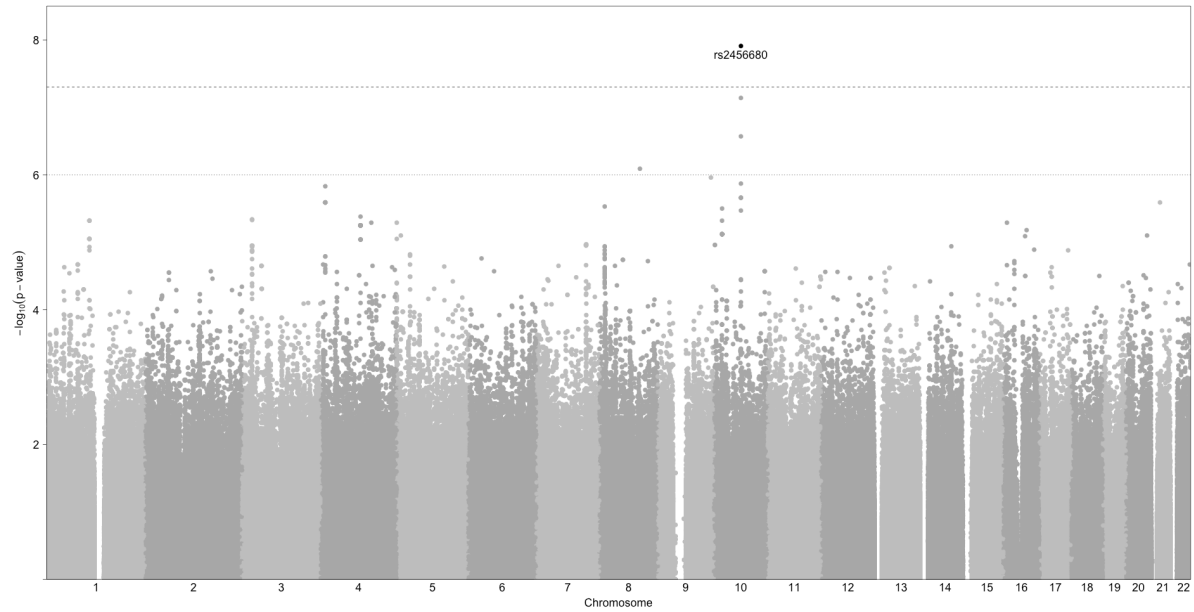

**Supplementary Figure S21.** Manhattan plot for the 3-hydroxybutyrate GWAS. The dashed line denotes 'genome-wide significance' threshold of  $p < 5 \times 10^{-8}$  whilst the dotted line denotes 'suggestive significance' threshold of  $p < 1 \times 10^{-6}$ . SNPs with a minor allele frequency (MAF)  $< 1\%$  were removed.

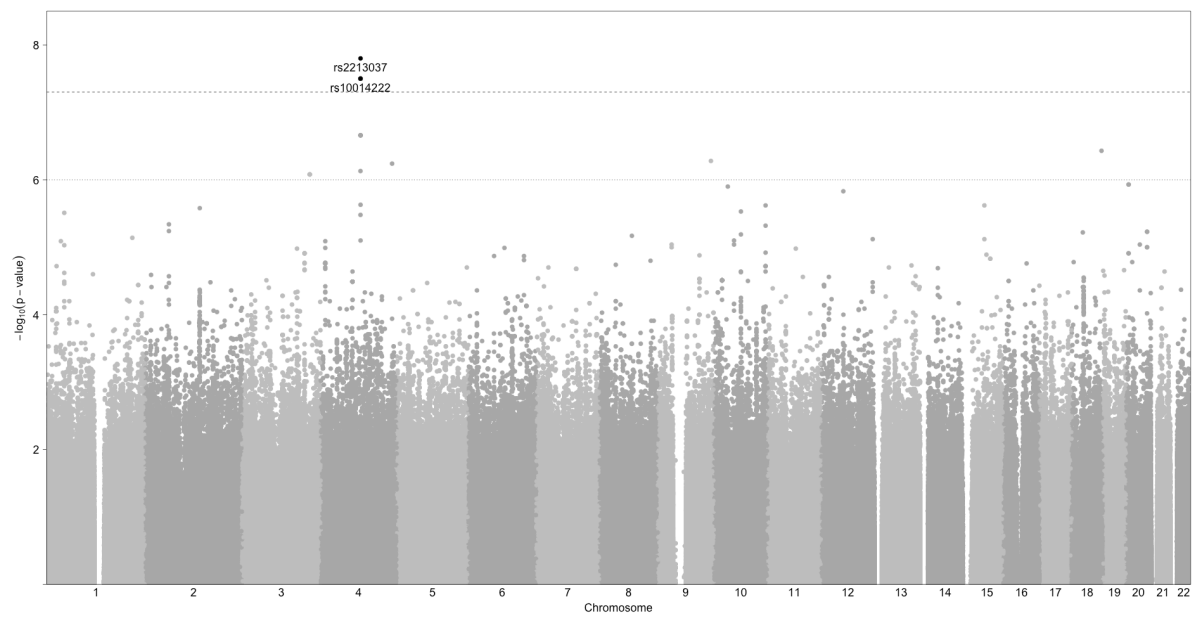

**Supplementary Figure S22.** Manhattan plot for the acetoacetate GWAS. The dashed line denotes 'genome-wide significance' threshold of  $p < 5 \times 10^{-8}$  whilst the dotted line denotes 'suggestive significance' threshold of  $p < 1 \times 10^{-6}$ . SNPs with a minor allele frequency (MAF)  $< 1\%$  were removed.



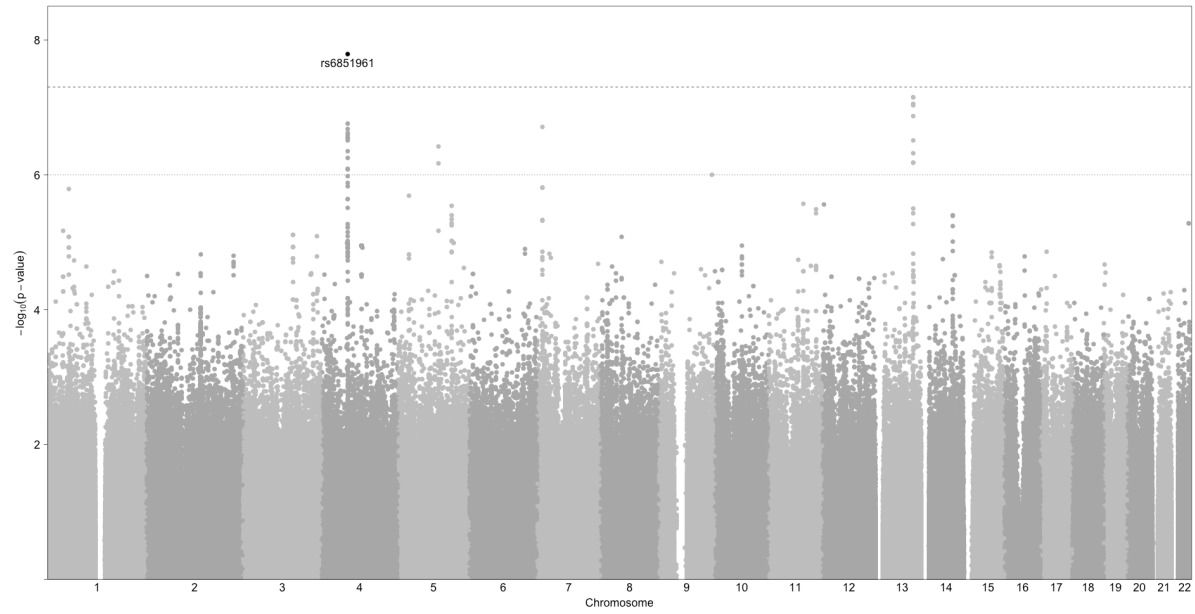

**Supplementary Figure S23.** Manhattan plot for the creatinine GWAS. The dashed line denotes 'genome-wide significance' threshold of  $p < 5 \times 10^{-8}$  whilst the dotted line denotes 'suggestive significance' threshold of  $p < 1 \times 10^{-6}$ . SNPs with a minor allele frequency (MAF)  $< 1\%$  were removed.

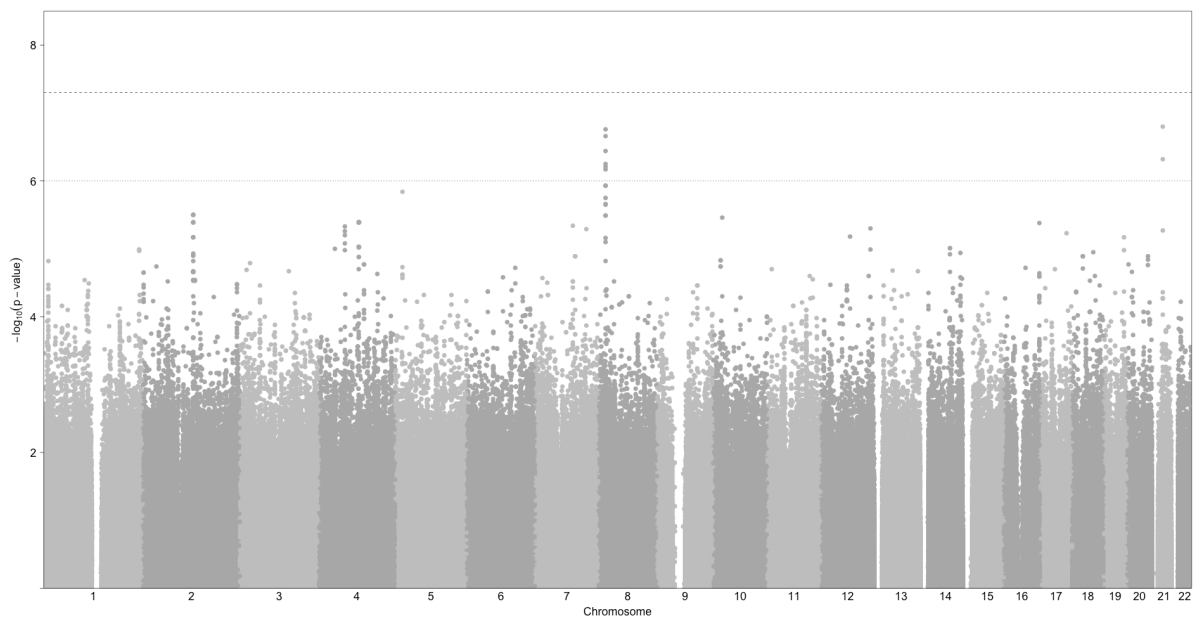

**Supplementary Figure S24.** Manhattan plot for the acetate GWAS. The dashed line denotes 'genome-wide significance' threshold of  $p < 5 \times 10^{-8}$  whilst the dotted line denotes 'suggestive significance' threshold of  $p < 1 \times 10^{-6}$ . SNPs with a minor allele frequency (MAF)  $< 1\%$  were removed.

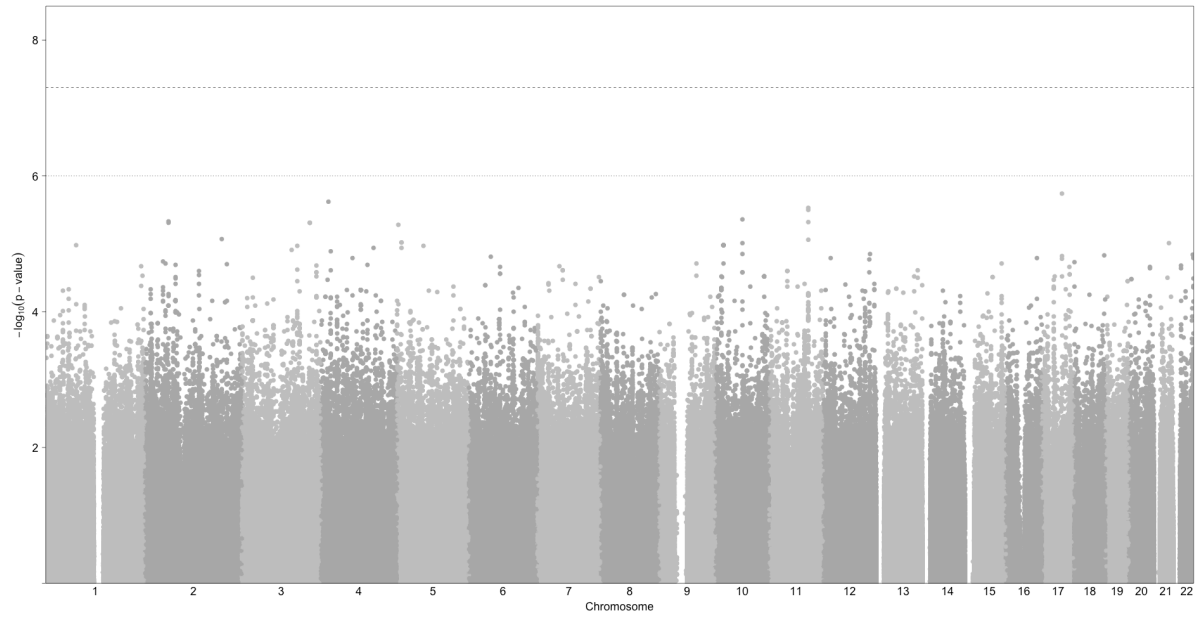

**Supplementary Figure S25.** Manhattan plot for the acetone GWAS. The dashed line denotes 'genome-wide significance' threshold of  $p < 5 \times 10^{-8}$  whilst the dotted line denotes 'suggestive significance' threshold of  $p < 1 \times 10^{-6}$ . SNPs with a minor allele frequency (MAF)  $< 1\%$  were removed.

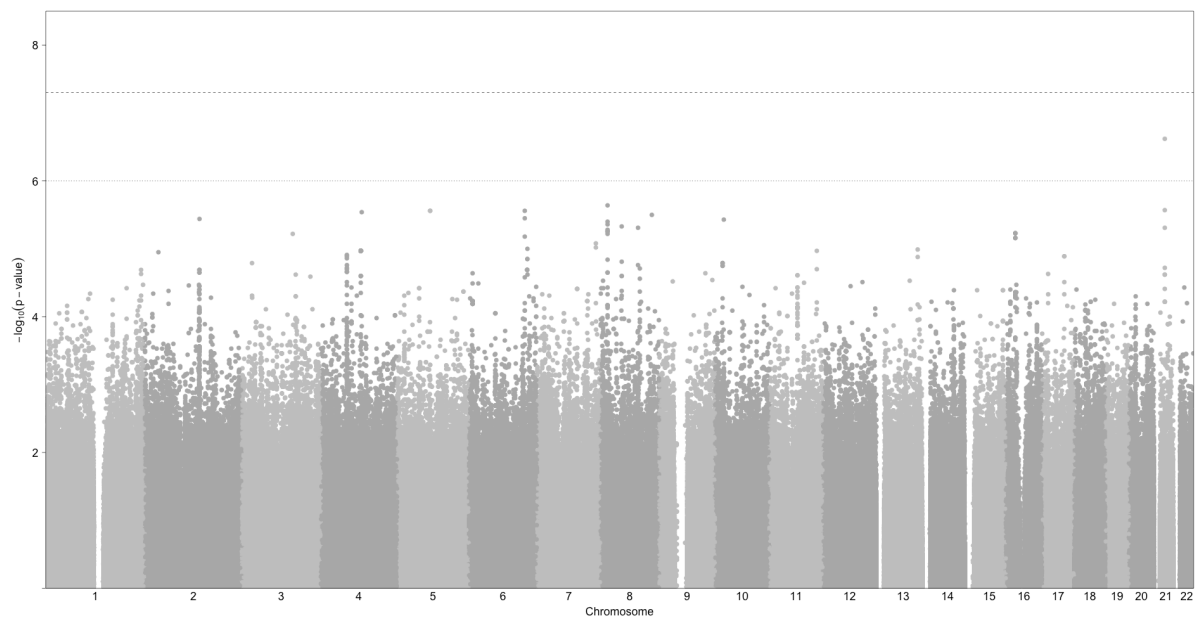

**Supplementary Figure S26.** Manhattan plot for the alanine GWAS. The dashed line denotes 'genome-wide significance' threshold of  $p < 5 \times 10^{-8}$  whilst the dotted line denotes 'suggestive significance' threshold of  $p < 1 \times 10^{-6}$ . SNPs with a minor allele frequency (MAF)  $< 1\%$  were removed.

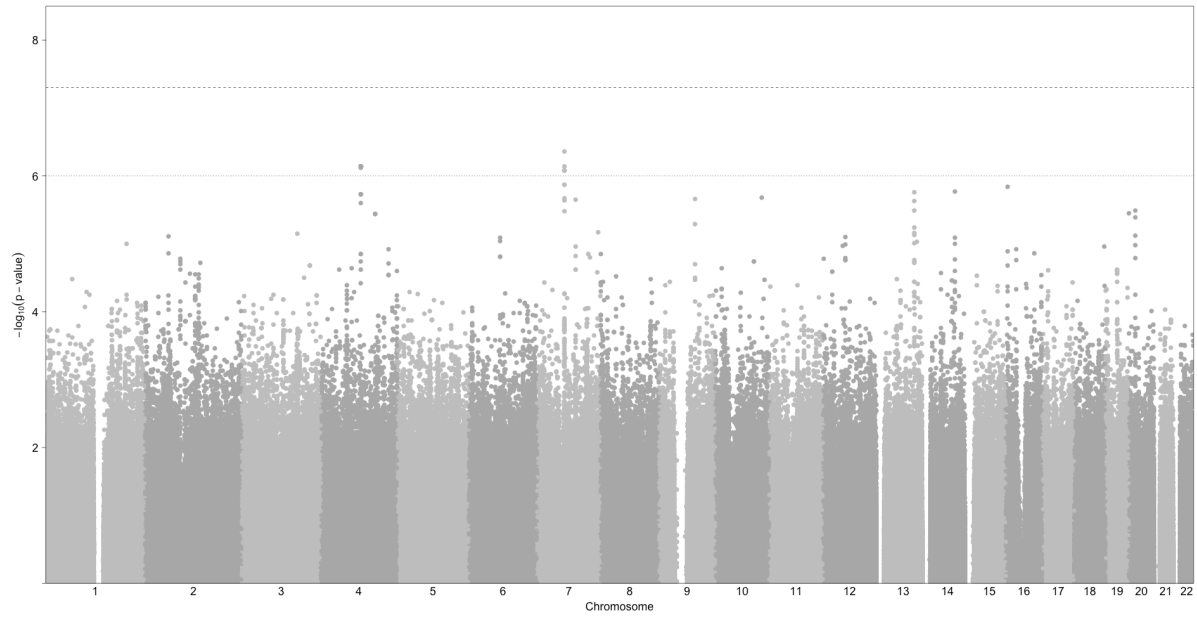

**Supplementary Figure S27.** Manhattan plot for the citrate GWAS. The dashed line denotes ‘genome-wide significance’ threshold of  $p < 5 \times 10^{-8}$  whilst the dotted line denotes ‘suggestive significance’ threshold of  $p < 1 \times 10^{-6}$ . SNPs with a minor allele frequency (MAF)  $< 1\%$  were removed.

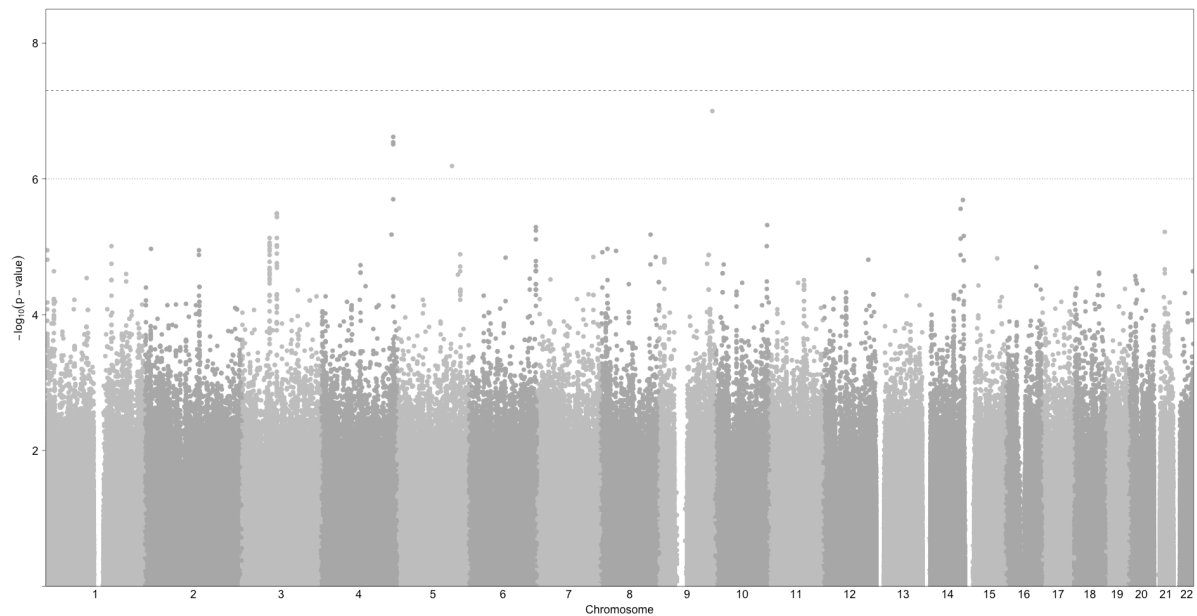

**Supplementary Figure S28.** Manhattan plot for the creatine GWAS. The dashed line denotes ‘genome-wide significance’ threshold of  $p < 5 \times 10^{-8}$  whilst the dotted line denotes ‘suggestive significance’ threshold of  $p < 1 \times 10^{-6}$ . SNPs with a minor allele frequency (MAF)  $< 1\%$  were removed.

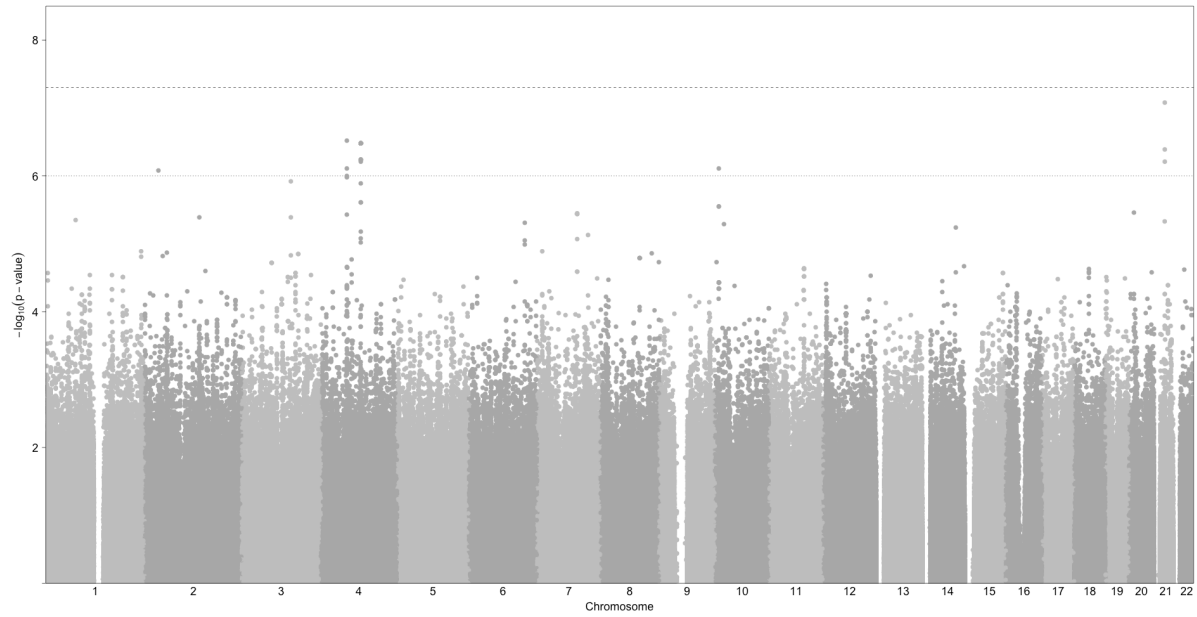

**Supplementary Figure S29.** Manhattan plot for the formate GWAS. The dashed line denotes 'genome-wide significance' threshold of  $p < 5 \times 10^{-8}$  whilst the dotted line denotes 'suggestive significance' threshold of  $p < 1 \times 10^{-6}$ . SNPs with a minor allele frequency (MAF)  $< 1\%$  were removed.

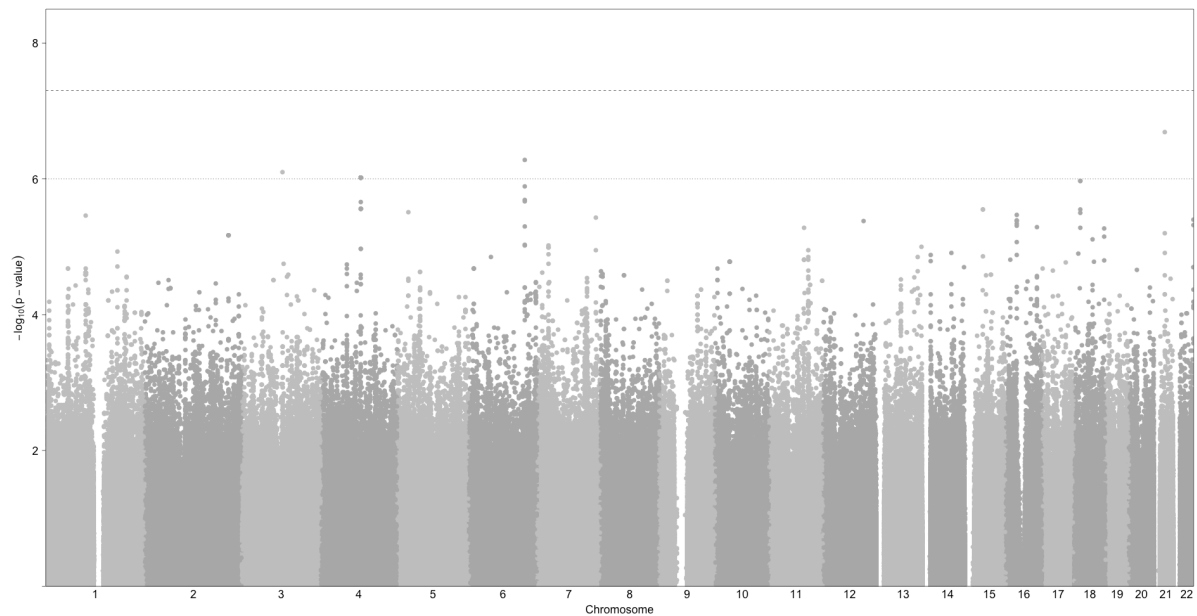

**Supplementary Figure S30.** Manhattan plot for the glucose GWAS. The dashed line denotes 'genome-wide significance' threshold of  $p < 5 \times 10^{-8}$  whilst the dotted line denotes 'suggestive significance' threshold of  $p < 1 \times 10^{-6}$ . SNPs with a minor allele frequency (MAF)  $< 1\%$  were removed.

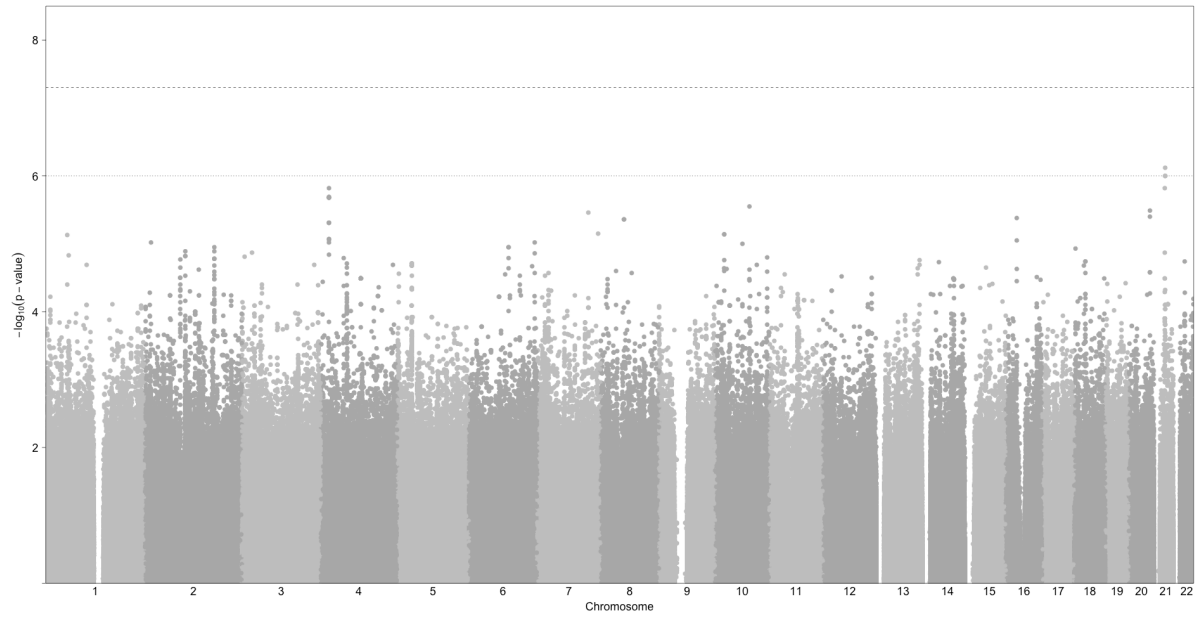

**Supplementary Figure S31.** Manhattan plot for the glycerol genome-wide association study. The dashed line denotes 'genome-wide significance' threshold of  $p < 5 \times 10^{-8}$  whilst the dotted line denotes 'suggestive significance' threshold of  $p < 1 \times 10^{-6}$ . SNPs with a minor allele frequency (MAF)  $< 1\%$  were removed.

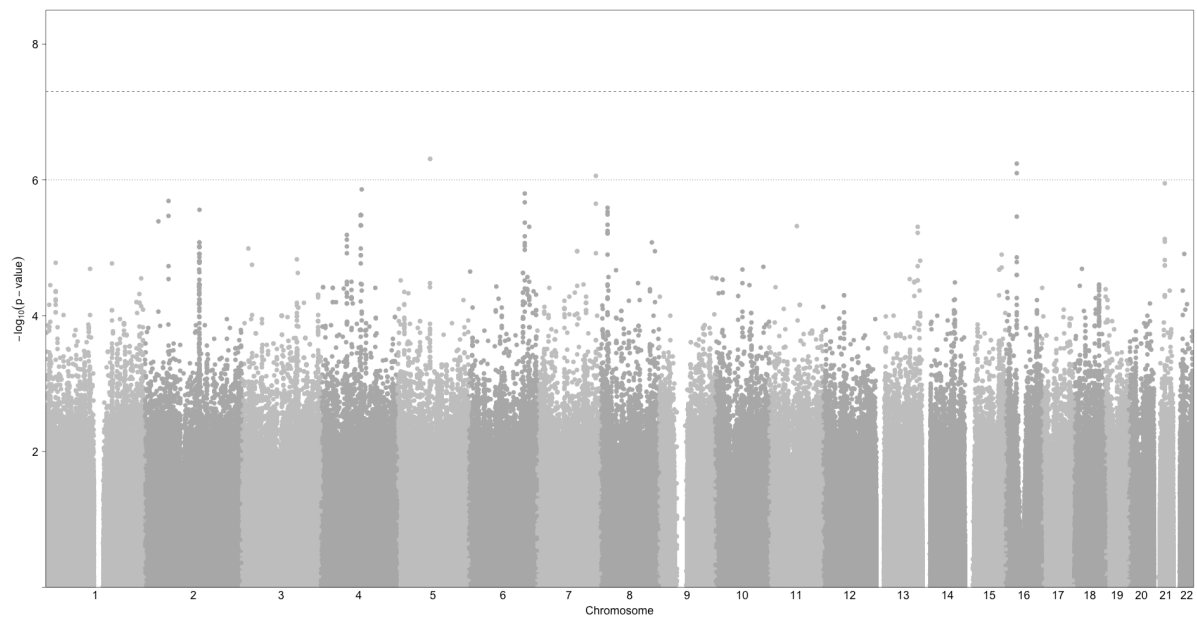

**Supplementary Figure S32.** Manhattan plot for the glycine GWAS. The dashed line denotes 'genome-wide significance' threshold of  $p < 5 \times 10^{-8}$  whilst the dotted line denotes 'suggestive significance' threshold of  $p < 1 \times 10^{-6}$ . SNPs with a minor allele frequency (MAF)  $< 1\%$  were removed.

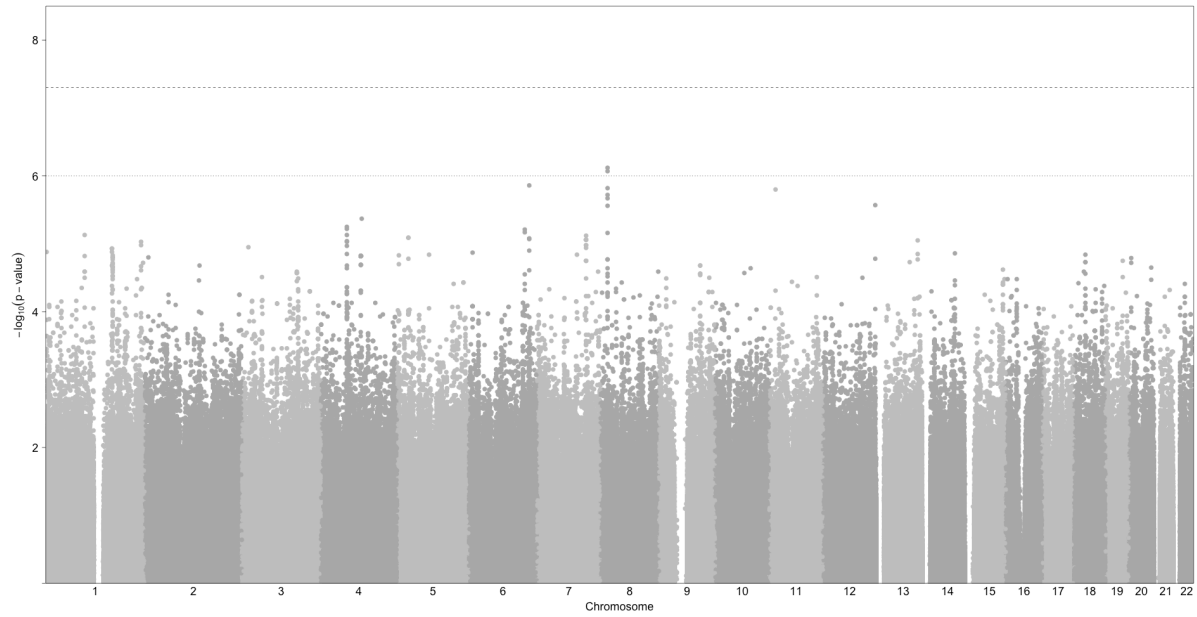

**Supplementary Figure S33.** Manhattan plot for the lactate GWAS. The dashed line denotes 'genome-wide significance' threshold of  $p < 5 \times 10^{-8}$  whilst the dotted line denotes 'suggestive significance' threshold of  $p < 1 \times 10^{-6}$ . SNPs with a minor allele frequency (MAF)  $< 1\%$  were removed.

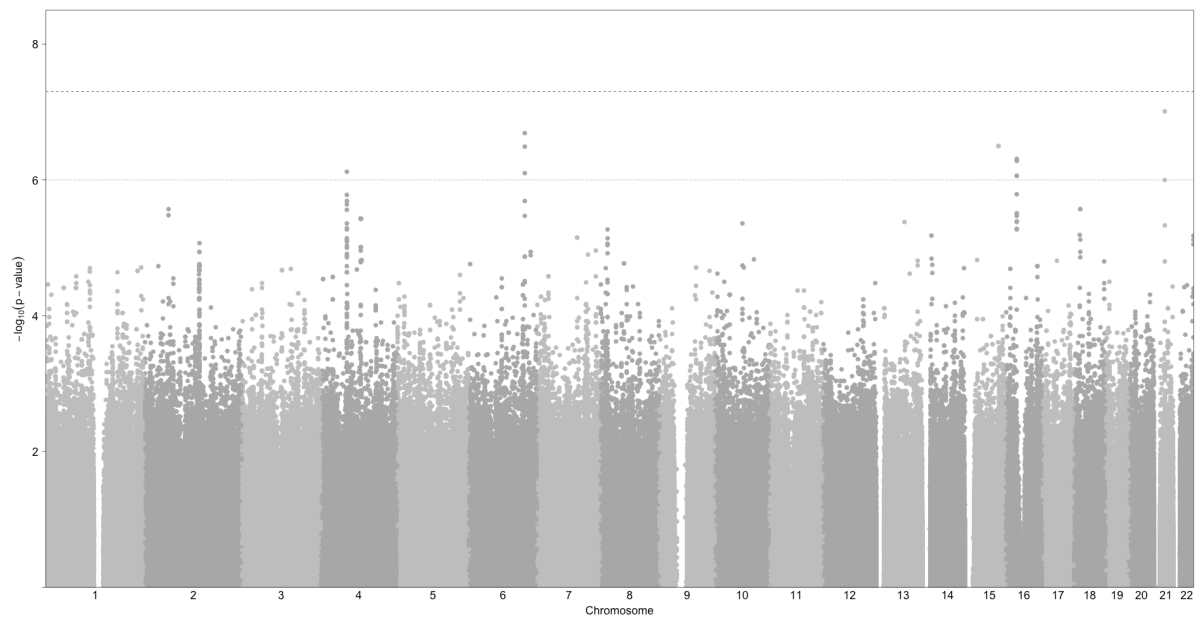

**Supplementary Figure S34.** Manhattan plot for the leucine GWAS. The dashed line denotes 'genome-wide significance' threshold of  $p < 5 \times 10^{-8}$  whilst the dotted line denotes 'suggestive significance' threshold of  $p < 1 \times 10^{-6}$ . SNPs with a minor allele frequency (MAF)  $< 1\%$  were removed.

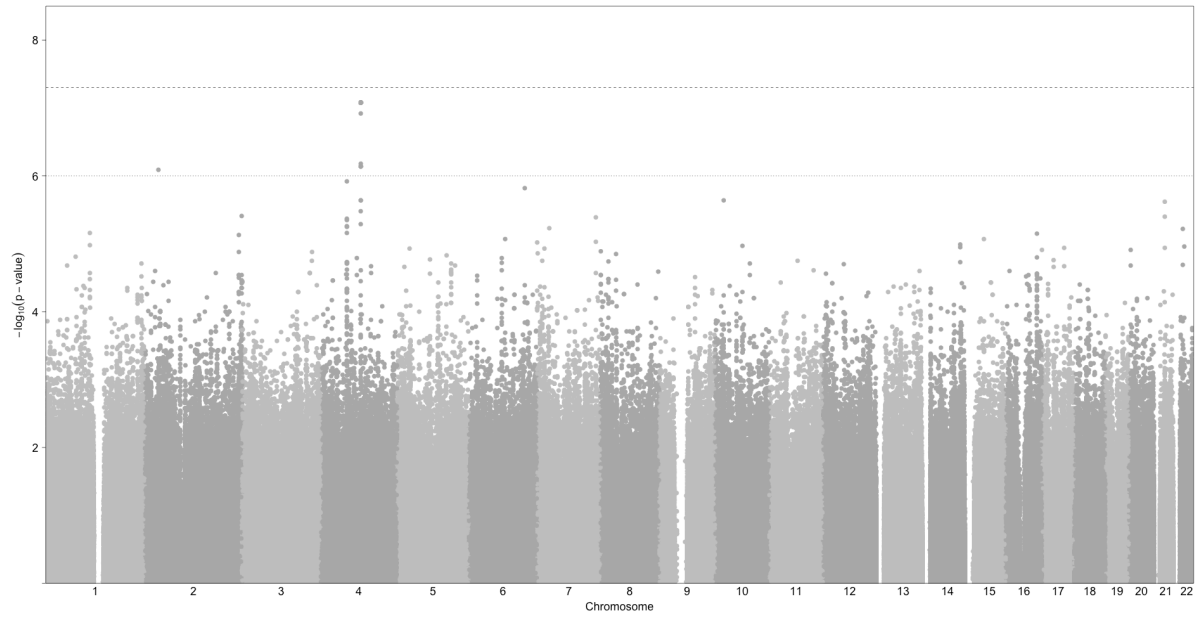

**Supplementary Figure S35.** Manhattan plot for the methanol GWAS. The dashed line denotes ‘genome-wide significance’ threshold of  $p < 5 \times 10^{-8}$  whilst the dotted line denotes ‘suggestive significance’ threshold of  $p < 1 \times 10^{-6}$ . SNPs with a minor allele frequency (MAF)  $< 1\%$  were removed.

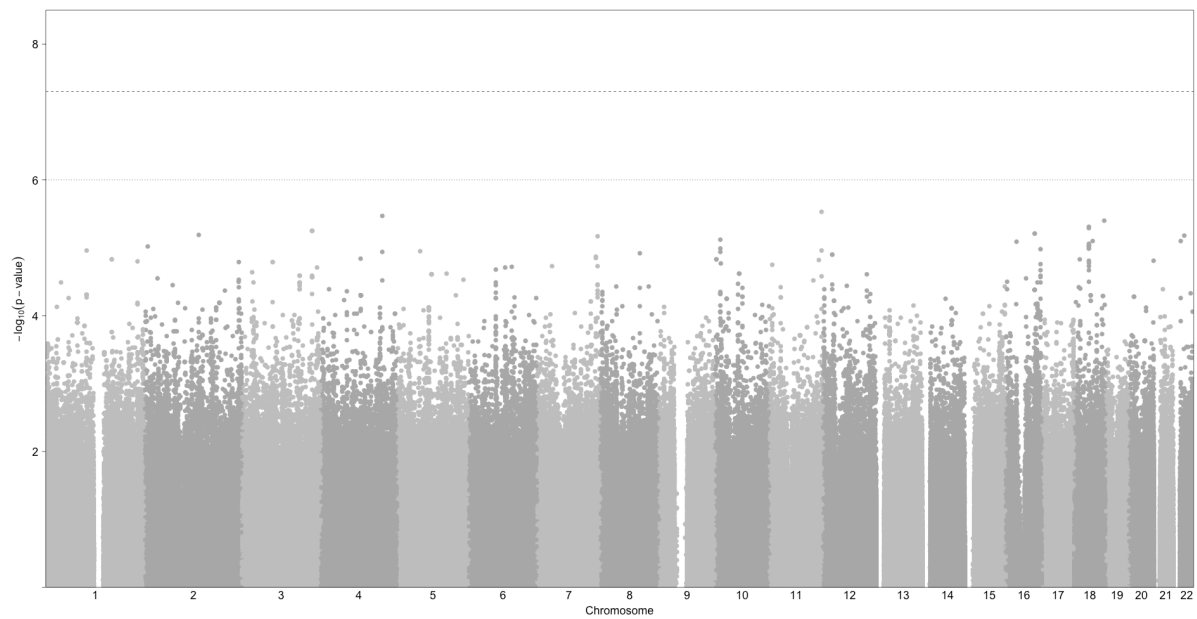

**Supplementary Figure S36.** Manhattan plot for the myo-inositol GWAS. The dashed line denotes ‘genome-wide significance’ threshold of  $p < 5 \times 10^{-8}$  whilst the dotted line denotes ‘suggestive significance’ threshold of  $p < 1 \times 10^{-6}$ . SNPs with a minor allele frequency (MAF)  $< 1\%$  were removed.

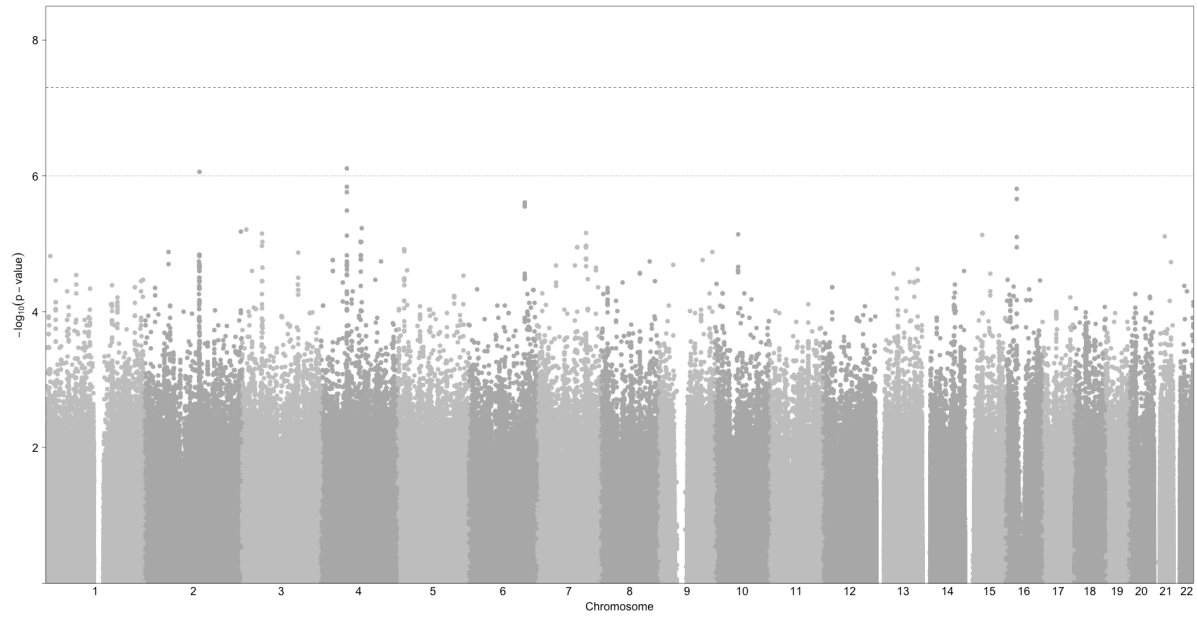

**Supplementary Figure S37.** Manhattan plot for the phenylalanine GWAS. The dashed line denotes 'genome-wide significance' threshold of  $p < 5 \times 10^{-8}$  whilst the dotted line denotes 'suggestive significance' threshold of  $p < 1 \times 10^{-6}$ . SNPs with a minor allele frequency (MAF)  $< 1\%$  were removed.

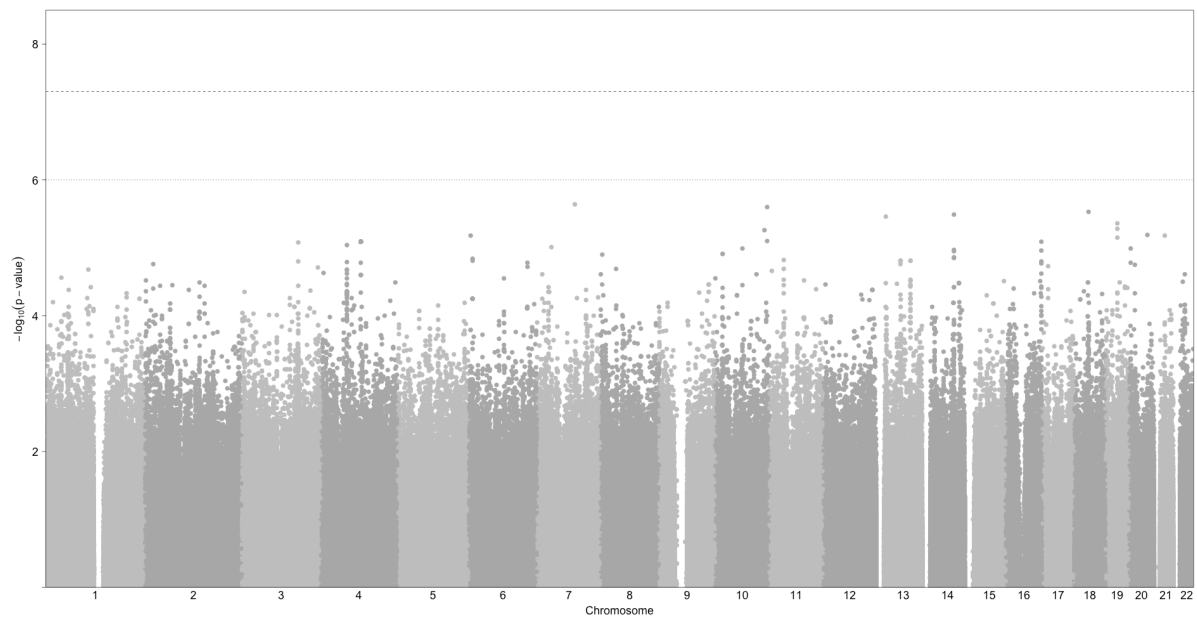

**Supplementary Figure S38.** Manhattan plot for the pyruvate GWAS. The dashed line denotes 'genome-wide significance' threshold of  $p < 5 \times 10^{-8}$  whilst the dotted line denotes 'suggestive significance' threshold of  $p < 1 \times 10^{-6}$ . SNPs with a minor allele frequency (MAF)  $< 1\%$  were removed.



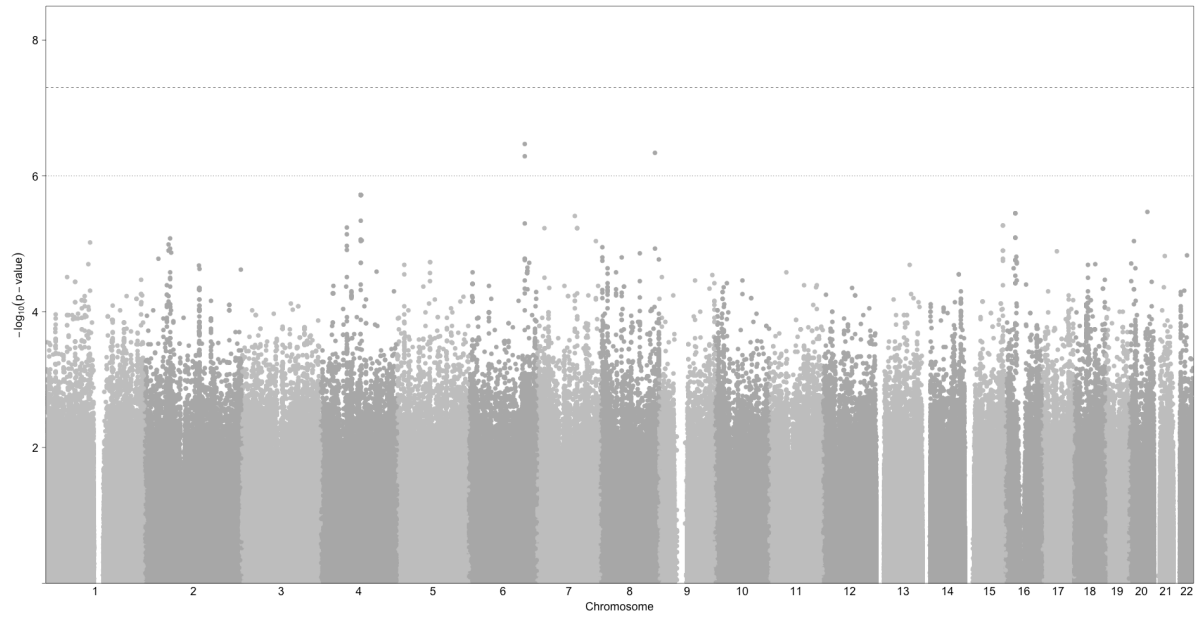

**Supplementary Figure S39.** Manhattan plot for the tyrosine GWAS. The dashed line denotes 'genome-wide significance' threshold of  $p < 5 \times 10^{-8}$  whilst the dotted line denotes 'suggestive significance' threshold of  $p < 1 \times 10^{-6}$ . SNPs with a minor allele frequency (MAF)  $< 1\%$  were removed.

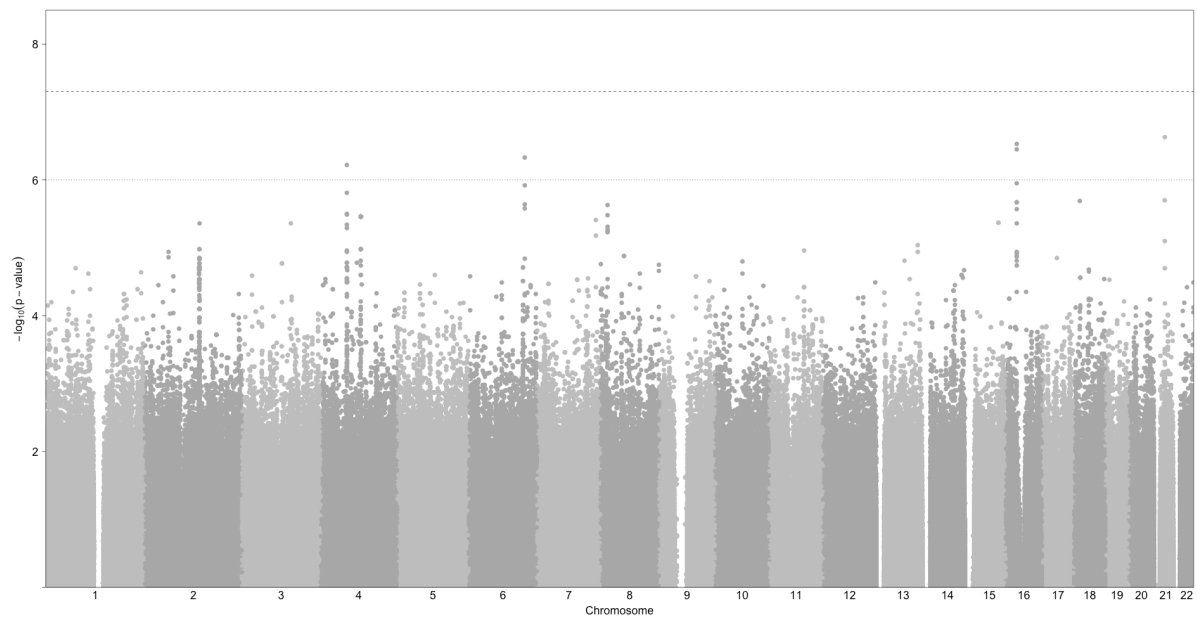

**Supplementary Figure S40.** Manhattan plot for the valine GWAS. The dashed line denotes 'genome-wide significance' threshold of  $p < 5 \times 10^{-8}$  whilst the dotted line denotes 'suggestive significance' threshold of  $p < 1 \times 10^{-6}$ . SNPs with a minor allele frequency (MAF)  $< 1\%$  were removed.

## Supplementary Tables

**Supplementary Table S1.** Resonance assignments of key metabolites in plasma. The resonances of metabolites were assigned in Chenomx NMR Suite 8.2 and HSQC experiments. Presented are both  $^1\text{H}$  and  $^{13}\text{C}$  chemical shifts of key metabolites. \* indicates chemical shift region reported in the Human Metabolome Database spectra but not observed in collected  $^1\text{H}$  NMR spectra.

| Metabolite        | Chemical shift: $\delta^1\text{H}$ [ppm] (multiplicity) / $\delta^{13}\text{C}$ [ppm]                             |
|-------------------|-------------------------------------------------------------------------------------------------------------------|
| 3-hydroxybutyrate | 4.137 (m)/68.78, 2.385 (dd)/49.35, 2.296 (dd)/49.27, 1.184 (d)/24.6                                               |
| Acetate           | 1.903 (m)/26.09                                                                                                   |
| Acetoacetate      | 3.427 (s)/56.2, 2.267(s)/32.4                                                                                     |
| Acetone           | 2.216 (s)/32.94                                                                                                   |
| Alanine           | 3.774 (q)/53.28, 1.466 (d)/18.97                                                                                  |
| Citrate           | 2.664 (d)/48.711*, 2.525 (d)/48.711*                                                                              |
| Creatine          | 3.914 (s)/58.45, 3.026(s)/39.4                                                                                    |
| Creatinine        | 4.039 (s)/59.07, 3.029 (s)/32.85                                                                                  |
| Formate           | 8.445 (s)/172.412*                                                                                                |
| Glucose           | 5.224 (d)/94.5, 4.634 (d)/98.712*, 3.888 (dd), 3.826 (m), 3.711 (m), 3.526 (dd), 3.367 (m), 3.400 (m), 3.235 (dd) |
| Glycerol          | 3.775 (m)*, 3.644 (m), 3.555 (m)                                                                                  |
| Glycine           | 3.557 (s)/44.31                                                                                                   |
| Lactate           | 4.098 (q)/71.5, 1.314 (d)/22.903*                                                                                 |
| Leucine           | 3.741 (m)*/56.211*, 1.703 (m)*/42.596*, 1.708 (m)*/26.778*, 0.952 (d)/24.84, 0.941 (d)/23.73                      |
| Methanol          | 3.349 (s)/51.73                                                                                                   |
| Myo inositol      | 4.057 (t)/77.15, 3.616 (t)/75.133*, 3.524 (dd)*/73.959*, 3.273 (t)/72.55                                          |
| Phenylalanine     | 7.413 (m)/131.7, 7.360 (m)/130.2, 7.319 (m)/132.1, 3.979 (m)/58.933*, 3.268 (m)/39.3, 3.106 (m)/39.3              |
| Pyruvate          | 2.358 (s)/29.4                                                                                                    |
| Tyrosine          | 7.182 (m)/133.18, 6.887 (m)/118.65, 3.934 (dd)/58.83, 3.188 (dd)*/38.271*, 3.070 (dd)*/38.271*                    |
| Valine            | 3.595 (d)/63.28, 2.258 (m)/32.07, 1.028 (d)/20.75, 0.976 (d)/19.17                                                |

**Supplementary Table S2.** List of metabolite sample size and number of excluded outliers

| Metabolite Phenotype | Sample Size | Number of Excluded Outliers |
|----------------------|-------------|-----------------------------|
| 3-hydroxybutyrate    | 172         | 9                           |
| Acetate              | 205         | 3                           |
| Acetoacetate         | 202         | 6                           |
| Acetone              | 222         | 5                           |
| Alanine              | 224         | 4                           |
| Citrate              | 198         | 4                           |
| Creatine             | 224         | 4                           |
| Creatinine           | 224         | 8                           |
| Formate              | 230         | 1                           |
| Glucose              | 224         | 4                           |
| Glycerol             | 201         | 3                           |
| Glycine              | 224         | 4                           |
| Lactate              | 224         | 5                           |
| Leucine              | 223         | 2                           |
| Methanol             | 222         | 0                           |
| Myo inositol         | 181         | 5                           |
| Phenylalanine        | 223         | 4                           |
| Pyruvate             | 213         | 7                           |
| Tyrosine             | 224         | 3                           |
| Valine               | 223         | 1                           |

**Supplementary Table S3.** Genetic inflation factors ( $\lambda$ ) for each metabolite GWAS.

| Metabolite Phenotype | Genetic Inflation Factor ( $\lambda$ ) |
|----------------------|----------------------------------------|
| 3-hydroxybutyrate    | 1.002                                  |
| Acetate              | 0.995                                  |
| Acetoacetate         | 1.000                                  |
| Acetone              | 1.007                                  |
| Alanine              | 0.991                                  |
| Citrate              | 0.985                                  |
| Creatine             | 1.001                                  |
| Creatinine           | 1.004                                  |
| Formate              | 0.996                                  |
| Glucose              | 0.995                                  |
| Glycerol             | 0.991                                  |
| Glycine              | 0.988                                  |
| Lactate              | 0.994                                  |
| Leucine              | 0.986                                  |
| Methanol             | 0.995                                  |
| Myo inositol         | 0.991                                  |
| Phenylalanine        | 0.992                                  |
| Pyruvate             | 0.987                                  |
| Tyrosine             | 0.990                                  |
| Valine               | 0.987                                  |

**Supplementary Table S4.** Imputation information for genome-wide significant SNPs ( $p$ -value  $\leq 5 \times 10^{-8}$ ).

| Phenotype                | SNP        | Genotyped/Imputed | R <sup>2</sup> |
|--------------------------|------------|-------------------|----------------|
| <b>3-hydroxybutyrate</b> | rs2456680  | imputed           | 0.9840         |
| <b>acetoacetate</b>      | rs2213037  | imputed           | 0.9661         |
| <b>acetoacetate</b>      | rs10014222 | imputed           | 0.9671         |
| <b>creatinine</b>        | rs6851961  | genotyped         |                |

**Supplementary Table S5.** Lead SNPs that did not reach genome-wide significance but reached the threshold for suggestive significance ( $p \leq 1 \times 10^{-5}$ ).

| PHENOTYPE           | SNP         | CHR | BP        | Imputed/<br>Genotyped | EA | NEA | MAF    | BETA   | SE     | P        | Variant type   | Gene         |
|---------------------|-------------|-----|-----------|-----------------------|----|-----|--------|--------|--------|----------|----------------|--------------|
| <b>creatinine</b>   | rs151283409 | 13  | 95025755  | Imputed               | A  | G   | 0.1215 | 0.7766 | 0.1388 | 7.00E-08 | Intron Variant | GPC6         |
| <b>methanol</b>     | rs28730582  | 4   | 100005318 | Imputed               | C  | T   | 0.9747 | 1.7099 | 0.3079 | 8.28E-08 | Intron Variant | ADH5         |
| <b>formate</b>      | rs974680    | 21  | 27011112  | Imputed               | A  | G   | 0.1498 | 0.664  | 0.1198 | 8.39E-08 | Intron Variant | JAM2         |
| <b>leucine</b>      | rs974680    | 21  | 27011112  | Imputed               | A  | G   | 0.1498 | 0.6796 | 0.1231 | 9.77E-08 | Intron Variant | JAM2         |
| <b>creatine</b>     | rs10118337  | 9   | 133874462 | Imputed               | T  | G   | 0.6538 | 0.501  | 0.0908 | 1.00E-07 | Intergenic     |              |
| <b>acetate</b>      | rs974680    | 21  | 27011112  | Imputed               | A  | G   | 0.1498 | 0.7147 | 0.1313 | 1.57E-07 | Intron Variant | JAM2         |
| <b>acetate</b>      | rs2016139   | 8   | 17374436  | Imputed               | T  | G   | 0.6063 | 0.5616 | 0.1035 | 1.73E-07 | Intron Variant | SLC7A2       |
| <b>creatinine</b>   | rs78464812  | 7   | 12732041  | Imputed               | A  | G   | 0.6397 | 0.5249 | 0.0975 | 1.95E-07 | Intergenic     |              |
| <b>glucose</b>      | rs974680    | 21  | 27011112  | Imputed               | A  | G   | 0.1498 | 0.6546 | 0.1218 | 2.05E-07 | Intron Variant | JAM2         |
| <b>leucine</b>      | rs62440904  | 6   | 139825903 | Imputed               | C  | T   | 0.6447 | 0.5142 | 0.0957 | 2.05E-07 | Intergenic     |              |
| <b>valine</b>       | rs974680    | 21  | 27011112  | Imputed               | A  | G   | 0.1498 | 0.6591 | 0.1234 | 2.37E-07 | Intron Variant | JAM2         |
| <b>creatine</b>     | rs2161379   | 4   | 181524552 | Imputed               | A  | G   | 0.6144 | 0.4772 | 0.0894 | 2.39E-07 | Intergenic     |              |
| <b>alanine</b>      | rs974680    | 21  | 27011112  | Imputed               | A  | G   | 0.1498 | 0.6726 | 0.126  | 2.43E-07 | Intron Variant | JAM2         |
| <b>valine</b>       | rs4787936   | 16  | 27178152  | Imputed               | A  | T   | 0.6407 | 0.5146 | 0.0972 | 2.96E-07 | Intron Variant | LINC02129    |
| <b>formate</b>      | rs1842955   | 4   | 65309678  | Genotyped             | C  | T   | 0.4443 | 0.4578 | 0.0866 | 3.03E-07 | Intergenic     |              |
| <b>leucine</b>      | rs79424822  | 15  | 83626379  | Imputed               | C  | T   | 0.0142 | 1.7162 | 0.3248 | 3.13E-07 | Intron Variant | HOMER2       |
| <b>formate</b>      | rs28730582  | 4   | 100005318 | Imputed               | C  | T   | 0.9747 | 1.6442 | 0.3123 | 3.33E-07 | Intron Variant | ADH5         |
| <b>tyrosine</b>     | rs62440904  | 6   | 139825903 | Imputed               | C  | T   | 0.6447 | 0.5048 | 0.0959 | 3.42E-07 | Intergenic     |              |
| <b>acetoacetate</b> | rs117633404 | 18  | 75224932  | Imputed               | T  | G   | 0.9686 | 1.3274 | 0.2519 | 3.74E-07 | Intron Variant | LOC107985172 |

|                          |             |    |           |           |   |   |        |        |        |          |                |                         |
|--------------------------|-------------|----|-----------|-----------|---|---|--------|--------|--------|----------|----------------|-------------------------|
| <b>creatinine</b>        | rs291844    | 5  | 102859998 | Imputed   | T | A | 0.5425 | 0.4719 | 0.0899 | 3.83E-07 | Intergenic     |                         |
| <b>citrate</b>           | rs7799107   | 7  | 68315408  | Imputed   | G | A | 0.6751 | 0.522  | 0.0996 | 4.35E-07 | Intergenic     |                         |
| <b>tyrosine</b>          | rs2199922   | 8  | 136244326 | Imputed   | T | C | 0.1002 | 0.8248 | 0.1585 | 4.57E-07 | Intergenic     |                         |
| <b>valine</b>            | rs2430189   | 6  | 139825880 | Imputed   | C | T | 0.5    | 0.4801 | 0.0923 | 4.64E-07 | Intergenic     |                         |
| <b>leucine</b>           | rs12922798  | 16 | 27179711  | Imputed   | G | A | 0.7287 | 0.5632 | 0.1085 | 4.89E-07 | Intron Variant | LINC02129               |
| <b>glycine</b>           | rs140738918 | 5  | 83206174  | Imputed   | G | A | 0.0294 | 1.2852 | 0.2476 | 4.91E-07 | Intergenic     |                         |
| <b>acetoacetate</b>      | rs7850975   | 9  | 133875164 | Imputed   | G | A | 0.251  | 0.5688 | 0.1094 | 5.23E-07 | Intergenic     |                         |
| <b>glucose</b>           | rs9484280   | 6  | 139826062 | Imputed   | A | G | 0.5587 | 0.4634 | 0.0895 | 5.25E-07 | Intergenic     |                         |
| <b>acetoacetate</b>      | rs78503133  | 4  | 179580467 | Imputed   | G | A | 0.919  | 0.8832 | 0.1705 | 5.72E-07 | Intergenic     |                         |
| <b>glycine</b>           | rs4281711   | 16 | 27179458  | Imputed   | C | T | 0.6356 | 0.5011 | 0.0971 | 5.73E-07 | Intron Variant | LINC02129               |
| <b>valine</b>            | rs1842955   | 4  | 65309678  | Genotyped | C | T | 0.4443 | 0.4524 | 0.0879 | 5.99E-07 | Intergenic     |                         |
| <b>creatine</b>          | rs12152988  | 5  | 137954954 | Imputed   | G | A | 0.9767 | 1.6023 | 0.3121 | 6.45E-07 | Intergenic     |                         |
| <b>citrate</b>           | rs28730582  | 4  | 100005318 | Imputed   | C | T | 0.9747 | 1.5908 | 0.3102 | 7.31E-07 | Intron Variant | ADH5                    |
| <b>lactate</b>           | rs2016139   | 8  | 17374436  | Imputed   | T | G | 0.6063 | 0.5124 | 0.1005 | 7.53E-07 | Intron Variant | SLC7A2                  |
| <b>glycerol</b>          | rs62216543  | 21 | 27960090  | Imputed   | A | G | 0.916  | 0.8766 | 0.1713 | 7.61E-07 | Intergenic     |                         |
| <b>leucine</b>           | rs6851961   | 4  | 65351771  | Genotyped | G | A | 0.4868 | 0.4709 | 0.0924 | 7.67E-07 | Intergenic     |                         |
| <b>formate</b>           | rs72782684  | 10 | 9051715   | Genotyped | G | A | 0.0233 | 1.5249 | 0.2998 | 7.81E-07 | Intergenic     |                         |
| <b>phenylalanine</b>     | rs28510752  | 4  | 65306505  | Imputed   | C | T | 0.5283 | 0.4448 | 0.0873 | 7.85E-07 | Intergenic     |                         |
| <b>glucose</b>           | rs75182077  | 3  | 101671963 | Imputed   | T | C | 0.8856 | 0.7287 | 0.1431 | 7.87E-07 | Intron Variant | LINC02085               |
| <b>3-hydroxybutyrate</b> | rs6983700   | 8  | 101516602 | Genotyped | T | C | 0.1174 | 0.8091 | 0.1576 | 8.21E-07 | Intergenic     |                         |
| <b>methanol</b>          | rs75336470  | 2  | 33726460  | Imputed   | A | G | 0.9342 | 0.8754 | 0.1723 | 8.22E-07 | Intron Variant | RASGRP3                 |
| <b>acetoacetate</b>      | rs76485411  | 3  | 170298562 | Imputed   | G | A | 0.9879 | 2.5108 | 0.4922 | 8.26E-07 | Intron Variant | SLC7A14-AS1,<br>SLC7A14 |
| <b>formate</b>           | rs75336470  | 2  | 33726460  | Imputed   | A | G | 0.9342 | 0.8562 | 0.1688 | 8.29E-07 | Intron Variant | RASGRP3                 |
| <b>phenylalanine</b>     | rs72974161  | 2  | 136802456 | Imputed   | C | T | 0.9069 | 0.8339 | 0.1644 | 8.65E-07 | Intergenic     |                         |
| <b>glycine</b>           | rs4282492   | 7  | 147217895 | Imputed   | T | A | 0.7986 | 0.5887 | 0.1161 | 8.67E-07 | Intron Variant | CNTNAP2                 |

|                   |             |    |           |           |   |   |        |        |        |          |                     |              |
|-------------------|-------------|----|-----------|-----------|---|---|--------|--------|--------|----------|---------------------|--------------|
| glucose           | rs28730582  | 4  | 100005318 | Imputed   | C | T | 0.9747 | 1.5551 | 0.3079 | 9.48E-07 | Intron Variant      | ADH5         |
| creatinine        | rs34324511  | 9  | 133873823 | Imputed   | G | A | 0.917  | 0.916  | 0.1817 | 1.01E-06 | Intergenic          |              |
| glucose           | rs4116764   | 18 | 15122329  | Imputed   | T | C | 0.8877 | 0.7219 | 0.1436 | 1.07E-06 | Intergenic          |              |
| 3-hydroxybutyrate | rs7850975   | 9  | 133875164 | Imputed   | G | A | 0.251  | 0.6078 | 0.1199 | 1.11E-06 | Intergenic          |              |
| glycine           | rs974680    | 21 | 27011112  | Imputed   | A | G | 0.1498 | 0.6371 | 0.127  | 1.12E-06 | Intron Variant      | JAM2         |
| acetoacetate      | rs116974960 | 20 | 6245349   | Imputed   | C | G | 0.9889 | 2.4758 | 0.4928 | 1.18E-06 | Intergenic          |              |
| methanol          | rs11131536  | 4  | 65306853  | Imputed   | C | A | 0.4899 | 0.4276 | 0.0855 | 1.20E-06 | Intergenic          |              |
| formate           | rs9842287   | 3  | 122756143 | Imputed   | T | C | 0.2328 | 0.5582 | 0.1118 | 1.21E-06 | Intergenic          |              |
| acetoacetate      | rs189418887 | 10 | 35271898  | Imputed   | T | G | 0.9818 | 1.7366 | 0.3465 | 1.25E-06 | Intergenic          |              |
| glycine           | rs77762405  | 4  | 102560900 | Imputed   | G | C | 0.8927 | 0.7593 | 0.1528 | 1.39E-06 | Intergenic          |              |
| lactate           | rs6920957   | 6  | 151043035 | Imputed   | G | A | 0.6923 | 0.484  | 0.0974 | 1.39E-06 | Intron Variant      | PLEKHG1      |
| acetate           | rs34003508  | 5  | 18792823  | Imputed   | C | T | 0.2308 | 0.5513 | 0.1108 | 1.44E-06 | Intergenic          |              |
| citrate           | rs7196914   | 16 | 4194688   | Imputed   | G | A | 0.4251 | 0.5045 | 0.1013 | 1.44E-06 | Intergenic          |              |
| 3-hydroxybutyrate | rs73223826  | 4  | 11471671  | Imputed   | C | T | 0.9504 | 1.2711 | 0.2539 | 1.47E-06 | Intron Variant      | LOC107986178 |
| acetoacetate      | rs12830228  | 12 | 55525832  | Imputed   | C | T | 0.1518 | 0.7265 | 0.146  | 1.48E-06 | 3 Prime UTR Variant | OR9K2        |
| glycerol          | rs16869609  | 4  | 20449733  | Imputed   | T | C | 0.1275 | 0.7441 | 0.1498 | 1.51E-06 | Intron Variant      | SLIT2        |
| glycerol          | rs974680    | 21 | 27011112  | Imputed   | A | G | 0.1498 | 0.6524 | 0.1313 | 1.52E-06 | Intron Variant      | JAM2         |
| methanol          | rs62440904  | 6  | 139825903 | Imputed   | C | T | 0.6447 | 0.4756 | 0.0961 | 1.52E-06 | Intergenic          |              |
| phenylalanine     | rs4281711   | 16 | 27179458  | Imputed   | C | T | 0.6356 | 0.4857 | 0.0982 | 1.55E-06 | Intron Variant      | LINC02129    |
| glycine           | rs62440904  | 6  | 139825903 | Imputed   | C | T | 0.6447 | 0.4773 | 0.0966 | 1.59E-06 | Intergenic          |              |
| lactate           | rs75987636  | 11 | 15830261  | Imputed   | A | G | 0.9626 | 1.2083 | 0.2446 | 1.59E-06 | Intergenic          |              |
| creatinine        | rs4126639   | 1  | 54001823  | Imputed   | G | A | 0.417  | 0.4764 | 0.0965 | 1.63E-06 | Intron Variant      | GLIS1        |
| leucine           | rs1842955   | 4  | 65309678  | Genotyped | C | T | 0.4443 | 0.4374 | 0.0887 | 1.65E-06 | Intergenic          |              |
| citrate           | rs1885604   | 14 | 81763955  | Imputed   | C | T | 0.7844 | 0.6055 | 0.1225 | 1.71E-06 | Intron Variant      | STON2        |

|                          |             |    |           |           |   |   |        |        |        |          |                |              |
|--------------------------|-------------|----|-----------|-----------|---|---|--------|--------|--------|----------|----------------|--------------|
| <b>citrate</b>           | rs9524472   | 13 | 95039482  | Imputed   | G | A | 0.1862 | 0.5964 | 0.1207 | 1.72E-06 | Intron Variant | GPC6         |
| <b>acetone</b>           | rs2631539   | 17 | 50364354  | Imputed   | G | A | 0.9524 | 1.0919 | 0.2222 | 1.80E-06 | Intergenic     |              |
| <b>tyrosine</b>          | rs28730582  | 4  | 100005318 | Imputed   | C | T | 0.9747 | 1.5359 | 0.3134 | 1.89E-06 | Intron Variant | ADH5         |
| <b>creatine</b>          | rs71424462  | 14 | 101938613 | Imputed   | T | C | 0.9615 | 1.4046 | 0.2874 | 2.02E-06 | Intron Variant | LOC105370672 |
| <b>creatinine</b>        | rs13154681  | 5  | 28647594  | Imputed   | T | C | 0.0415 | 1.0094 | 0.2065 | 2.03E-06 | Intergenic     |              |
| <b>valine</b>            | rs151068546 | 18 | 13863862  | Imputed   | C | T | 0.9747 | 1.4844 | 0.3039 | 2.04E-06 | Intergenic     |              |
| <b>glycine</b>           | rs42845     | 2  | 59109090  | Imputed   | C | G | 0.8107 | 0.589  | 0.1206 | 2.05E-06 | Intron Variant | LINC01122    |
| <b>citrate</b>           | rs140546776 | 10 | 116654538 | Imputed   | T | G | 0.0132 | 2.4008 | 0.4899 | 2.08E-06 | Intron Variant | FHIP2A       |
| <b>citrate</b>           | rs6560041   | 9  | 90495370  | Genotyped | T | C | 0.496  | 0.4799 | 0.0982 | 2.20E-06 | Intron Variant | LOC497256    |
| <b>citrate</b>           | rs2969415   | 7  | 96411589  | Imputed   | A | G | 0.2834 | 0.5531 | 0.1133 | 2.25E-06 | Intergenic     |              |
| <b>alanine</b>           | rs2213906   | 8  | 17377057  | Imputed   | G | C | 0.6215 | 0.4947 | 0.1018 | 2.27E-06 | Intron Variant | SLC7A2       |
| <b>methanol</b>          | rs12414680  | 10 | 21233596  | Imputed   | G | T | 0.1953 | 0.5486 | 0.1129 | 2.27E-06 | Intron Variant | NEBL         |
| <b>pyruvate</b>          | rs4729162   | 7  | 94516931  | Imputed   | G | C | 0.1761 | 0.6448 | 0.1324 | 2.28E-06 | Intergenic     |              |
| <b>valine</b>            | rs2213906   | 8  | 17377057  | Imputed   | G | C | 0.6215 | 0.4932 | 0.1016 | 2.33E-06 | Intron Variant | SLC7A2       |
| <b>acetoacetate</b>      | rs2725566   | 15 | 54233434  | Imputed   | T | A | 0.416  | 0.49   | 0.1006 | 2.38E-06 | Intron Variant | UNC13C       |
| <b>acetoacetate</b>      | rs11016273  | 10 | 130290907 | Imputed   | G | A | 0.7682 | 0.5202 | 0.1069 | 2.40E-06 | Intergenic     |              |
| <b>methanol</b>          | rs974680    | 21 | 27011112  | Imputed   | A | G | 0.1498 | 0.6053 | 0.1249 | 2.41E-06 | Intron Variant | JAM2         |
| <b>acetone</b>           | rs115858347 | 4  | 19058455  | Imputed   | T | C | 0.0435 | 1.1475 | 0.2366 | 2.42E-06 | Intergenic     |              |
| <b>phenylalanine</b>     | rs12196202  | 6  | 139826787 | Imputed   | C | T | 0.6437 | 0.472  | 0.0975 | 2.47E-06 | Intergenic     |              |
| <b>pyruvate</b>          | rs881078    | 10 | 130258262 | Imputed   | T | C | 0.4919 | 0.485  | 0.1    | 2.49E-06 | Intergenic     |              |
| <b>3-hydroxybutyrate</b> | rs144759118 | 21 | 22274187  | Imputed   | C | T | 0.9312 | 1.0695 | 0.2191 | 2.55E-06 | Intergenic     |              |
| <b>glycine</b>           | rs2213906   | 8  | 17377057  | Imputed   | G | C | 0.6215 | 0.4903 | 0.1014 | 2.57E-06 | Intron Variant | SLC7A2       |
| <b>acetoacetate</b>      | rs72974161  | 2  | 136802456 | Imputed   | C | T | 0.9069 | 0.8181 | 0.1687 | 2.60E-06 | Intergenic     |              |
| <b>lactate</b>           | rs11060939  | 12 | 130968456 | Imputed   | A | G | 0.248  | 0.515  | 0.1067 | 2.67E-06 | Intron Variant | RIMBP2       |
| <b>leucine</b>           | rs4116764   | 18 | 15122329  | Imputed   | T | C | 0.8877 | 0.7052 | 0.1462 | 2.68E-06 | Intergenic     |              |

|                   |             |    |           |           |   |   |        |        |        |          |                |              |
|-------------------|-------------|----|-----------|-----------|---|---|--------|--------|--------|----------|----------------|--------------|
| leucine           | rs42845     | 2  | 59109090  | Imputed   | C | G | 0.8107 | 0.5874 | 0.1218 | 2.68E-06 | Intron Variant | LINC01122    |
| creatinine        | rs76902478  | 11 | 87370685  | Imputed   | G | A | 0.9474 | 0.967  | 0.2004 | 2.70E-06 | Intron Variant | LOC107984361 |
| creatine          | rs72696922  | 14 | 96078199  | Genotyped | T | G | 0.0192 | 1.6074 | 0.3335 | 2.74E-06 | Intergenic     |              |
| glycine           | rs72974161  | 2  | 136802456 | Imputed   | C | T | 0.9069 | 0.7878 | 0.1635 | 2.75E-06 | Intergenic     |              |
| alanine           | rs140738918 | 5  | 83206174  | Imputed   | G | A | 0.0294 | 1.2051 | 0.2501 | 2.77E-06 | Intergenic     |              |
| alanine           | rs62440904  | 6  | 139825903 | Imputed   | C | T | 0.6447 | 0.4671 | 0.097  | 2.78E-06 | Intergenic     |              |
| creatinine        | rs34347878  | 12 | 4308303   | Imputed   | A | G | 0.0405 | 1.0647 | 0.2209 | 2.78E-06 | Intron Variant | LOC105369612 |
| glycerol          | rs7923287   | 10 | 85841432  | Imputed   | T | A | 0.7561 | 0.56   | 0.1159 | 2.81E-06 | Intergenic     |              |
| glucose           | rs117919743 | 15 | 44671417  | Imputed   | C | A | 0.0476 | 1.0538 | 0.2189 | 2.83E-06 | Intron Variant | GOLM2        |
| alanine           | rs77762405  | 4  | 102560900 | Imputed   | G | C | 0.8927 | 0.7346 | 0.1527 | 2.87E-06 | Intergenic     |              |
| creatinine        | rs1989820   | 5  | 135996417 | Imputed   | A | G | 0.3421 | 0.4785 | 0.0995 | 2.89E-06 | Intergenic     |              |
| myo-inositol      | rs79419630  | 11 | 131250632 | Imputed   | A | G | 0.0911 | 0.8697 | 0.1796 | 2.92E-06 | Intron Variant | NTM          |
| 3-hydroxybutyrate | rs2584557   | 8  | 12911318  | Imputed   | T | C | 0.4615 | 0.4681 | 0.0965 | 2.93E-06 | Intergenic     |              |
| acetoacetate      | rs2441739   | 10 | 68249299  | Imputed   | G | A | 0.5111 | 0.4459 | 0.0925 | 2.94E-06 | Intron Variant | CTNNA3       |
| pyruvate          | rs12605861  | 18 | 35828418  | Imputed   | G | A | 0.418  | 0.4842 | 0.1006 | 2.96E-06 | Intergenic     |              |
| acetone           | rs499053    | 11 | 97980407  | Imputed   | T | G | 0.664  | 0.4614 | 0.096  | 2.97E-06 | Intergenic     |              |
| creatinine        | rs1842955   | 4  | 65309678  | Genotyped | C | T | 0.4443 | 0.4286 | 0.0893 | 3.06E-06 | Intergenic     |              |
| acetoacetate      | rs272564    | 1  | 45012273  | Imputed   | A | C | 0.7328 | 0.5388 | 0.112  | 3.07E-06 | Intron Variant | RNF220       |
| glucose           | rs13154681  | 5  | 28647594  | Imputed   | T | C | 0.0415 | 0.9653 | 0.2014 | 3.10E-06 | Intergenic     |              |
| 3-hydroxybutyrate | rs76766851  | 10 | 20868527  | Imputed   | G | A | 0.9777 | 1.983  | 0.4102 | 3.14E-06 | Intergenic     |              |
| alanine           | rs77569096  | 8  | 128468955 | Imputed   | G | A | 0.1933 | 0.5632 | 0.1176 | 3.17E-06 | Intron Variant | CASC8        |
| acetate           | rs313294    | 2  | 126076783 | Imputed   | G | C | 0.581  | 0.4629 | 0.0964 | 3.18E-06 | Intergenic     |              |
| valine            | rs6851961   | 4  | 65351771  | Genotyped | G | A | 0.4868 | 0.4447 | 0.0929 | 3.19E-06 | Intergenic     |              |
| glycerol          | rs11908225  | 20 | 52754251  | Imputed   | A | G | 0.9808 | 1.2966 | 0.2702 | 3.24E-06 | Intergenic     |              |
| citrate           | rs813522    | 20 | 16053367  | Imputed   | G | A | 0.5344 | 0.4925 | 0.1026 | 3.25E-06 | Intergenic     |              |



|                     |             |    |           |           |   |   |        |        |        |          |                |                        |
|---------------------|-------------|----|-----------|-----------|---|---|--------|--------|--------|----------|----------------|------------------------|
| <b>creatine</b>     | rs75450658  | 3  | 87631715  | Imputed   | A | G | 0.0698 | 0.9017 | 0.1886 | 3.25E-06 | Intergenic     |                        |
| <b>pyruvate</b>     | rs61995266  | 14 | 79428666  | Imputed   | T | C | 0.9221 | 0.8343 | 0.1741 | 3.25E-06 | Intron Variant | NRXN3                  |
| <b>creatinine</b>   | rs624882    | 11 | 119386445 | Imputed   | T | C | 0.3138 | 0.5207 | 0.1088 | 3.26E-06 | Intergenic     |                        |
| <b>glycine</b>      | rs28730582  | 4  | 100005318 | Imputed   | C | T | 0.9747 | 1.492  | 0.3122 | 3.31E-06 | Intron Variant | ADH5                   |
| <b>glucose</b>      | rs1554171   | 16 | 27174629  | Imputed   | G | A | 0.7713 | 0.5455 | 0.1143 | 3.37E-06 | Intron Variant | LINC02129              |
| <b>myo-inositol</b> | rs62323709  | 4  | 154168467 | Imputed   | G | A | 0.1316 | 0.7205 | 0.1499 | 3.39E-06 | Intron Variant | TRIM2,<br>LOC105377496 |
| <b>tyrosine</b>     | rs62201701  | 20 | 46359257  | Imputed   | C | T | 0.9818 | 1.5675 | 0.3286 | 3.42E-06 | Intron Variant | SULF2                  |
| <b>acetate</b>      | rs79278805  | 10 | 22686205  | Genotyped | A | G | 0.9575 | 1.1402 | 0.2384 | 3.43E-06 | Intron Variant | SPAG6                  |
| <b>glycerol</b>     | rs2402901   | 7  | 128273555 | Imputed   | C | T | 0.9808 | 1.5931 | 0.3329 | 3.43E-06 | Intron Variant | LOC101928451           |
| <b>valine</b>       | rs28730582  | 4  | 100005318 | Imputed   | C | T | 0.9747 | 1.4961 | 0.3137 | 3.43E-06 | Intron Variant | ADH5                   |
| <b>glucose</b>      | rs611421    | 1  | 100540289 | Imputed   | A | G | 0.8613 | 0.6577 | 0.1379 | 3.44E-06 | Intron Variant | MFSD14A                |
| <b>pyruvate</b>     | rs147480013 | 13 | 23654393  | Imputed   | C | G | 0.0263 | 1.3109 | 0.2744 | 3.47E-06 | Intergenic     |                        |
| <b>formate</b>      | rs17190458  | 20 | 12602813  | Imputed   | A | T | 0.0456 | 1.0331 | 0.217  | 3.50E-06 | Intergenic     |                        |
| <b>tyrosine</b>     | rs249938    | 16 | 23626521  | Imputed   | T | C | 0.0597 | 0.9169 | 0.1925 | 3.51E-06 | Intron Variant | PALB2                  |
| <b>citrate</b>      | rs1836445   | 20 | 81979     | Imputed   | C | T | 0.2348 | 0.553  | 0.1157 | 3.55E-06 | Intergenic     |                        |
| <b>formate</b>      | rs117054545 | 7  | 100375134 | Imputed   | G | A | 0.9686 | 1.144  | 0.2405 | 3.57E-06 | Intron Variant | ZAN                    |
| <b>alanine</b>      | rs72974161  | 2  | 136802456 | Imputed   | C | T | 0.9069 | 0.7813 | 0.1643 | 3.66E-06 | Intergenic     |                        |
| <b>citrate</b>      | rs115698394 | 4  | 136303552 | Imputed   | G | C | 0.0122 | 2.3466 | 0.4915 | 3.66E-06 | Intergenic     |                        |
| <b>leucine</b>      | rs28730582  | 4  | 100005318 | Imputed   | C | T | 0.9747 | 1.4929 | 0.3141 | 3.69E-06 | Intron Variant | ADH5                   |
| <b>alanine</b>      | rs78997301  | 10 | 21569519  | Imputed   | G | A | 0.0142 | 1.9071 | 0.4012 | 3.71E-06 | Intron Variant | NEBL                   |
| <b>glucose</b>      | rs4282492   | 7  | 147217895 | Imputed   | T | A | 0.7986 | 0.5505 | 0.1158 | 3.72E-06 | Intron Variant | CNTNAP2                |
| <b>valine</b>       | rs2008168   | 7  | 147216870 | Imputed   | T | C | 0.7783 | 0.5603 | 0.1181 | 3.86E-06 | Intron Variant | CNTNAP2                |
| <b>tyrosine</b>     | rs4729162   | 7  | 94516931  | Imputed   | G | C | 0.1761 | 0.6159 | 0.1299 | 3.89E-06 | Intergenic     |                        |
| <b>methanol</b>     | rs151200016 | 2  | 242593877 | Imputed   | G | A | 0.1559 | 0.6102 | 0.1287 | 3.91E-06 | Intron Variant | ATG4B                  |
| <b>glycerol</b>     | rs62215596  | 20 | 52689292  | Imputed   | C | T | 0.9474 | 1.0004 | 0.2104 | 3.94E-06 | Intergenic     |                        |
| <b>creatinine</b>   | rs61995266  | 14 | 79428666  | Imputed   | T | C | 0.9221 | 0.8201 | 0.1731 | 3.99E-06 | Intron Variant | NRXN3                  |

|                          |             |    |           |         |   |   |        |        |        |          |                         |              |
|--------------------------|-------------|----|-----------|---------|---|---|--------|--------|--------|----------|-------------------------|--------------|
| <b>glucose</b>           | rs1555049   | 22 | 50712925  | Imputed | G | C | 0.4008 | 0.4482 | 0.0946 | 4.00E-06 | 500B Downstream Variant | PLXNB2       |
| <b>myo-inositol</b>      | rs117633404 | 18 | 75224932  | Imputed | T | G | 0.9686 | 1.244  | 0.2609 | 4.02E-06 | Intron Variant          | LOC107985172 |
| <b>acetate</b>           | rs28730582  | 4  | 100005318 | Imputed | C | T | 0.9747 | 1.5812 | 0.3332 | 4.04E-06 | Intron Variant          | ADH5         |
| <b>formate</b>           | rs10187054  | 2  | 136388473 | Imputed | T | C | 0.8715 | 0.6756 | 0.1429 | 4.06E-06 | Intron Variant          | R3HDM1       |
| <b>glycine</b>           | rs75336470  | 2  | 33726460  | Imputed | A | G | 0.9342 | 0.8277 | 0.1749 | 4.08E-06 | Intron Variant          | RASGRP3      |
| <b>methanol</b>          | rs2008168   | 7  | 147216870 | Imputed | T | C | 0.7783 | 0.5578 | 0.1179 | 4.08E-06 | Intron Variant          | CNTNAP2      |
| <b>glycerol</b>          | rs4787936   | 16 | 27178152  | Imputed | A | T | 0.6407 | 0.4962 | 0.1046 | 4.13E-06 | Intron Variant          | LINC02129    |
| <b>acetate</b>           | rs9923988   | 16 | 88840554  | Imputed | G | C | 0.3846 | 0.5101 | 0.1076 | 4.15E-06 | Intron Variant          | PIEZO1       |
| <b>leucine</b>           | rs1424315   | 13 | 70434557  | Imputed | C | T | 0.1053 | 0.6972 | 0.1475 | 4.17E-06 | Intron Variant          | KLHL1        |
| <b>3-hydroxybutyrate</b> | rs2213037   | 4  | 100160177 | Imputed | C | T | 0.9717 | 1.5024 | 0.3151 | 4.19E-06 | Intron Variant          | LOC100507053 |
| <b>glucose</b>           | rs73159714  | 12 | 101676071 | Imputed | T | C | 0.0162 | 1.7637 | 0.3733 | 4.21E-06 | Intron Variant          | UTP20        |
| <b>lactate</b>           | rs77762405  | 4  | 102560900 | Imputed | G | C | 0.8927 | 0.7241 | 0.1533 | 4.23E-06 | Intergenic              |              |
| <b>valine</b>            | rs79424822  | 15 | 83626379  | Imputed | C | T | 0.0142 | 1.5508 | 0.3285 | 4.25E-06 | Intron Variant          | HOMER2       |
| <b>acetone</b>           | rs2441735   | 10 | 68240373  | Imputed | A | T | 0.502  | 0.4253 | 0.0901 | 4.33E-06 | Intron Variant          | CTNNA3       |
| <b>valine</b>            | rs9842287   | 3  | 122756143 | Imputed | T | C | 0.2328 | 0.5404 | 0.1146 | 4.33E-06 | Intergenic              |              |
| <b>valine</b>            | rs72974161  | 2  | 136802456 | Imputed | C | T | 0.9069 | 0.7803 | 0.1654 | 4.34E-06 | Intergenic              |              |
| <b>glycerol</b>          | rs147694655 | 8  | 58611915  | Imputed | G | C | 0.9787 | 1.9179 | 0.4055 | 4.40E-06 | Intergenic              |              |
| <b>pyruvate</b>          | rs4805449   | 19 | 30116004  | Imputed | G | A | 0.7824 | 0.5323 | 0.1127 | 4.40E-06 | Intergenic              |              |
| <b>leucine</b>           | rs2441739   | 10 | 68249299  | Imputed | G | A | 0.5111 | 0.4151 | 0.0881 | 4.41E-06 | Intron Variant          | CTNNA3       |
| <b>formate</b>           | rs79696701  | 1  | 75363713  | Imputed | C | G | 0.9494 | 0.9354 | 0.1988 | 4.49E-06 | Intergenic              |              |
| <b>acetoacetate</b>      | rs42845     | 2  | 59109090  | Imputed | C | G | 0.8107 | 0.608  | 0.1287 | 4.53E-06 | Intron Variant          | LINC01122    |
| <b>3-hydroxybutyrate</b> | rs321534    | 3  | 25200846  | Imputed | G | T | 0.8209 | 0.6111 | 0.1286 | 4.53E-06 | Intron Variant          | RARB         |
| <b>acetate</b>           | rs4729162   | 7  | 94516931  | Imputed | G | C | 0.1761 | 0.6316 | 0.1339 | 4.60E-06 | Intergenic              |              |
| <b>formate</b>           | rs4637211   | 21 | 26824158  | Imputed | A | G | 0.081  | 0.8161 | 0.1737 | 4.63E-06 | Intergenic              |              |

|                    |             |    |           |         |   |   |        |        |        |          |                |                         |
|--------------------|-------------|----|-----------|---------|---|---|--------|--------|--------|----------|----------------|-------------------------|
| acetate            | rs28510752  | 4  | 65306505  | Imputed | C | T | 0.5283 | 0.4274 | 0.0907 | 4.70E-06 | Intergenic     |                         |
| alanine            | rs6991598   | 8  | 52913147  | Imputed | C | A | 0.086  | 0.7537 | 0.1604 | 4.70E-06 | Intergenic     |                         |
| acetone            | rs42845     | 2  | 59109090  | Imputed | C | G | 0.8107 | 0.5718 | 0.1217 | 4.73E-06 | Intron Variant | LINC01122               |
| glycine            | rs138965218 | 11 | 69310534  | Imputed | T | C | 0.0172 | 1.5412 | 0.3281 | 4.75E-06 | Intergenic     |                         |
| x3_hydroxybutyrate | rs12137897  | 1  | 108304301 | Imputed | A | G | 0.1184 | 0.7855 | 0.1658 | 4.76E-06 | Intron Variant | VAV3                    |
| creatine           | rs881078    | 10 | 130258262 | Imputed | T | C | 0.4919 | 0.468  | 0.0997 | 4.83E-06 | Intergenic     |                         |
| myo_inositol       | rs59868802  | 18 | 36691083  | Imputed | A | T | 0.9119 | 0.8191 | 0.1733 | 4.85E-06 | Intergenic     |                         |
| formate            | rs9484280   | 6  | 139826062 | Imputed | A | G | 0.5587 | 0.426  | 0.0909 | 4.87E-06 | Intergenic     |                         |
| alanine            | rs150880306 | 8  | 93835392  | Imputed | G | T | 0.0142 | 1.8775 | 0.4002 | 4.88E-06 | Intergenic     |                         |
| glycine            | rs9557956   | 13 | 103579895 | Imputed | G | A | 0.7632 | 0.5407 | 0.1153 | 4.92E-06 | Intergenic     |                         |
| glycine            | rs6920957   | 6  | 151043035 | Imputed | G | A | 0.6923 | 0.4581 | 0.0977 | 4.94E-06 | Intron Variant | PLEKHG1                 |
| acetone            | rs76485411  | 3  | 170298562 | Imputed | G | A | 0.9879 | 2.3387 | 0.4987 | 4.95E-06 | Intron Variant | SLC7A14-AS1,<br>SLC7A14 |
| acetate            | rs11526042  | 12 | 123932679 | Imputed | A | C | 0.2692 | 0.4871 | 0.1038 | 5.06E-06 | Intergenic     |                         |
| formate            | rs78963087  | 10 | 21989006  | Imputed | A | G | 0.2409 | 0.5344 | 0.1143 | 5.08E-06 | Intron Variant | MLLT10                  |
| glucose            | rs57422819  | 16 | 77792432  | Imputed | G | A | 0.5739 | 0.4472 | 0.0955 | 5.08E-06 | Intron Variant | LOC107984878            |
| 3-hydroxybutyrate  | rs2672721   | 5  | 451683    | Imputed | C | T | 0.5506 | 0.5035 | 0.1066 | 5.10E-06 | Intron Variant | EXOC3                   |
| 3-hydroxybutyrate  | rs72688117  | 4  | 127265692 | Imputed | G | A | 0.2146 | 0.5924 | 0.1254 | 5.10E-06 | Intergenic     |                         |
| 3-hydroxybutyrate  | rs80349349  | 16 | 8565498   | Imputed | G | T | 0.9676 | 1.6627 | 0.3521 | 5.10E-06 | Intergenic     |                         |
| acetate            | rs2402901   | 7  | 128273555 | Imputed | C | T | 0.9808 | 1.5773 | 0.3363 | 5.15E-06 | Intron Variant | LOC101928451            |
| creatine           | rs35686527  | 6  | 167659709 | Imputed | T | G | 0.167  | 0.6323 | 0.1352 | 5.18E-06 | Intron Variant | LOC102725048            |
| creatinine         | rs28675967  | 22 | 43899258  | Imputed | G | A | 0.0476 | 1.1261 | 0.2407 | 5.23E-06 | Intron Variant | MPPED1                  |
| acetone            | rs72722987  | 5  | 3472585   | Imputed | G | C | 0.9342 | 0.9825 | 0.2101 | 5.25E-06 | Intron Variant | LINC01019               |
| glucose            | rs76902478  | 11 | 87370685  | Imputed | G | A | 0.9474 | 0.9172 | 0.1963 | 5.28E-06 | Intron Variant | LOC107984361            |

|               |             |    |           |           |   |   |        |        |        |          |                                  |              |
|---------------|-------------|----|-----------|-----------|---|---|--------|--------|--------|----------|----------------------------------|--------------|
| leucine       | rs2213906   | 8  | 17377057  | Imputed   | G | C | 0.6215 | 0.4775 | 0.1023 | 5.37E-06 | Intron Variant                   | SLC7A2       |
| glucose       | rs9960190   | 18 | 75116363  | Imputed   | G | A | 0.1012 | 0.6676 | 0.143  | 5.41E-06 | Intron Variant                   | LOC107985171 |
| tyrosine      | rs16949076  | 15 | 94935064  | Imputed   | A | G | 0.1113 | 0.6802 | 0.1457 | 5.41E-06 | Intron Variant                   | MCTP2        |
| pyruvate      | rs35526582  | 10 | 123575926 | Imputed   | C | T | 0.9636 | 1.2458 | 0.2666 | 5.49E-06 | Intron Variant                   | ATE1         |
| lactate       | rs1483292   | 4  | 65322597  | Imputed   | G | T | 0.5547 | 0.4268 | 0.0916 | 5.66E-06 | Intergenic                       |              |
| methanol      | rs17085104  | 4  | 65436020  | Imputed   | T | C | 0.3877 | 0.4353 | 0.0935 | 5.67E-06 | Intergenic                       |              |
| myo-inositol  | rs62287490  | 3  | 175996407 | Imputed   | A | G | 0.1306 | 0.7722 | 0.1647 | 5.68E-06 | Intergenic                       |              |
| tyrosine      | rs1842955   | 4  | 65309678  | Genotyped | C | T | 0.4443 | 0.4178 | 0.0898 | 5.79E-06 | Intergenic                       |              |
| formate       | rs4899836   | 14 | 84101142  | Imputed   | A | G | 0.0213 | 1.4191 | 0.3054 | 5.81E-06 | Intergenic                       |              |
| tyrosine      | rs1178320   | 7  | 18238845  | Imputed   | A | C | 0.3168 | 0.4793 | 0.1031 | 5.88E-06 | Intron Variant                   | HDAC9        |
| acetate       | rs35621847  | 17 | 66924083  | Imputed   | A | G | 0.0597 | 1.001  | 0.2148 | 5.89E-06 | Missense Variant                 | ABCA8        |
| alanine       | rs249932    | 16 | 23619669  | Imputed   | T | C | 0.0587 | 0.9042 | 0.1945 | 5.90E-06 | Intron Variant                   | PALB2        |
| tyrosine      | rs80134072  | 7  | 100344428 | Genotyped | G | A | 0.9727 | 1.2186 | 0.2622 | 5.90E-06 | Intron Variant                   | ZAN          |
| acetoacetate  | rs11908225  | 20 | 52754251  | Imputed   | A | G | 0.9808 | 1.3032 | 0.2795 | 5.91E-06 | Intergenic                       |              |
| methanol      | rs117194206 | 7  | 30376381  | Imputed   | G | A | 0.9899 | 2.3301 | 0.5016 | 5.94E-06 | Intron Variant                   | ZNRF2        |
| phenylalanine | rs77762405  | 4  | 102560900 | Imputed   | G | C | 0.8927 | 0.7163 | 0.1542 | 5.95E-06 | Intergenic                       |              |
| methanol      | rs45587437  | 22 | 24096464  | Imputed   | T | C | 0.1154 | 0.6604 | 0.1422 | 5.96E-06 | Intron Variant                   | VPREB3       |
| alanine       | rs35044959  | 3  | 127476878 | Imputed   | C | G | 0.0324 | 1.1404 | 0.2456 | 6.01E-06 | Intron Variant                   | MGLL         |
| creatine      | rs974680    | 21 | 27011112  | Imputed   | A | G | 0.1498 | 0.5895 | 0.1269 | 6.02E-06 | Intron Variant                   | JAM2         |
| acetoacetate  | rs2111657   | 18 | 28147571  | Imputed   | A | G | 0.7389 | 0.5732 | 0.1231 | 6.05E-06 | Intergenic                       |              |
| phenylalanine | rs144330986 | 3  | 11032954  | Imputed   | A | G | 0.0101 | 1.8695 | 0.4029 | 6.14E-06 | 2KB Upstream Variant             | SLC6A1       |
| lactate       | rs12196202  | 6  | 139826787 | Imputed   | C | T | 0.6437 | 0.4533 | 0.0977 | 6.18E-06 | Intergenic                       |              |
| myo-inositol  | rs2021171   | 16 | 72110541  | Imputed   | A | G | 0.0294 | 1.4502 | 0.3107 | 6.23E-06 | Missense Variant, Intron Variant | HPR, TXNL4B  |
| myo-inositol  | rs1257176   | 2  | 134945197 | Imputed   | G | T | 0.6164 | 0.5712 | 0.1226 | 6.44E-06 | Intron Variant                   | MGAT5        |
| pyruvate      | rs62201701  | 20 | 46359257  | Imputed   | C | T | 0.9818 | 1.5109 | 0.3259 | 6.47E-06 | Intron Variant                   | SULF2        |
| glycine       | rs28510752  | 4  | 65306505  | Imputed   | C | T | 0.5283 | 0.4048 | 0.0875 | 6.52E-06 | Intergenic                       |              |

|                   |             |    |           |           |   |   |        |        |        |          |                                         |                           |
|-------------------|-------------|----|-----------|-----------|---|---|--------|--------|--------|----------|-----------------------------------------|---------------------------|
| leucine           | rs151068546 | 18 | 13863862  | Imputed   | C | T | 0.9747 | 1.4137 | 0.3057 | 6.52E-06 | Intergenic                              |                           |
| pyruvate          | rs974680    | 21 | 27011112  | Imputed   | A | G | 0.1498 | 0.6398 | 0.1381 | 6.53E-06 | Intron Variant                          | JAM2                      |
| leucine           | rs11547728  | 22 | 50720622  | Imputed   | C | T | 0.5061 | 0.4208 | 0.091  | 6.56E-06 | Missense Variant                        | PLXNB2                    |
| creatine          | rs116391452 | 4  | 177358617 | Imputed   | G | A | 0.914  | 0.8093 | 0.1751 | 6.59E-06 | Intergenic                              |                           |
| myo-inositol      | rs17374919  | 22 | 27792672  | Imputed   | T | C | 0.9271 | 1.0764 | 0.2313 | 6.59E-06 | Intergenic                              |                           |
| pyruvate          | rs55704362  | 6  | 4040348   | Imputed   | C | G | 0.0536 | 0.9894 | 0.2136 | 6.59E-06 | Intron Variant                          | PRPF4B                    |
| acetate           | rs11179207  | 12 | 72840057  | Imputed   | G | A | 0.0749 | 1.0469 | 0.2259 | 6.60E-06 | Intron Variant                          | TRHDE                     |
| phenylalanine     | rs2007982   | 2  | 240510964 | Imputed   | C | A | 0.3593 | 0.4589 | 0.0993 | 6.62E-06 | Intergenic                              |                           |
| 3-hydroxybutyrate | rs117318343 | 16 | 57987459  | Genotyped | G | A | 0.9565 | 1.1966 | 0.2567 | 6.63E-06 | Intron Variant                          | CNGB1                     |
| leucine           | rs75464738  | 14 | 23029263  | Imputed   | T | C | 0.914  | 0.8862 | 0.1918 | 6.64E-06 | 500B Downstream Variant                 | LOC105370399              |
| creatine          | rs76177206  | 8  | 125220894 | Imputed   | C | T | 0.9879 | 1.873  | 0.4054 | 6.66E-06 | Intron Variant                          | LOC101927588              |
| creatinine        | rs12137496  | 1  | 39579804  | Imputed   | G | C | 0.3188 | 0.4861 | 0.1052 | 6.71E-06 | Intron Variant                          | MACF1                     |
| acetate           | rs2459147   | 19 | 51766176  | Imputed   | G | A | 0.5233 | 0.4338 | 0.0937 | 6.74E-06 | Intron Variant                          | SIGLECL1,<br>LOC107985327 |
| acetoacetate      | rs117574829 | 8  | 81322383  | Genotyped | C | T | 0.9818 | 1.8588 | 0.4012 | 6.74E-06 | Intergenic                              |                           |
| glucose           | rs75661686  | 2  | 209539017 | Imputed   | A | G | 0.0172 | 1.5438 | 0.3343 | 6.74E-06 | Intron Variant                          | LOC101927960              |
| myo-inositol      | rs6975104   | 7  | 151515746 | Imputed   | C | G | 0.3411 | 0.4999 | 0.1075 | 6.75E-06 | Intron Variant                          | PRKAG2                    |
| citrate           | rs11762128  | 7  | 152855440 | Imputed   | C | T | 0.9211 | 0.7875 | 0.17   | 6.81E-06 | Intergenic                              |                           |
| phenylalanine     | rs13230956  | 7  | 122669959 | Imputed   | G | A | 0.6751 | 0.4482 | 0.0972 | 6.90E-06 | Intergenic                              |                           |
| creatine          | rs10132436  | 14 | 104012194 | Imputed   | A | C | 0.7409 | 0.4886 | 0.106  | 6.97E-06 | Intergenic                              |                           |
| methanol          | rs72679950  | 1  | 111109257 | Imputed   | A | G | 0.2217 | 0.4964 | 0.1077 | 6.98E-06 | Intergenic                              |                           |
| citrate           | rs116546166 | 3  | 139007820 | Imputed   | A | C | 0.0364 | 1.2904 | 0.279  | 7.01E-06 | Intergenic                              |                           |
| leucine           | rs80134072  | 7  | 100344428 | Genotyped | G | A | 0.9727 | 1.2081 | 0.2622 | 7.04E-06 | Intron Variant                          | ZAN                       |
| phenylalanine     | rs41291728  | 3  | 50310922  | Imputed   | G | A | 0.9595 | 0.9993 | 0.2169 | 7.04E-06 | Intron Variant, 500B Downstream Variant | SEMA3B, MIR6872           |
| glycerol          | rs11762128  | 7  | 152855440 | Imputed   | C | T | 0.9211 | 0.7796 | 0.1688 | 7.12E-06 | Intergenic                              |                           |

|                          |             |    |           |           |   |   |        |        |        |          |                      |                    |
|--------------------------|-------------|----|-----------|-----------|---|---|--------|--------|--------|----------|----------------------|--------------------|
| <b>methanol</b>          | rs3902799   | 16 | 77813618  | Imputed   | C | T | 0.501  | 0.4483 | 0.0974 | 7.16E-06 | Intron Variant       | LOC107984878       |
| <b>glycerol</b>          | rs79579331  | 10 | 22580283  | Genotyped | A | C | 0.9524 | 1.0625 | 0.2301 | 7.17E-06 | Intergenic           |                    |
| <b>acetoacetate</b>      | rs146273627 | 1  | 216239981 | Imputed   | C | T | 0.9686 | 1.1622 | 0.2518 | 7.24E-06 | Intron Variant       | USH2A              |
| <b>phenylalanine</b>     | rs143146888 | 10 | 57546882  | Imputed   | A | T | 0.0587 | 0.8941 | 0.1944 | 7.31E-06 | Intergenic           |                    |
| <b>lactate</b>           | rs2811170   | 1  | 98007575  | Imputed   | T | A | 0.8785 | 0.7015 | 0.1525 | 7.35E-06 | Intron Variant       | DPYD               |
| <b>glycerol</b>          | rs72662371  | 1  | 54355804  | Imputed   | A | C | 0.0233 | 1.4467 | 0.3137 | 7.37E-06 | 2KB Upstream Variant | YIPF1              |
| <b>formate</b>           | rs148204667 | 7  | 127594928 | Imputed   | A | G | 0.0243 | 1.3028 | 0.2837 | 7.39E-06 | Intron Variant       | SND1, LOC105375492 |
| <b>creatine</b>          | rs62254082  | 3  | 69417585  | Imputed   | C | T | 0.3856 | 0.4392 | 0.0956 | 7.42E-06 | Intron Variant       | FRMD4B             |
| <b>methanol</b>          | rs2386499   | 2  | 235477886 | Imputed   | C | T | 0.8826 | 0.6778 | 0.1475 | 7.42E-06 | Intergenic           |                    |
| <b>phenylalanine</b>     | rs117734263 | 15 | 42831221  | Imputed   | C | A | 0.0132 | 1.864  | 0.4055 | 7.42E-06 | Intron Variant       | LRRCS7             |
| <b>myo-inositol</b>      | rs72773649  | 10 | 12835227  | Genotyped | T | G | 0.0385 | 1.6197 | 0.3503 | 7.52E-06 | Intron Variant       | CAMK1D             |
| <b>acetoacetate</b>      | rs56327019  | 12 | 129458974 | Genotyped | A | G | 0.6974 | 0.4695 | 0.102  | 7.62E-06 | Intron Variant       | GLT1D1             |
| <b>lactate</b>           | rs13230956  | 7  | 122669959 | Imputed   | G | A | 0.6751 | 0.4418 | 0.0963 | 7.63E-06 | Intergenic           |                    |
| <b>phenylalanine</b>     | rs974680    | 21 | 27011112  | Imputed   | A | G | 0.1498 | 0.5959 | 0.1299 | 7.74E-06 | Intron Variant       | JAM2               |
| <b>creatinine</b>        | rs62273573  | 3  | 125610065 | Imputed   | G | A | 0.9393 | 0.9762 | 0.2128 | 7.80E-06 | Intergenic           |                    |
| <b>citrate</b>           | rs42845     | 2  | 59109090  | Imputed   | C | G | 0.8107 | 0.6078 | 0.1321 | 7.81E-06 | Intron Variant       | LINC01122          |
| <b>glucose</b>           | rs72919600  | 18 | 45894749  | Imputed   | C | T | 0.1164 | 0.6331 | 0.1381 | 7.82E-06 | Intron Variant       | ZBTB7C             |
| <b>3-hydroxybutyrate</b> | rs267920    | 5  | 10669532  | Imputed   | C | T | 0.2085 | 0.6222 | 0.1346 | 7.86E-06 | Intergenic           |                    |
| <b>3-hydroxybutyrate</b> | rs62215596  | 20 | 52689292  | Imputed   | C | T | 0.9474 | 0.9852 | 0.2132 | 7.86E-06 | Intergenic           |                    |
| <b>acetoacetate</b>      | rs61849365  | 10 | 50867565  | Imputed   | A | G | 0.2611 | 0.5065 | 0.1102 | 7.92E-06 | Intron Variant       | CHAT               |
| <b>myo-inositol</b>      | rs12963496  | 18 | 46255750  | Genotyped | A | G | 0.2166 | 0.5762 | 0.1249 | 7.92E-06 | Intron Variant       | CTIF               |
| <b>citrate</b>           | rs139125334 | 12 | 56055794  | Imputed   | C | T | 0.1123 | 0.7611 | 0.1656 | 7.96E-06 | Intergenic           |                    |
| <b>myo-inositol</b>      | rs430932    | 22 | 18902852  | Imputed   | C | T | 0.0941 | 0.7651 | 0.166  | 7.96E-06 | Intron Variant       | PRODH              |

|                          |             |    |           |           |   |   |        |        |        |          |                |                       |
|--------------------------|-------------|----|-----------|-----------|---|---|--------|--------|--------|----------|----------------|-----------------------|
| <b>3-hydroxybutyrate</b> | rs148948230 | 16 | 54239642  | Imputed   | C | T | 0.9808 | 1.7721 | 0.3839 | 8.04E-06 | Intergenic     |                       |
| <b>acetoacetate</b>      | rs61778763  | 1  | 36484246  | Imputed   | A | C | 0.9271 | 0.8856 | 0.1929 | 8.06E-06 | Intron Variant | AGO3,<br>LOC105378647 |
| <b>myo-inositol</b>      | rs189343    | 16 | 26619479  | Imputed   | T | G | 0.4099 | 0.5065 | 0.11   | 8.13E-06 | Intergenic     |                       |
| <b>creatinine</b>        | rs4461451   | 3  | 185763219 | Genotyped | A | G | 0.1285 | 0.6327 | 0.1383 | 8.14E-06 | Intergenic     |                       |
| <b>acetoacetate</b>      | rs10023768  | 4  | 11474624  | Imputed   | C | T | 0.9211 | 0.8603 | 0.1875 | 8.18E-06 | Intron Variant | LOC107986178          |
| <b>lactate</b>           | rs4527615   | 5  | 28652860  | Genotyped | A | C | 0.4241 | 0.4431 | 0.0969 | 8.18E-06 | Intergenic     |                       |
| <b>pyruvate</b>          | rs28730582  | 4  | 100005318 | Imputed   | C | T | 0.9747 | 1.5049 | 0.3285 | 8.20E-06 | Intron Variant | ADH5                  |
| <b>citrate</b>           | rs13206669  | 6  | 77946672  | Imputed   | G | A | 0.1974 | 0.6015 | 0.1311 | 8.22E-06 | Intron Variant | LOC101928570          |
| <b>pyruvate</b>          | rs2911458   | 16 | 88845009  | Imputed   | T | C | 0.3877 | 0.4877 | 0.1065 | 8.22E-06 | Intron Variant | PIEZO1                |
| <b>pyruvate</b>          | rs13059128  | 3  | 141171190 | Imputed   | G | A | 0.6953 | 0.4915 | 0.1073 | 8.28E-06 | Intergenic     |                       |
| <b>alanine</b>           | rs4282492   | 7  | 147217895 | Imputed   | T | A | 0.7986 | 0.5356 | 0.1172 | 8.30E-06 | Intron Variant | CNTNAP2               |
| <b>creatinine</b>        | rs6991598   | 8  | 52913147  | Imputed   | C | A | 0.086  | 0.7401 | 0.1619 | 8.38E-06 | Intergenic     |                       |
| <b>glycine</b>           | rs77569096  | 8  | 128468955 | Imputed   | G | A | 0.1933 | 0.5394 | 0.1181 | 8.38E-06 | Intron Variant | CASC8                 |
| <b>tyrosine</b>          | rs2539982   | 2  | 63111004  | Imputed   | G | A | 0.4767 | 0.4262 | 0.0933 | 8.39E-06 | Intron Variant | EHP1                  |
| <b>glycine</b>           | rs71348715  | 2  | 136535410 | Imputed   | T | G | 0.7642 | 0.5088 | 0.1114 | 8.41E-06 | Intron Variant | UBXN4                 |
| <b>methanol</b>          | rs9294454   | 6  | 90678652  | Imputed   | C | T | 0.8421 | 0.5663 | 0.1241 | 8.47E-06 | Intron Variant | BACH2                 |
| <b>leucine</b>           | rs72974161  | 2  | 136802456 | Imputed   | C | T | 0.9069 | 0.749  | 0.1641 | 8.49E-06 | Intergenic     |                       |
| <b>methanol</b>          | rs141365824 | 15 | 47233723  | Imputed   | A | G | 0.0182 | 1.3786 | 0.3021 | 8.50E-06 | Intergenic     |                       |
| <b>acetone</b>           | rs12466549  | 2  | 192615315 | Imputed   | G | A | 0.5962 | 0.4529 | 0.0992 | 8.53E-06 | Intergenic     |                       |
| <b>tyrosine</b>          | rs77762405  | 4  | 102560900 | Imputed   | G | C | 0.8927 | 0.7011 | 0.154  | 8.90E-06 | Intergenic     |                       |
| <b>lactate</b>           | rs9557956   | 13 | 103579895 | Imputed   | G | A | 0.7632 | 0.5286 | 0.1161 | 8.95E-06 | Intergenic     |                       |
| <b>valine</b>            | rs9557956   | 13 | 103579895 | Imputed   | G | A | 0.7632 | 0.5271 | 0.1159 | 9.05E-06 | Intergenic     |                       |
| <b>acetoacetate</b>      | rs112588189 | 20 | 34494383  | Imputed   | A | G | 0.9757 | 1.2214 | 0.2676 | 9.06E-06 | Intron Variant | PHF20                 |
| <b>pyruvate</b>          | rs17085104  | 4  | 65436020  | Imputed   | T | C | 0.3877 | 0.4445 | 0.0975 | 9.06E-06 | Intergenic     |                       |
| <b>tyrosine</b>          | rs2008168   | 7  | 147216870 | Imputed   | T | C | 0.7783 | 0.5413 | 0.119  | 9.08E-06 | Intron Variant | CNTNAP2               |

|                      |             |    |           |           |   |   |        |        |        |          |                                               |                      |
|----------------------|-------------|----|-----------|-----------|---|---|--------|--------|--------|----------|-----------------------------------------------|----------------------|
| <b>acetoacetate</b>  | rs147128865 | 9  | 34972766  | Imputed   | T | C | 0.0142 | 2.0157 | 0.4417 | 9.10E-06 | Intron Variant                                | PHF24                |
| <b>tyrosine</b>      | rs17190458  | 20 | 12602813  | Imputed   | A | T | 0.0456 | 0.9895 | 0.2176 | 9.12E-06 | Intergenic                                    |                      |
| <b>citrate</b>       | rs76341461  | 13 | 101521416 | Genotyped | G | A | 0.9423 | 0.9064 | 0.1987 | 9.25E-06 | Intron Variant                                | NALCN-AS1            |
| <b>lactate</b>       | rs4517336   | 1  | 239492387 | Imputed   | C | A | 0.2713 | 0.4765 | 0.1049 | 9.38E-06 | Intergenic                                    |                      |
| <b>phenylalanine</b> | rs28730582  | 4  | 100005318 | Imputed   | C | T | 0.9747 | 1.436  | 0.3161 | 9.38E-06 | Intron Variant                                | ADH5                 |
| <b>phenylalanine</b> | rs138621393 | 3  | 51420328  | Imputed   | T | C | 0.9626 | 1.0875 | 0.2395 | 9.43E-06 | 3 Prime UTR Variant                           | DOCK3                |
| <b>acetone</b>       | rs258829    | 5  | 11386127  | Genotyped | C | T | 0.0982 | 0.8108 | 0.1786 | 9.52E-06 | Intron Variant                                | CTNND2               |
| <b>methanol</b>      | rs4078223   | 7  | 65359     | Imputed   | T | C | 0.9595 | 1.0973 | 0.2419 | 9.52E-06 | Intergenic                                    |                      |
| <b>glycerol</b>      | rs4521561   | 6  | 164762249 | Imputed   | A | G | 0.6883 | 0.4782 | 0.1051 | 9.53E-06 | Intergenic                                    |                      |
| <b>glucose</b>       | rs1811248   | 7  | 28421036  | Imputed   | G | T | 0.3553 | 0.4404 | 0.0971 | 9.59E-06 | Intron Variant                                | CREB5                |
| <b>tyrosine</b>      | rs150959290 | 1  | 111619569 | Imputed   | G | A | 0.9585 | 0.9936 | 0.2191 | 9.60E-06 | Intergenic                                    |                      |
| <b>myo-inositol</b>  | rs72779777  | 2  | 6982227   | Genotyped | T | C | 0.0202 | 1.6734 | 0.3665 | 9.63E-06 | Intron Variant, 2KB Upstream Variant          | CMPK2, NRIR          |
| <b>glycerol</b>      | rs12464454  | 2  | 15231280  | Imputed   | A | G | 0.2763 | 0.5039 | 0.1108 | 9.65E-06 | Intron Variant                                | NBAS                 |
| <b>acetate</b>       | rs186358932 | 14 | 74456480  | Imputed   | G | A | 0.9727 | 1.3231 | 0.2912 | 9.74E-06 | Intron Variant                                | ENTPD5               |
| <b>creatine</b>      | rs56274812  | 1  | 165239473 | Imputed   | G | T | 0.3543 | 0.4526 | 0.0999 | 9.79E-06 | Intron Variant                                | LMX1A                |
| <b>creatine</b>      | rs10830080  | 10 | 129263045 | Imputed   | C | T | 0.4737 | 0.4202 | 0.0927 | 9.83E-06 | Intergenic                                    |                      |
| <b>acetone</b>       | rs41540212  | 21 | 37442727  | Imputed   | T | C | 0.0192 | 1.8354 | 0.405  | 9.88E-06 | Intron Variant, Non Coding Transcript Variant | CBR1, LOC100133286   |
| <b>pyruvate</b>      | rs117397249 | 7  | 35687894  | Imputed   | A | G | 0.0283 | 1.2164 | 0.2681 | 9.88E-06 | Intron Variant                                | HERPUD2              |
| <b>alanine</b>       | rs12194562  | 6  | 146520360 | Genotyped | T | C | 0.9828 | 1.825  | 0.403  | 9.91E-06 | Intron Variant                                | GRM1                 |
| <b>citrate</b>       | rs2015402   | 1  | 203183825 | Imputed   | G | A | 0.8745 | 0.7619 | 0.1677 | 9.92E-06 | Intergenic                                    |                      |
| <b>glucose</b>       | rs188922919 | 13 | 113070751 | Imputed   | C | A | 0.9818 | 1.5071 | 0.3329 | 9.98E-06 | Intron Variant                                | SPACA7, LOC105370372 |
| <b>glycerol</b>      | rs2441739   | 10 | 68249299  | Imputed   | G | A | 0.5111 | 0.4199 | 0.0925 | 9.98E-06 | Intron Variant                                | CTNNA3               |
| <b>acetate</b>       | rs13132463  | 4  | 40249406  | Imputed   | T | A | 0.9737 | 1.5974 | 0.352  | 9.99E-06 | Intergenic                                    |                      |



**Supplementary Table S6.** Look-up of genome-wide significant variants in a previously published GWAS of the entire ADRENAL cohort. Sepsis outcomes (28- and 90-day mortality, APACHE, and log creatinine) GWAS were performed in ADRENAL-GEPS cohort. Susceptibility to septic shock GWAS was a case-control analyses that included the ADRENAL-GEPS cohort and a cohort of controls. A1 is the effect allele. N is the sample size, number of participants included in GWAS.

| Metabolite        | Phenotype                                    | CHR | SNP       | BP        | A1 | N    | BETA    | STAT    | SE     | CI            | P       | OR     |
|-------------------|----------------------------------------------|-----|-----------|-----------|----|------|---------|---------|--------|---------------|---------|--------|
| 3-hydroxybutyrate | 28-day mortality                             | 10  | rs2456680 | 68255097  | G  | 493  | -0.2297 | -1.284  | 0.1789 | [-0.58, 0.12] | 0.1992  | 0.7948 |
| 3-hydroxybutyrate | 90-day mortality                             | 10  | rs2456680 | 68255097  | G  | 493  | 0.6673  | 1.932   | 0.3454 | [-0.01, 1.34] | 0.08014 | 1.949  |
| 3-hydroxybutyrate | APACHE                                       | 10  | rs2456680 | 68255097  | G  | 492  | 0.1567  | 0.3478  | 0.4505 | [-0.73, 1.04] | 0.7282  |        |
| 3-hydroxybutyrate | Dialysis                                     | 10  | rs2456680 | 68255097  | G  | 493  | -0.4986 | -0.8794 | 0.5669 | [-1.61, 0.61] | 0.3792  | 0.6074 |
| 3-hydroxybutyrate | Renal replacement therapy post randomisation | 10  | rs2456680 | 68255097  | G  | 491  | -0.0156 | -0.1063 | 0.1470 | [-0.30, 0.27] | 0.9153  | 0.9845 |
| acetoacetate      | 28-day mortality                             | 4   | rs2213037 | 100160177 | T  | 493  | -0.1896 | -0.359  | 0.5281 | [-1.22, 0.85] | 0.7196  | 0.8273 |
| acetoacetate      | 90-day mortality                             | 4   | rs2213037 | 100160177 | T  | 493  | -0.4589 | -0.8751 | 0.5244 | [-1.49, 0.57] | 0.3815  | 0.632  |
| acetoacetate      | APACHE                                       | 4   | rs2213037 | 100160177 | T  | 492  | 1.6640  | 1.241   | 1.3409 | [-0.96, 4.29] | 0.2151  |        |
| acetoacetate      | Renal replacement therapy post randomisation | 4   | rs2213037 | 100160177 | T  | 491  | 0.6931  | 1.488   | 0.4658 | [-0.22, 1.61] | 0.09145 | 2      |
| acetoacetate      | Susceptibility to septic shock               | 4   | rs2213037 | 100160177 | T  | 8432 | 0.0129  | 0.06491 | 0.1990 | [-0.38, 0.40] | 0.9482  | 1.013  |
| creatinine        | 28-day mortality                             | 4   | rs6851961 | 65351771  | G  | 493  | 0.0227  | 0.1292  | 0.1760 | [-0.32, 0.37] | 0.8972  | 1.023  |
| creatinine        | 90-day mortality                             | 4   | rs6851961 | 65351771  | G  | 493  | 0.0862  | 0.5342  | 0.1613 | [-0.23, 0.40] | 0.5932  | 1.09   |
| creatinine        | APACHE                                       | 4   | rs6851961 | 65351771  | G  | 492  | 0.2993  | 0.6643  | 0.4505 | [-0.58, 1.18] | 0.5068  |        |
| creatinine        | Dialysis                                     | 4   | rs6851961 | 65351771  | G  | 493  | 0.4253  | 0.7888  | 0.5391 | [-0.63, 1.48] | 0.4302  | 1.53   |
| creatinine        | Renal replacement therapy post randomisation | 4   | rs6851961 | 65351771  | G  | 491  | -0.0845 | -0.5691 | 0.5391 | [-0.38, 0.21] | 0.5693  | 0.919  |
| creatinine        | log creatinine                               | 4   | rs6851961 | 65351771  | G  | 492  | 0.0199  | 0.4812  | 0.0413 | [-0.06, 0.10] | 0.6306  |        |
| creatinine        | Susceptibility to septic shock               | 4   | rs6851961 | 65351771  | G  | 8510 | -0.0323 | -0.4845 | 0.0667 | [-0.16, 0.10] | 0.628   | 0.9682 |

\* lead SNP for 3-hydroxybutyrate was not present in QIMR controls.

**Supplementary Table S7.** Look-up of genome-wide significant variants in a previously published GWAS for metabolites which reported significant hits in the current study (3-hydroxybutyrate, acetoacetate, creatinine). For full reference refer to Supplementary Table S7. NR means value was not reported in the GWAS catalogue.

| Metabolite        | SNP         | Replication Study        | EA<br>GWA<br>S Cat. | p-value<br>GWAS<br>Cat. | Beta GWAS Cat.           | CI GWAS Cat.  | mapped Gene<br>GWAS Cat. | EA | Beta    | SE     | p-value |
|-------------------|-------------|--------------------------|---------------------|-------------------------|--------------------------|---------------|--------------------------|----|---------|--------|---------|
| 3-hydroxybutyrate | rs9896573   | Demirkan et al. (2015)   | NR                  | 1.65 x 10 <sup>-8</sup> | NR                       | NR            | KCNJ2-AS1, KCNJ16        | C  | -0.2195 | 0.1614 | 0.1758  |
| 3-hydroxybutyrate | rs769449    | Li-Gao et al. (2021)     | A                   | 7 x 10 <sup>-9</sup>    | 0.176858 mmol/l increase | [0.12-0.24]   | APOE                     | A  | -0.0125 | 0.1969 | 0.9494  |
| 3-hydroxybutyrate | rs9930957   | Richardson et al. (2022) | C                   | 5 x 10 <sup>-29</sup>   | 0.0624432 unit decrease  | [0.051-0.073] | PMFBP1                   | T  | 0.1059  | 0.1579 | 0.5033  |
| 3-hydroxybutyrate | rs117643180 | Richardson et al. (2022) | C                   | 2 x 10 <sup>-10</sup>   | 0.0823219 unit increase  | [0.057-0.108] | SLC2A4                   | A  | 0.5528  | 0.4652 | 0.2365  |
| 3-hydroxybutyrate | rs429358    | Richardson et al. (2022) | T                   | 2 x 10 <sup>-23</sup>   | 0.0564519 unit decrease  | [0.045-0.068] | APOE                     | C  | 0.0617  | 0.1631 | 0.7056  |
| 3-hydroxybutyrate | rs12976395  | Richardson et al. (2022) | G                   | 2 x 10 <sup>-8</sup>    | 0.0247054 unit increase  | [0.016-0.033] | APOC4, APOC1P1           | NR | NR      | NR     | NR      |
| 3-hydroxybutyrate | rs2642439   | Richardson et al. (2022) | A                   | 2 x 10 <sup>-8</sup>    | 0.0248664 unit increase  | [0.016-0.034] | MTARC1                   | A  | -0.1489 | 0.1260 | 0.2391  |
| 3-hydroxybutyrate | rs10127775  | Richardson et al. (2022) | A                   | 2 x 10 <sup>-13</sup>   | 0.0309459 unit increase  | [0.023-0.039] | GALNT2                   | A  | 0.1297  | 0.1096 | 0.2383  |
| 3-hydroxybutyrate | rs585188    | Richardson et al. (2022) | G                   | 9 x 10 <sup>-21</sup>   | 0.0439476 unit increase  | [0.035-0.053] | PLCXD3, OXCT1            | A  | 0.0200  | 0.1238 | 0.8719  |
| 3-hydroxybutyrate | rs9987289   | Richardson et al. (2022) | A                   | 1 x 10 <sup>-19</sup>   | 0.0648127 unit decrease  | [0.051-0.079] | RNU6-526P, RNU6-1151P    | A  | 0.1280  | 0.2058 | 0.5349  |
| 3-hydroxybutyrate | rs7831557   | Richardson et al. (2022) | G                   | 2 x 10 <sup>-11</sup>   | 0.0274428 unit decrease  | [0.019-0.035] | MSRA                     | G  | 0.1429  | 0.1093 | 0.1931  |
| 3-hydroxybutyrate | rs2645430   | Richardson et al. (2022) | A                   | 7 x 10 <sup>-14</sup>   | 0.0312104 unit increase  | [0.023-0.039] | FDFT1                    | A  | -0.1440 | 0.1105 | 0.1946  |
| 3-hydroxybutyrate | rs7873387   | Richardson et al. (2022) | A                   | 5 x 10 <sup>-8</sup>    | 0.0342812 unit decrease  | [0.022-0.047] | ABCA1                    | C  | -0.1689 | 0.1750 | 0.3360  |
| 3-hydroxybutyrate | rs2575876   | Richardson et al. (2022) | G                   | 1 x 10 <sup>-11</sup>   | 0.0319159 unit increase  | [0.023-0.041] | ABCA1                    | A  | -0.0501 | 0.1181 | 0.6721  |
| 3-hydroxybutyrate | rs2419604   | Richardson et al. (2022) | A                   | 3 x 10 <sup>-19</sup>   | 0.0410568 unit decrease  | [0.032-0.05]  | GPAM                     | A  | 0.0962  | 0.1282 | 0.4542  |

|                   |             |                          |   |                       |                         |               |                            |    |         |        |        |
|-------------------|-------------|--------------------------|---|-----------------------|-------------------------|---------------|----------------------------|----|---------|--------|--------|
| 3-hydroxybutyrate | rs4520      | Richardson et al. (2022) | T | 8 x 10 <sup>-16</sup> | 0.0387186 unit increase | [0.029-0.048] | APOC3                      | T  | 0.0491  | 0.1246 | 0.6942 |
| 3-hydroxybutyrate | rs7953249   | Richardson et al. (2022) | G | 4 x 10 <sup>-9</sup>  | 0.0244662 unit decrease | [0.016-0.033] | HNF1A-AS1                  | G  | -0.0319 | 0.1172 | 0.7857 |
| 3-hydroxybutyrate | rs12314700  | Richardson et al. (2022) | A | 1 x 10 <sup>-10</sup> | 0.0339249 unit increase | [0.024-0.044] | BCL7A                      | T  | -0.2539 | 0.1404 | 0.0725 |
| 3-hydroxybutyrate | rs145730801 | Richardson et al. (2022) | T | 2 x 10 <sup>-10</sup> | 0.0643177 unit increase | [0.044-0.084] | SERPINA10,<br>SERPINA6     | NR | NR      | NR     | NR     |
| 3-hydroxybutyrate | rs28929474  | Richardson et al. (2022) | C | 1 x 10 <sup>-27</sup> | 0.159726 unit increase  | [0.13-0.19]   | SERPINA1                   | T  | -0.3460 | 0.3512 | 0.3260 |
| 3-hydroxybutyrate | rs35853021  | Richardson et al. (2022) | G | 2 x 10 <sup>-12</sup> | 0.0302559 unit increase | [0.022-0.039] | ALDH1A2                    | T  | -0.1476 | 0.1255 | 0.2415 |
| 3-hydroxybutyrate | rs588136    | Richardson et al. (2022) | C | 4 x 10 <sup>-11</sup> | 0.0331961 unit decrease | [0.023-0.043] | ALDH1A2, LIPC,<br>LIPC-AS1 | C  | -0.1586 | 0.1393 | 0.2567 |
| 3-hydroxybutyrate | rs4520      | Smith et al. (2022)      | T | 8 x 10 <sup>-13</sup> | 0.0290618 unit increase | [0.021-0.037] | APOC3                      | T  | 0.0491  | 0.1246 | 0.6942 |
| 3-hydroxybutyrate | rs73228032  | Smith et al. (2022)      | C | 2 x 10 <sup>-11</sup> | 0.0332297 unit increase | [0.024-0.043] | HIP1R                      | A  | -0.3005 | 0.1746 | 0.0872 |
| 3-hydroxybutyrate | rs7149605   | Smith et al. (2022)      | G | 2 x 10 <sup>-8</sup>  | 0.0336823 unit increase | [0.022-0.045] | SERPINA1                   | A  | -0.0712 | 0.1724 | 0.6802 |
| 3-hydroxybutyrate | rs926144    | Smith et al. (2022)      | A | 3 x 10 <sup>-8</sup>  | 0.0232323 unit increase | [0.015-0.031] | -                          | G  | -0.1640 | 0.1418 | 0.2492 |
| 3-hydroxybutyrate | rs35853021  | Smith et al. (2022)      | G | 1 x 10 <sup>-10</sup> | 0.0231899 unit increase | [0.016-0.03]  | -                          | T  | -0.1476 | 0.1255 | 0.2415 |
| 3-hydroxybutyrate | rs588136    | Smith et al. (2022)      | C | 5 x 10 <sup>-9</sup>  | 0.0247645 unit decrease | [0.033-0.016] | ALDH1A2, LIPC,<br>LIPC-AS1 | C  | -0.1586 | 0.1393 | 0.2567 |
| 3-hydroxybutyrate | rs35909200  | Smith et al. (2022)      | T | 5 x 10 <sup>-19</sup> | 0.0421709 unit decrease | [0.051-0.033] | PMFBP1                     | G  | 0.1193  | 0.1580 | 0.4514 |
| 3-hydroxybutyrate | rs429358    | Smith et al. (2022)      | T | 1 x 10 <sup>-19</sup> | 0.0431112 unit decrease | [0.052-0.034] | APOE                       | C  | 0.0617  | 0.1631 | 0.7056 |
| 3-hydroxybutyrate | rs617279    | Smith et al. (2022)      | A | 2 x 10 <sup>-15</sup> | 0.0315533 unit increase | [0.024-0.039] | -                          | T  | 0.0200  | 0.1238 | 0.8719 |
| 3-hydroxybutyrate | rs9987289   | Smith et al. (2022)      | A | 2 x 10 <sup>-18</sup> | 0.0525807 unit decrease | [0.064-0.041] | LOC157273                  | A  | 0.1280  | 0.2058 | 0.5349 |
| 3-hydroxybutyrate | rs2645430   | Smith et al. (2022)      | A | 5 x 10 <sup>-12</sup> | 0.0242544 unit increase | [0.017-0.031] | FDFT1,<br>LOC105379243     | A  | -0.1440 | 0.1105 | 0.1946 |
| 3-hydroxybutyrate | rs7814795   | Smith et al. (2022)      | C | 9 x 10 <sup>-10</sup> | 0.0213567 unit decrease | [0.028-0.015] | -                          | C  | 0.1261  | 0.1115 | 0.2595 |
| 3-hydroxybutyrate | rs13284054  | Smith et al. (2022)      | T | 5 x 10 <sup>-10</sup> | 0.0329786 unit increase | [0.023-0.043] | ABCA1                      | C  | -0.1743 | 0.1601 | 0.2781 |

|              |             |                                 |    |                       |                         |                 |                       |    |         |        |        |
|--------------|-------------|---------------------------------|----|-----------------------|-------------------------|-----------------|-----------------------|----|---------|--------|--------|
| acetoacetate | rs2255400   | Richardson et al. (2022)        | A  | 4 x 10 <sup>-9</sup>  | 0.0270253 unit decrease | [0.018-0.036]   | GPAM                  | A  | 0.0983  | 0.1126 | 0.3838 |
| acetoacetate | rs964184    | Richardson et al. (2022)        | G  | 5 x 10 <sup>-26</sup> | 0.0637363 unit increase | [0.052-0.076]   | ZPR1                  | G  | 0.1887  | 0.1568 | 0.2303 |
| acetoacetate | rs144305620 | Richardson et al. (2022)        | G  | 2 x 10 <sup>-13</sup> | 0.0382775 unit increase | [0.028-0.048]   | MLXIP                 | A  | -0.0964 | 0.1257 | 0.4441 |
| acetoacetate | rs4846915   | Richardson et al. (2022)        | C  | 8 x 10 <sup>-9</sup>  | 0.0333683 unit increase | [0.022-0.045]   | GALNT2                | C  | 0.2012  | 0.1469 | 0.1725 |
| acetoacetate | rs11745373  | Richardson et al. (2022)        | T  | 2 x 10 <sup>-28</sup> | 0.0520298 unit increase | [0.043-0.061]   | OXCT1                 | A  | 0.0112  | 0.1157 | 0.9229 |
| acetoacetate | rs150515955 | Richardson et al. (2022)        | C  | 3 x 10 <sup>-20</sup> | 0.110897 unit increase  | [0.087-0.134]   | SFT2D1, MPC1          | T  | -0.1532 | 0.2597 | 0.5558 |
| acetoacetate | rs199922514 | Richardson et al. (2022)        | A  | 5 x 10 <sup>-11</sup> | 0.0469937 unit decrease | [0.033-0.061]   | RNU6-526P, RNU6-1151P | NR | NR      | NR     | NR     |
| acetoacetate | rs144305620 | Smith et al. (2022)             | G  | 2 x 10 <sup>-08</sup> | 0.0268138 unit increase | [0.018-0.036]   | MLXIP                 | A  | -0.0964 | 0.1257 | 0.4441 |
| acetoacetate | rs617174    | Smith et al. (2022)             | C  | 2 x 10 <sup>-20</sup> | 0.0399854 unit increase | [0.032-0.048]   | -                     | G  | 0.0112  | 0.1157 | 0.9229 |
| acetoacetate | rs2126259   | Smith et al. (2022)             | T  | 4 x 10 <sup>-10</sup> | 0.0387327 unit decrease | [0.051-0.027]   | LOC157273             | T  | -0.0095 | 0.1864 | 0.9592 |
| creatinine   | rs111714445 | Sinnott-Armstrong et al. (2021) | T  | 2 x 10 <sup>-21</sup> | 0.0709 unit decrease    | [0.056-0.086]   | TDRD12                | T  | -1.0178 | 0.2933 | 0.0006 |
| creatinine   | rs715       | Kanai et al. (2018)             | NR | 2 x 10 <sup>-12</sup> | 0.03693 unit increase   | [0.027-0.047]   | CPS1                  | C  | -0.3204 | 0.1040 | 0.0023 |
| creatinine   | rs115777572 | Sinnott-Armstrong et al. (2021) | C  | 2 x 10 <sup>-10</sup> | 0.0408 unit decrease    | [0.028-0.053]   | FAM47E-STBD1, FAM47E  | C  | -0.7280 | 0.2362 | 0.0023 |
| creatinine   | rs2216405   | Sinnott-Armstrong et al. (2021) | G  | 2 x 10 <sup>-38</sup> | 0.0407 unit increase    | [0.035-0.047]   | CPS1                  | G  | -0.4009 | 0.1355 | 0.0034 |
| creatinine   | rs2216405   | Sinnott-Armstrong et al. (2021) | G  | 3 x 10 <sup>-9</sup>  | 0.019 unit increase     | [0.013-0.025]   | CPS1                  | G  | -0.4009 | 0.1355 | 0.0034 |
| creatinine   | rs1705694   | Kanai et al. (2018)             | NR | 9 x 10 <sup>-12</sup> | 0.03389 unit decrease   | [0.024-0.044]   | STC1                  | G  | -0.2424 | 0.0934 | 0.0101 |
| creatinine   | rs1106766   | Pattaro et al. (2016)           | T  | 2 x 10 <sup>-9</sup>  | 0.0061 unit increase    | [0.0041-0.0081] | R3HDM2                | T  | -0.2907 | 0.1196 | 0.0160 |
| creatinine   | rs3741414   | Gorski et al. (2017)            | NR | 2 x 10 <sup>-7</sup>  | NR                      | NR              | INHBC                 | T  | -0.2907 | 0.1196 | 0.0160 |
| creatinine   | rs10794486  | Kanai et al. (2018)             | NR | 3 x 10 <sup>-13</sup> | 0.02708 unit decrease   | [0.02-0.034]    | IGF1R                 | G  | 0.2714  | 0.1129 | 0.0171 |
| creatinine   | rs515639    | Sinnott-Armstrong et al. (2021) | T  | 1 x 10 <sup>-14</sup> | 0.0277 unit decrease    | [0.021-0.035]   | SLC6A13               | T  | -0.3232 | 0.1358 | 0.0182 |

|            |             |                                 |    |                       |                         |                 |                 |   |         |        |        |
|------------|-------------|---------------------------------|----|-----------------------|-------------------------|-----------------|-----------------|---|---------|--------|--------|
| creatinine | rs10087788  | Sinnott-Armstrong et al. (2021) | A  | 5 x 10 <sup>-11</sup> | 0.0182 unit increase    | [0.013-0.024]   | CPNE3           | A | -0.2627 | 0.1115 | 0.0194 |
| creatinine | rs1047891   | Graham et al. (2019)            | A  | 3 x 10 <sup>-14</sup> | 0.051092 unit increase  | [0.039-0.063]   | CPS1            | A | -0.2476 | 0.1055 | 0.0199 |
| creatinine | rs1047891   | Gorski et al. (2017)            | A  | 2 x 10 <sup>-16</sup> | 0.0089 unit decrease    | [0.0069-0.0109] | CPS1            | A | -0.2476 | 0.1055 | 0.0199 |
| creatinine | rs10786068  | Sinnott-Armstrong et al. (2021) | G  | 5 x 10 <sup>-9</sup>  | 0.0151 unit increase    | [0.01-0.02]     | NIP7P1, CYP26A1 | G | -0.2359 | 0.1068 | 0.0284 |
| creatinine | rs1111571   | Gorski et al. (2017)            | A  | 6 x 10 <sup>-9</sup>  | 0.0061 unit increase    | [0.0039-0.0083] | PRMT7           | A | 0.2493  | 0.1135 | 0.0292 |
| creatinine | rs227702    | Sinnott-Armstrong et al. (2021) | G  | 2 x 10 <sup>-9</sup>  | 0.016 unit increase     | [0.011-0.021]   | C17orf67        | G | -0.2483 | 0.1132 | 0.0294 |
| creatinine | rs35958131  | Sinnott-Armstrong et al. (2021) | A  | 1 x 10 <sup>-13</sup> | 0.0326 unit decrease    | [0.024-0.041]   | RERG            | A | 0.3823  | 0.1764 | 0.0314 |
| creatinine | rs12599531  | Sinnott-Armstrong et al. (2021) | C  | 1 x 10 <sup>-13</sup> | 0.0184 unit decrease    | [0.014-0.023]   | SPIRE2          | C | 0.2183  | 0.1007 | 0.0314 |
| creatinine | rs8056893   | Pattaro et al. (2016)           | A  | 1 x 10 <sup>-7</sup>  | 0.0047 unit increase    | [0.0029-0.0065] | SLC7A6          | A | 0.2470  | 0.1157 | 0.0339 |
| creatinine | rs117820381 | Sinnott-Armstrong et al. (2021) | A  | 4 x 10 <sup>-10</sup> | 0.0497 unit decrease    | [0.034-0.065]   | TNRC6B, ADSL    | A | 0.7679  | 0.3625 | 0.0353 |
| creatinine | rs228611    | Pattaro et al. (2016)           | A  | 4 x 10 <sup>-12</sup> | 0.0056 unit decrease    | [0.004-0.0072]  | MANBA           | A | 0.1984  | 0.0942 | 0.0364 |
| creatinine | rs6927469   | Rhee et al. (2013)              | NR | 3 x 10 <sup>-6</sup>  | 0.1935785 unit decrease | [0.11-0.27]     | F13A1           | G | -0.2421 | 0.1160 | 0.0381 |
| creatinine | rs10856780  | Sinnott-Armstrong et al. (2021) | C  | 2 x 10 <sup>-15</sup> | 0.0194 unit decrease    | [0.015-0.024]   | RDH14           | C | 0.2117  | 0.1029 | 0.0410 |
| creatinine | rs7223401   | Sinnott-Armstrong et al. (2021) | G  | 2 x 10 <sup>-26</sup> | 0.0341 unit decrease    | [0.028-0.04]    | BCAS3           | G | -0.2568 | 0.1265 | 0.0436 |
| creatinine | rs12975033  | Pattaro et al. (2016)           | A  | 1 x 10 <sup>-6</sup>  | 0.0039 unit decrease    | [0.0023-0.0055] | IZUMO1          | A | 0.2024  | 0.1006 | 0.0456 |
| creatinine | rs17037804  | Sinnott-Armstrong et al. (2021) | G  | 1 x 10 <sup>-12</sup> | 0.0196 unit decrease    | [0.014-0.025]   | EXOG            | G | -0.2317 | 0.1160 | 0.0470 |
| creatinine | rs73048979  | Sinnott-Armstrong et al. (2021) | T  | 3 x 10 <sup>-20</sup> | 0.0681 unit increase    | [0.054-0.083]   | TSPAN9          | T | 0.4917  | 0.2475 | 0.0483 |
| creatinine | rs111366116 | Gorski et al. (2017)            | T  | 6 x 10 <sup>-10</sup> | 0.0094 unit increase    | [0.0065-0.0123] | ARL~+15.00      | T | -0.3084 | 0.1592 | 0.0541 |
| creatinine | rs7735249   | Pattaro et al. (2016)           | C  | 2 x 10 <sup>-7</sup>  | 0.0079 unit decrease    | [0.005-0.0108]  | ARL~+15.00      | G | -0.3084 | 0.1592 | 0.0541 |
| creatinine | rs4848700   | Sinnott-Armstrong et al. (2021) | C  | 4 x 10 <sup>-10</sup> | 0.0172 unit decrease    | [0.012-0.022]   | TFCP2L1         | C | -0.2089 | 0.1083 | 0.0550 |

|            |            |                                 |    |                       |                          |                 |                |   |         |        |        |
|------------|------------|---------------------------------|----|-----------------------|--------------------------|-----------------|----------------|---|---------|--------|--------|
| creatinine | rs2802729  | Pattaro et al. (2016)           | A  | 2 x 10 <sup>-8</sup>  | 0.0046 unit decrease     | [0.003-0.0062]  | SDCCAG8        | A | -0.1944 | 0.1010 | 0.0556 |
| creatinine | rs73670554 | Sinnott-Armstrong et al. (2021) | T  | 1 x 10 <sup>-10</sup> | 0.0277 unit decrease     | [0.019-0.036]   | UNCX           | T | -0.4016 | 0.2088 | 0.0558 |
| creatinine | rs62436674 | Sinnott-Armstrong et al. (2021) | T  | 1 x 10 <sup>-21</sup> | 0.03 unit decrease       | [0.024-0.036]   | UNCX           | T | -0.3025 | 0.1590 | 0.0586 |
| creatinine | rs16972495 | Kanai et al. (2018)             | NR | 2 x 10 <sup>-8</sup>  | 0.02353 unit decrease    | [0.015-0.032]   | CEMIP          | C | 0.2534  | 0.1350 | 0.0620 |
| creatinine | rs16972495 | Sinnott-Armstrong et al. (2021) | C  | 5 x 10 <sup>-10</sup> | 0.0192 unit decrease     | [0.013-0.025]   | CEMIP          | C | 0.2534  | 0.1350 | 0.0620 |
| creatinine | rs2297372  | Sinnott-Armstrong et al. (2021) | C  | 1 x 10 <sup>-9</sup>  | 0.016 unit increase      | [0.011-0.021]   | IGF2R          | C | -0.2011 | 0.1076 | 0.0630 |
| creatinine | rs6801044  | Williams et al. (2015)          | NR | 4 x 10 <sup>-6</sup>  | NR                       | NR              | RN7SL73P, APOD | A | 0.2159  | 0.1165 | 0.0653 |
| creatinine | rs7703225  | Sinnott-Armstrong et al. (2021) | A  | 2 x 10 <sup>-14</sup> | 0.0266 unit increase     | [0.02-0.033]    | FGFR4, NSD1    | A | 0.2770  | 0.1498 | 0.0660 |
| creatinine | rs35104165 | Sinnott-Armstrong et al. (2021) | C  | 1 x 10 <sup>-13</sup> | 0.0453 unit increase     | [0.033-0.057]   | GSDMB          | C | 0.3942  | 0.2134 | 0.0661 |
| creatinine | rs6935129  | Kanai et al. (2018)             | NR | 1 x 10 <sup>-8</sup>  | 0.0216 unit decrease     | [0.014-0.029]   | RPS10-NUDT3    | A | 0.5027  | 0.2741 | 0.0680 |
| creatinine | rs4744712  | Pattaro et al. (2016)           | A  | 7 x 10 <sup>-15</sup> | 0.0072 unit decrease     | [0.0054-0.009]  | PIP5K1B        | A | 0.1751  | 0.0957 | 0.0688 |
| creatinine | rs4744712  | Pattaro et al. (2016)           | A  | 4 x 10 <sup>-15</sup> | 0.0071 unit decrease     | [0.0053-0.0089] | PIP5K1B        | A | 0.1751  | 0.0957 | 0.0688 |
| creatinine | rs4744712  | Köttgen et al. (2010)           | A  | 8 x 10 <sup>-14</sup> | 0.01 unit decrease       | [0.008-0.016]   | PIP5K1B        | A | 0.1751  | 0.0957 | 0.0688 |
| creatinine | rs12654812 | Sinnott-Armstrong et al. (2021) | A  | 7 x 10 <sup>-40</sup> | 0.0331 unit increase     | [0.028-0.038]   | RGS14          | A | 0.1691  | 0.0933 | 0.0715 |
| creatinine | rs11956816 | Sinnott-Armstrong et al. (2021) | T  | 6 x 10 <sup>-10</sup> | 0.0343 unit increase     | [0.024-0.045]   | DAB2           | T | -0.4012 | 0.2227 | 0.0731 |
| creatinine | rs35654350 | Sinnott-Armstrong et al. (2021) | C  | 6 x 10 <sup>-11</sup> | 0.0209 unit increase     | [0.015-0.027]   | TDRD12         | C | 0.2308  | 0.1289 | 0.0750 |
| creatinine | rs7535253  | Sinnott-Armstrong et al. (2021) | C  | 9 x 10 <sup>-11</sup> | 0.019 unit increase      | [0.013-0.025]   | PTPN14, CENPF  | T | 0.2122  | 0.1192 | 0.0765 |
| creatinine | rs6041422  | Rhee et al. (2013)              | NR | 8 x 10 <sup>-6</sup>  | 0.23383853 unit decrease | [0.13-0.34]     | '-             | G | -0.2509 | 0.1419 | 0.0785 |
| creatinine | rs2125739  | Sinnott-Armstrong et al. (2021) | C  | 4 x 10 <sup>-9</sup>  | 0.016 unit increase      | [0.011-0.021]   | ABCC10         | C | -0.2042 | 0.1155 | 0.0786 |
| creatinine | rs7956634  | Pattaro et al. (2016)           | T  | 7 x 10 <sup>-12</sup> | 0.0068 unit decrease     | [0.0048-0.0088] | RERG           | C | 0.2010  | 0.1144 | 0.0805 |

|            |             |                                 |    |                       |                           |                 |                   |   |         |        |        |
|------------|-------------|---------------------------------|----|-----------------------|---------------------------|-----------------|-------------------|---|---------|--------|--------|
| creatinine | rs12124078  | Pattaro et al. (2016)           | A  | 5 x 10 <sup>-9</sup>  | 0.0058 unit increase      | [0.0038-0.0078] | DNAJC16           | G | 0.1814  | 0.1034 | 0.0810 |
| creatinine | rs1800615   | Pattaro et al. (2016)           | T  | 2 x 10 <sup>-9</sup>  | 0.0058 unit decrease      | [0.004-0.0076]  | CASP9             | T | 0.1814  | 0.1034 | 0.0810 |
| creatinine | rs7515244   | Sinnott-Armstrong et al. (2021) | G  | 3 x 10 <sup>-16</sup> | 0.0209 unit increase      | [0.016-0.026]   | DNAJC16           | G | 0.1814  | 0.1034 | 0.0810 |
| creatinine | rs7546668   | Gorski et al. (2017)            | C  | 1 x 10 <sup>-9</sup>  | 0.0063 unit decrease      | [0.0043-0.0083] | DNAJC16           | C | 0.1814  | 0.1034 | 0.0810 |
| creatinine | rs10746942  | Gorski et al. (2017)            | A  | 4 x 10 <sup>-18</sup> | 0.0086 unit increase      | [0.0068-0.0104] | PIP5K1B           | G | 0.1716  | 0.0990 | 0.0844 |
| creatinine | rs12826808  | Gorski et al. (2017)            | NR | 1 x 10 <sup>-7</sup>  | NR                        | NR              | RERG              | T | 0.1981  | 0.1144 | 0.0848 |
| creatinine | rs79639185  | Sinnott-Armstrong et al. (2021) | A  | 5 x 10 <sup>-10</sup> | 0.0431 unit increase      | [0.03-0.057]    | '-                | A | -0.5024 | 0.2902 | 0.0849 |
| creatinine | rs3812036   | Nagy et al. (2017)              | T  | 1 x 10 <sup>-10</sup> | 0.09276888 mg/dl increase | [0.065-0.121]   | SLC34A1           | T | 0.1805  | 0.1049 | 0.0866 |
| creatinine | rs3812036   | Gorski et al. (2017)            | T  | 9 x 10 <sup>-19</sup> | 0.0102 unit decrease      | [0.008-0.0124]  | SLC34A1           | T | 0.1805  | 0.1049 | 0.0866 |
| creatinine | rs3812036   | Kanai et al. (2018)             | NR | 7 x 10 <sup>-17</sup> | 0.03549 unit increase     | [0.027-0.044]   | SLC34A1           | T | 0.1805  | 0.1049 | 0.0866 |
| creatinine | rs11812460  | Sinnott-Armstrong et al. (2021) | A  | 4 x 10 <sup>-11</sup> | 0.018 unit increase       | [0.013-0.023]   | CYP26A1, CYP26C1  | A | -0.1808 | 0.1072 | 0.0933 |
| creatinine | rs132653    | Sinnott-Armstrong et al. (2021) | T  | 1 x 10 <sup>-9</sup>  | 0.0188 unit decrease      | [0.013-0.025]   | APOL3             | G | 0.2098  | 0.1249 | 0.0945 |
| creatinine | rs11123169  | Kanai et al. (2018)             | NR | 5 x 10 <sup>-14</sup> | 0.03103 unit decrease     | [0.023-0.039]   | PSD4, PAX8-AS1    | C | 0.1693  | 0.1014 | 0.0965 |
| creatinine | rs56142049  | Sinnott-Armstrong et al. (2021) | G  | 5 x 10 <sup>-9</sup>  | 0.025 unit decrease       | [0.017-0.033]   | TNP1, FABP5P14    | G | -0.3143 | 0.1905 | 0.1005 |
| creatinine | rs1016988   | Sinnott-Armstrong et al. (2021) | C  | 2 x 10 <sup>-11</sup> | 0.0202 unit decrease      | [0.014-0.026]   | SLC22A5, IRF1-AS1 | C | 0.1899  | 0.1168 | 0.1056 |
| creatinine | rs4667594   | Pattaro et al. (2016)           | A  | 4 x 10 <sup>-8</sup>  | 0.0044 unit decrease      | [0.0028-0.006]  | LRP2              | T | -0.1569 | 0.0971 | 0.1076 |
| creatinine | rs6431731   | Pattaro et al. (2016)           | T  | 5 x 10 <sup>-7</sup>  | 0.0124 unit decrease      | [0.0075-0.0173] | LINC01804         | C | -0.3368 | 0.2085 | 0.1077 |
| creatinine | rs72704117  | Sinnott-Armstrong et al. (2021) | T  | 1 x 10 <sup>-11</sup> | 0.0542 unit increase      | [0.039-0.07]    | THBS3-AS1, THBS3  | T | -0.4704 | 0.2914 | 0.1080 |
| creatinine | rs116014524 | Sinnott-Armstrong et al. (2021) | T  | 4 x 10 <sup>-10</sup> | 0.0319 unit increase      | [0.022-0.042]   | NFATC1            | T | 0.3477  | 0.2156 | 0.1083 |
| creatinine | rs10857147  | Kanai et al. (2018)             | NR | 2 x 10 <sup>-16</sup> | 0.03533 unit decrease     | [0.027-0.044]   | PRDM8, FGF5       | T | -0.1685 | 0.1048 | 0.1095 |

|            |             |                                 |    |                       |                          |                 |                   |   |         |        |        |
|------------|-------------|---------------------------------|----|-----------------------|--------------------------|-----------------|-------------------|---|---------|--------|--------|
| creatinine | rs164748    | Pattaro et al. (2016)           | C  | 2 x 10 <sup>-8</sup>  | 0.0046 unit increase     | [NR]            | CHMP1A            | G | -0.1617 | 0.1011 | 0.1111 |
| creatinine | rs34175245  | Sinnott-Armstrong et al. (2021) | G  | 4 x 10 <sup>-12</sup> | 0.0297 unit decrease     | [0.021-0.038]   | ARID1A, RNU7-29P  | G | -0.2802 | 0.1756 | 0.1121 |
| creatinine | rs76275337  | Sinnott-Armstrong et al. (2021) | A  | 2 x 10 <sup>-26</sup> | 0.038 unit increase      | [0.031-0.045]   | DUOX1             | A | -0.2195 | 0.1383 | 0.1139 |
| creatinine | rs12160926  | Sinnott-Armstrong et al. (2021) | A  | 3 x 10 <sup>-9</sup>  | 0.0255 unit decrease     | [0.017-0.034]   | SHISA8            | A | 0.2739  | 0.1725 | 0.1140 |
| creatinine | rs9887921   | Sinnott-Armstrong et al. (2021) | T  | 6 x 10 <sup>-12</sup> | 0.0314 unit decrease     | [0.022-0.04]    | TCEA3, ZNF436-AS1 | T | 0.3098  | 0.1954 | 0.1143 |
| creatinine | rs11655024  | Kanai et al. (2018)             | NR | 5 x 10 <sup>-9</sup>  | 0.03128 unit decrease    | [0.021-0.042]   | BCAS3             | T | -0.1866 | 0.1184 | 0.1166 |
| creatinine | rs6127099   | Gorski et al. (2017)            | A  | 3 x 10 <sup>-17</sup> | 0.0095 unit decrease     | [0.0073-0.0117] | CYP24A1, BCAS1    | T | 0.1659  | 0.1060 | 0.1191 |
| creatinine | rs6122466   | Sinnott-Armstrong et al. (2021) | G  | 7 x 10 <sup>-14</sup> | 0.0255 unit increase     | [0.019-0.032]   | EEF1A2, PDPF      | G | 0.2361  | 0.1538 | 0.1263 |
| creatinine | rs12190287  | Sinnott-Armstrong et al. (2021) | G  | 2 x 10 <sup>-13</sup> | 0.0182 unit increase     | [0.013-0.023]   | TCF21             | G | 0.1521  | 0.1001 | 0.1301 |
| creatinine | rs60865276  | Sinnott-Armstrong et al. (2021) | T  | 2 x 10 <sup>-13</sup> | 0.0184 unit decrease     | [0.014-0.023]   | GNAS              | T | 0.1488  | 0.0986 | 0.1327 |
| creatinine | rs72778130  | Sinnott-Armstrong et al. (2021) | A  | 1 x 10 <sup>-11</sup> | 0.0203 unit increase     | [0.014-0.026]   | CLUAP1            | A | 0.1884  | 0.1252 | 0.1338 |
| creatinine | rs11706153  | Sinnott-Armstrong et al. (2021) | T  | 2 x 10 <sup>-9</sup>  | 0.0488 unit decrease     | [0.033-0.065]   | CELSR3            | T | 0.6246  | 0.4187 | 0.1373 |
| creatinine | rs12207489  | Rhee et al. (2013)              | NR | 9 x 10 <sup>-6</sup>  | 0.15618896 unit decrease | [0.087-0.225]   | USP45             | A | -0.1539 | 0.1056 | 0.1463 |
| creatinine | rs67332916  | Kanai et al. (2018)             | NR | 1 x 10 <sup>-11</sup> | 0.02647 unit decrease    | [0.019-0.034]   | DGKH              | T | 0.2179  | 0.1495 | 0.1464 |
| creatinine | rs7212715   | Kanai et al. (2018)             | NR | 9 x 10 <sup>-13</sup> | 0.03478 unit increase    | [0.025-0.044]   | CDK12, MED1       | C | -0.1647 | 0.1132 | 0.1474 |
| creatinine | rs187355703 | Sinnott-Armstrong et al. (2021) | G  | 2 x 10 <sup>-31</sup> | 0.0938 unit increase     | [0.078-0.109]   | HOXD-AS2          | G | -0.3905 | 0.2731 | 0.1542 |
| creatinine | rs187355703 | Gorski et al. (2017)            | C  | 5 x 10 <sup>-10</sup> | 0.0182 unit increase     | [0.012-0.024]   | HOXD-AS2          | G | -0.3905 | 0.2731 | 0.1542 |
| creatinine | rs863678    | Graham et al. (2019)            | T  | 1 x 10 <sup>-8</sup>  | 0.036512 unit increase   | [0.025-0.048]   | HOXD10, HOXD11    | G | 0.1508  | 0.1060 | 0.1564 |
| creatinine | rs4774940   | Sinnott-Armstrong et al. (2021) | C  | 1 x 10 <sup>-10</sup> | 0.0164 unit decrease     | [0.011-0.021]   | CGNL1             | C | -0.1452 | 0.1026 | 0.1586 |
| creatinine | rs2472297   | Sinnott-Armstrong et al. (2021) | T  | 5 x 10 <sup>-34</sup> | 0.0332 unit decrease     | [0.028-0.038]   | CYP1A2, CYP1A1    | T | 0.1616  | 0.1144 | 0.1594 |



|            |            |                                 |    |                       |                         |                 |                  |   |         |        |        |
|------------|------------|---------------------------------|----|-----------------------|-------------------------|-----------------|------------------|---|---------|--------|--------|
| creatinine | rs2472297  | Sinnott-Armstrong et al. (2021) | T  | 4 x 10 <sup>-26</sup> | 0.0293 unit decrease    | [0.024-0.035]   | CYP1A2, CYP1A1   | T | 0.1616  | 0.1144 | 0.1594 |
| creatinine | rs17742573 | Sinnott-Armstrong et al. (2021) | G  | 2 x 10 <sup>-10</sup> | 0.0289 unit increase    | [0.02-0.038]    | ACVR2A           | G | -0.3230 | 0.2291 | 0.1600 |
| creatinine | rs74576293 | Sinnott-Armstrong et al. (2021) | C  | 1 x 10 <sup>-14</sup> | 0.0323 unit increase    | [0.024-0.041]   | TSPAN9           | C | 0.2162  | 0.1536 | 0.1607 |
| creatinine | rs2994979  | Rhee et al. (2013)              | NR | 2 x 10 <sup>-6</sup>  | 0.1585385 unit decrease | [0.093-0.224]   | FH, RPS6KA1      | C | -0.1424 | 0.1014 | 0.1616 |
| creatinine | rs10206899 | Chambers et al. (2010)          | G  | 1 x 10 <sup>-9</sup>  | 1 % decrease            | [0.7-1.2]       | ALMS1P1          | C | -0.1631 | 0.1162 | 0.1617 |
| creatinine | rs13538    | Köttgen et al. (2010)           | G  | 5 x 10 <sup>-14</sup> | 0.01 unit increase      | [0.005-0.013]   | NAT8, ALMS1P1    | G | -0.1631 | 0.1162 | 0.1617 |
| creatinine | rs13538    | Pattaro et al. (2016)           | A  | 3 x 10 <sup>-16</sup> | 0.0092 unit decrease    | [0.007-0.0114]  | NAT8, ALMS1P1    | G | -0.1631 | 0.1162 | 0.1617 |
| creatinine | rs6546838  | Pattaro et al. (2016)           | A  | 8 x 10 <sup>-20</sup> | 0.0093 unit decrease    | [0.0073-0.0113] | ALMS1            | G | -0.1633 | 0.1163 | 0.1617 |
| creatinine | rs6060278  | Sinnott-Armstrong et al. (2021) | C  | 2 x 10 <sup>-14</sup> | 0.0222 unit increase    | [0.017-0.028]   | PROCR, EDEM2     | C | 0.1607  | 0.1146 | 0.1622 |
| creatinine | rs11722932 | Sinnott-Armstrong et al. (2021) | C  | 5 x 10 <sup>-9</sup>  | 0.0176 unit decrease    | [0.012-0.023]   | SHISA3           | C | 0.1751  | 0.1249 | 0.1623 |
| creatinine | rs34783010 | Sinnott-Armstrong et al. (2021) | T  | 7 x 10 <sup>-10</sup> | 0.0186 unit increase    | [0.013-0.024]   | GIPR             | T | -0.1744 | 0.1245 | 0.1627 |
| creatinine | rs6492982  | Gorski et al. (2017)            | NR | 2 x 10 <sup>-6</sup>  | NR                      | NR              | INO80            | C | -0.1376 | 0.0991 | 0.1665 |
| creatinine | rs12483377 | Sinnott-Armstrong et al. (2021) | A  | 3 x 10 <sup>-9</sup>  | 0.0251 unit increase    | [0.017-0.033]   | SLC19A1, COL18A1 | A | 0.2124  | 0.1539 | 0.1691 |
| creatinine | rs700236   | Gorski et al. (2017)            | A  | 2 x 10 <sup>-18</sup> | 0.0084 unit increase    | [0.0066-0.0102] | C9               | G | -0.1401 | 0.1017 | 0.1700 |
| creatinine | rs11637353 | Sinnott-Armstrong et al. (2021) | T  | 7 x 10 <sup>-13</sup> | 0.0188 unit increase    | [0.014-0.024]   | ODF3L1, CSPG4    | T | -0.1422 | 0.1043 | 0.1741 |
| creatinine | rs9309473  | Sinnott-Armstrong et al. (2021) | G  | 4 x 10 <sup>-70</sup> | 0.0499 unit decrease    | [0.044-0.055]   | ALMS1            | G | -0.1519 | 0.1132 | 0.1809 |
| creatinine | rs8123293  | Sinnott-Armstrong et al. (2021) | G  | 1 x 10 <sup>-9</sup>  | 0.0226 unit increase    | [0.015-0.03]    | BCAS1, CYP24A1   | G | -0.2172 | 0.1627 | 0.1833 |
| creatinine | rs78070307 | Sinnott-Armstrong et al. (2021) | C  | 4 x 10 <sup>-13</sup> | 0.0306 unit increase    | [0.022-0.039]   | Y_RNA, PLEKHH2   | C | -0.2423 | 0.1821 | 0.1847 |
| creatinine | rs16942751 | Kanai et al. (2018)             | NR | 3 x 10 <sup>-9</sup>  | 0.02425 unit increase   | [0.016-0.032]   | AQP4-AS1         | A | -0.2121 | 0.1604 | 0.1875 |
| creatinine | rs34095326 | Sinnott-Armstrong et al. (2021) | A  | 3 x 10 <sup>-10</sup> | 0.0253 unit decrease    | [0.017-0.033]   | TOMM40           | A | 0.2157  | 0.1634 | 0.1884 |

|            |             |                                 |    |                       |                       |                 |          |   |         |        |        |
|------------|-------------|---------------------------------|----|-----------------------|-----------------------|-----------------|----------|---|---------|--------|--------|
| creatinine | rs1423237   | Sinnott-Armstrong et al. (2021) | G  | 2 x 10 <sup>-13</sup> | 0.0319 unit increase  | [0.023-0.04]    | '-       | G | 0.2356  | 0.1806 | 0.1934 |
| creatinine | rs11158984  | Sinnott-Armstrong et al. (2021) | T  | 4 x 10 <sup>-9</sup>  | 0.0163 unit increase  | [0.011-0.022]   | DPF3     | T | 0.1380  | 0.1064 | 0.1962 |
| creatinine | rs72825201  | Sinnott-Armstrong et al. (2021) | C  | 5 x 10 <sup>-26</sup> | 0.051 unit increase   | [0.042-0.06]    | CDK12    | C | 0.2487  | 0.1921 | 0.1968 |
| creatinine | rs4757489   | Sinnott-Armstrong et al. (2021) | G  | 9 x 10 <sup>-10</sup> | 0.0154 unit increase  | [0.011-0.02]    | PLEKHA7  | T | 0.1365  | 0.1056 | 0.1973 |
| creatinine | rs507666    | Sinnott-Armstrong et al. (2021) | A  | 6 x 10 <sup>-13</sup> | 0.0224 unit decrease  | [0.016-0.028]   | ABO      | A | 0.1846  | 0.1428 | 0.1977 |
| creatinine | rs302972    | Williams et al. (2015)          | NR | 3 x 10 <sup>-6</sup>  | NR                    | NR              | CMAHP    | C | -0.3579 | 0.2769 | 0.1977 |
| creatinine | rs1371614   | Sinnott-Armstrong et al. (2021) | T  | 4 x 10 <sup>-10</sup> | 0.0173 unit increase  | [0.012-0.023]   | DPYSL5   | T | 0.1393  | 0.1078 | 0.1978 |
| creatinine | rs819196    | Graham et al. (2019)            | A  | 4 x 10 <sup>-11</sup> | 0.04046 unit decrease | [0.03-0.051]    | STC1     | T | 0.1222  | 0.0951 | 0.2005 |
| creatinine | rs3798164   | Sinnott-Armstrong et al. (2021) | A  | 1 x 10 <sup>-19</sup> | 0.0221 unit increase  | [0.017-0.027]   | SLC22A1  | A | -0.1298 | 0.1016 | 0.2027 |
| creatinine | rs35657869  | Sinnott-Armstrong et al. (2021) | T  | 7 x 10 <sup>-12</sup> | 0.0352 unit increase  | [0.025-0.045]   | ANKRD11  | T | 0.2658  | 0.2085 | 0.2037 |
| creatinine | rs3820716   | Pattaro et al. (2016)           | A  | 1 x 10 <sup>-6</sup>  | 0.0039 unit decrease  | [0.0023-0.0055] | ACVR2A   | G | -0.1238 | 0.0973 | 0.2045 |
| creatinine | rs113966765 | Sinnott-Armstrong et al. (2021) | A  | 2 x 10 <sup>-11</sup> | 0.0425 unit increase  | [0.03-0.055]    | TPCN2    | A | 0.2899  | 0.2284 | 0.2058 |
| creatinine | rs2230602   | Sinnott-Armstrong et al. (2021) | A  | 3 x 10 <sup>-9</sup>  | 0.0259 unit increase  | [0.017-0.035]   | PTPN12   | A | 0.2799  | 0.2216 | 0.2081 |
| creatinine | rs72834650  | Sinnott-Armstrong et al. (2021) | A  | 3 x 10 <sup>-12</sup> | 0.0584 unit increase  | [0.042-0.075]   | BCAS3    | A | 0.4359  | 0.3471 | 0.2106 |
| creatinine | rs34400381  | Sinnott-Armstrong et al. (2021) | A  | 2 x 10 <sup>-26</sup> | 0.0701 unit decrease  | [0.057-0.083]   | SLC25A45 | A | 0.3189  | 0.2548 | 0.2122 |
| creatinine | rs34400381  | Graham et al. (2019)            | A  | 3 x 10 <sup>-8</sup>  | 0.0903 unit decrease  | [0.061-0.12]    | SLC25A45 | A | 0.3189  | 0.2548 | 0.2122 |
| creatinine | rs2928148   | Pattaro et al. (2016)           | A  | 3 x 10 <sup>-8</sup>  | 0.005 unit increase   | [0.0032-0.0068] | INO80    | G | 0.1205  | 0.0968 | 0.2146 |
| creatinine | rs2104480   | Sinnott-Armstrong et al. (2021) | G  | 6 x 10 <sup>-18</sup> | 0.0238 unit decrease  | [0.018-0.029]   | MED4     | C | -0.1343 | 0.1080 | 0.2149 |
| creatinine | rs6058093   | Gorski et al. (2017)            | A  | 2 x 10 <sup>-13</sup> | 0.0074 unit decrease  | [0.0054-0.0094] | PIGU     | C | 0.1173  | 0.0944 | 0.2155 |
| creatinine | rs3758086   | Pattaro et al. (2016)           | A  | 2 x 10 <sup>-15</sup> | 0.0071 unit decrease  | [0.0053-0.0089] | STC1     | A | 0.1204  | 0.0971 | 0.2164 |

|            |            |                                 |   |                       |                       |                 |                       |   |         |        |        |
|------------|------------|---------------------------------|---|-----------------------|-----------------------|-----------------|-----------------------|---|---------|--------|--------|
| creatinine | rs12930346 | Sinnott-Armstrong et al. (2021) | T | 3 x 10 <sup>-12</sup> | 0.0176 unit increase  | [0.013-0.022]   | DPEP1                 | T | -0.1251 | 0.1011 | 0.2173 |
| creatinine | rs11666497 | Pattaro et al. (2016)           | T | 4 x 10 <sup>-8</sup>  | 0.0058 unit decrease  | [0.0036-0.008]  | SIPA1L3               | T | -0.1717 | 0.1395 | 0.2197 |
| creatinine | rs16882647 | Sinnott-Armstrong et al. (2021) | G | 2 x 10 <sup>-10</sup> | 0.0296 unit decrease  | [0.021-0.039]   | ARL-†15.00            | G | -0.2671 | 0.2175 | 0.2209 |
| creatinine | rs35955110 | Sinnott-Armstrong et al. (2021) | C | 2 x 10 <sup>-23</sup> | 0.0257 unit increase  | [0.021-0.031]   | NFE2L2                | C | -0.1297 | 0.1059 | 0.2221 |
| creatinine | rs6142209  | Sinnott-Armstrong et al. (2021) | C | 3 x 10 <sup>-19</sup> | 0.0228 unit decrease  | [0.018-0.028]   | PIGU                  | C | 0.1173  | 0.0977 | 0.2315 |
| creatinine | rs4237268  | Graham et al. (2019)            | A | 5 x 10 <sup>-13</sup> | 0.04639 unit decrease | [0.035-0.058]   | PIP5K1B               | G | 0.1172  | 0.0979 | 0.2325 |
| creatinine | rs55678693 | Sinnott-Armstrong et al. (2021) | T | 2 x 10 <sup>-9</sup>  | 0.021 unit increase   | [0.014-0.028]   | NMRK2, DAPK3          | T | 0.1807  | 0.1526 | 0.2375 |
| creatinine | rs13175510 | Sinnott-Armstrong et al. (2021) | T | 2 x 10 <sup>-9</sup>  | 0.0274 unit increase  | [0.019-0.036]   | KRT18P56, LINC00604   | T | -0.1985 | 0.1677 | 0.2378 |
| creatinine | rs16946635 | Sinnott-Armstrong et al. (2021) | C | 4 x 10 <sup>-14</sup> | 0.0201 unit increase  | [0.015-0.025]   | SQOR                  | C | 0.1227  | 0.1039 | 0.2389 |
| creatinine | rs10109414 | Köttgen et al. (2010)           | T | 1 x 10 <sup>-8</sup>  | NR                    | NR              | STC1                  | T | 0.1142  | 0.0968 | 0.2394 |
| creatinine | rs10109414 | Pattaro et al. (2016)           | T | 4 x 10 <sup>-16</sup> | 0.0075 unit decrease  | [0.0057-0.0093] | STC1                  | T | 0.1142  | 0.0968 | 0.2394 |
| creatinine | rs2018675  | Sinnott-Armstrong et al. (2021) | T | 4 x 10 <sup>-12</sup> | 0.0175 unit decrease  | [0.013-0.022]   | SLC47A1               | T | -0.1209 | 0.1026 | 0.2399 |
| creatinine | rs4077189  | Sinnott-Armstrong et al. (2021) | A | 4 x 10 <sup>-12</sup> | 0.0284 unit increase  | [0.02-0.036]    | ETV5                  | A | -0.2027 | 0.1735 | 0.2441 |
| creatinine | rs3814995  | Sinnott-Armstrong et al. (2021) | T | 2 x 10 <sup>-16</sup> | 0.0213 unit decrease  | [0.016-0.026]   | NPHS1                 | T | 0.1207  | 0.1035 | 0.2452 |
| creatinine | rs7569236  | Sinnott-Armstrong et al. (2021) | T | 2 x 10 <sup>-11</sup> | 0.0344 unit increase  | [0.024-0.044]   | LRP2                  | T | -0.2781 | 0.2400 | 0.2479 |
| creatinine | rs983309   | Sinnott-Armstrong et al. (2021) | G | 2 x 10 <sup>-11</sup> | 0.0248 unit decrease  | [0.018-0.032]   | RNU6-526P, RNU6-1151P | T | -0.1686 | 0.1457 | 0.2484 |
| creatinine | rs11780207 | Sinnott-Armstrong et al. (2021) | A | 2 x 10 <sup>-13</sup> | 0.0184 unit decrease  | [0.014-0.023]   | BIN3                  | A | 0.1244  | 0.1079 | 0.2504 |
| creatinine | rs596881   | Sinnott-Armstrong et al. (2021) | C | 9 x 10 <sup>-40</sup> | 0.0507 unit increase  | [0.043-0.058]   | SLC22A2               | T | -0.2005 | 0.1740 | 0.2506 |
| creatinine | rs74379084 | Sinnott-Armstrong et al. (2021) | C | 1 x 10 <sup>-9</sup>  | 0.0443 unit increase  | [0.03-0.059]    | TARID                 | C | 0.5413  | 0.4709 | 0.2517 |
| creatinine | rs163884   | Sinnott-Armstrong et al. (2021) | A | 1 x 10 <sup>-10</sup> | 0.0195 unit decrease  | [0.014-0.025]   | DCDC1                 | C | -0.1378 | 0.1201 | 0.2523 |

|            |             |                                 |    |                       |                       |                 |                  |   |         |        |        |
|------------|-------------|---------------------------------|----|-----------------------|-----------------------|-----------------|------------------|---|---------|--------|--------|
| creatinine | rs3782787   | Kanai et al. (2018)             | NR | 7 x 10 <sup>-11</sup> | 0.02715 unit increase | [0.019-0.035]   | TSPAN9           | G | 0.1325  | 0.1158 | 0.2540 |
| creatinine | rs7275695   | Sinnott-Armstrong et al. (2021) | T  | 1 x 10 <sup>-10</sup> | 0.0164 unit increase  | [0.012-0.021]   | '-               | T | -0.1151 | 0.1021 | 0.2605 |
| creatinine | rs476235    | Sinnott-Armstrong et al. (2021) | A  | 2 x 10 <sup>-16</sup> | 0.0204 unit increase  | [0.016-0.025]   | SLC22A2          | A | 0.1109  | 0.0987 | 0.2624 |
| creatinine | rs113246091 | Gorski et al. (2017)            | A  | 2 x 10 <sup>-9</sup>  | 0.0095 unit decrease  | [0.0064-0.0126] | '-               | A | 0.1830  | 0.1634 | 0.2641 |
| creatinine | rs4305459   | Sinnott-Armstrong et al. (2021) | A  | 4 x 10 <sup>-10</sup> | 0.0245 unit increase  | [0.017-0.032]   | TRPC1            | G | -0.1920 | 0.1716 | 0.2644 |
| creatinine | rs11543349  | Yasukochi et al. (2018)         | C  | 3 x 10 <sup>-8</sup>  | 0.01 umol/L increase  | [0.0041-0.0159] | OGFR             | C | -0.2604 | 0.2339 | 0.2670 |
| creatinine | rs78573217  | Sinnott-Armstrong et al. (2021) | A  | 7 x 10 <sup>-21</sup> | 0.0562 unit increase  | [0.044-0.068]   | PRKAG2           | A | 0.3509  | 0.3158 | 0.2679 |
| creatinine | rs6851943   | Kanai et al. (2018)             | NR | 6 x 10 <sup>-9</sup>  | 0.02146 unit increase | [0.014-0.029]   | H2AZ1-DT         | T | -0.1143 | 0.1035 | 0.2707 |
| creatinine | rs665731    | Sinnott-Armstrong et al. (2021) | T  | 3 x 10 <sup>-9</sup>  | 0.0182 unit increase  | [0.012-0.024]   | ZBTB16           | T | 0.1220  | 0.1105 | 0.2708 |
| creatinine | rs6741055   | Sinnott-Armstrong et al. (2021) | G  | 3 x 10 <sup>-11</sup> | 0.0158 unit increase  | [0.011-0.021]   | PDE1A            | G | -0.1129 | 0.1029 | 0.2736 |
| creatinine | rs963837    | Pattaro et al. (2016)           | T  | 6 x 10 <sup>-18</sup> | 0.0078 unit decrease  | [0.006-0.0096]  | MPPED2-AS1       | C | -0.1054 | 0.0962 | 0.2747 |
| creatinine | rs963837    | Sinnott-Armstrong et al. (2021) | C  | 1 x 10 <sup>-65</sup> | 0.0411 unit decrease  | [0.036-0.046]   | MPPED2-AS1       | C | -0.1054 | 0.0962 | 0.2747 |
| creatinine | rs963837    | Kanai et al. (2018)             | NR | 3 x 10 <sup>-21</sup> | 0.03989 unit decrease | [0.032-0.048]   | MPPED2-AS1       | C | -0.1054 | 0.0962 | 0.2747 |
| creatinine | rs2888875   | Pattaro et al. (2016)           | A  | 7 x 10 <sup>-7</sup>  | 0.0041 unit increase  | [0.0025-0.0057] | THADA            | G | -0.1201 | 0.1105 | 0.2786 |
| creatinine | rs1800574   | Sinnott-Armstrong et al. (2021) | T  | 1 x 10 <sup>-15</sup> | 0.056 unit increase   | [0.042-0.07]    | HNF1A-AS1, HNF1A | T | -0.3154 | 0.2925 | 0.2821 |
| creatinine | rs7208487   | Sinnott-Armstrong et al. (2021) | G  | 2 x 10 <sup>-33</sup> | 0.0395 unit decrease  | [0.033-0.046]   | FBXL20           | G | -0.1410 | 0.1321 | 0.2868 |
| creatinine | rs7208487   | Pattaro et al. (2016)           | T  | 9 x 10 <sup>-14</sup> | 0.0091 unit decrease  | [0.0067-0.0115] | FBXL20           | G | -0.1410 | 0.1321 | 0.2868 |
| creatinine | rs59366264  | Sinnott-Armstrong et al. (2021) | G  | 8 x 10 <sup>-10</sup> | 0.0179 unit decrease  | [0.012-0.024]   | IMP3             | G | -0.1346 | 0.1271 | 0.2909 |
| creatinine | rs284859    | Sinnott-Armstrong et al. (2021) | T  | 3 x 10 <sup>-17</sup> | 0.0265 unit decrease  | [0.02-0.033]    | WBP1L            | T | 0.1488  | 0.1410 | 0.2925 |
| creatinine | rs267738    | Gorski et al. (2017)            | T  | 1 x 10 <sup>-14</sup> | 0.0091 unit decrease  | [0.0069-0.0113] | CERS2            | G | -0.1276 | 0.1228 | 0.3000 |

|            |             |                                 |    |                       |                       |                 |                  |   |         |        |        |
|------------|-------------|---------------------------------|----|-----------------------|-----------------------|-----------------|------------------|---|---------|--------|--------|
| creatinine | rs8023655   | Kanai et al. (2018)             | NR | 3 x 10 <sup>-9</sup>  | 0.02691 unit decrease | [0.018-0.036]   | AP4E1, RPL32P30  | C | -0.1357 | 0.1312 | 0.3024 |
| creatinine | rs117174465 | Sinnott-Armstrong et al. (2021) | G  | 1 x 10 <sup>-20</sup> | 0.0821 unit decrease  | [0.065-0.099]   | PTPN9, SIN3A     | G | 0.3591  | 0.3485 | 0.3041 |
| creatinine | rs117935574 | Sinnott-Armstrong et al. (2021) | T  | 2 x 10 <sup>-9</sup>  | 0.0498 unit decrease  | [0.034-0.066]   | LPA              | T | -0.2869 | 0.2790 | 0.3051 |
| creatinine | rs141428560 | Sinnott-Armstrong et al. (2021) | A  | 3 x 10 <sup>-9</sup>  | 0.0662 unit increase  | [0.044-0.088]   | SGO1-AS1         | A | -0.5295 | 0.5153 | 0.3054 |
| creatinine | rs9397738   | Sinnott-Armstrong et al. (2021) | A  | 8 x 10 <sup>-12</sup> | 0.0233 unit decrease  | [0.017-0.03]    | RPS4XP8, SCAF8   | G | 0.1188  | 0.1157 | 0.3058 |
| creatinine | rs549752    | Kanai et al. (2018)             | NR | 1 x 10 <sup>-25</sup> | 0.04186 unit decrease | [0.034-0.05]    | NFATC1           | G | 0.1143  | 0.1115 | 0.3066 |
| creatinine | rs4514898   | Sinnott-Armstrong et al. (2021) | T  | 8 x 10 <sup>-13</sup> | 0.0383 unit decrease  | [0.028-0.049]   | TPRKB, DUSP11    | T | -0.2034 | 0.1986 | 0.3069 |
| creatinine | rs223502    | Sinnott-Armstrong et al. (2021) | C  | 6 x 10 <sup>-14</sup> | 0.0197 unit decrease  | [0.015-0.025]   | MANBA            | C | -0.1138 | 0.1112 | 0.3075 |
| creatinine | rs16874052  | Sinnott-Armstrong et al. (2021) | G  | 9 x 10 <sup>-11</sup> | 0.0356 unit decrease  | [0.025-0.046]   | ERVH-1, PPARGC1A | G | -0.2697 | 0.2664 | 0.3125 |
| creatinine | rs1887646   | Sinnott-Armstrong et al. (2021) | A  | 6 x 10 <sup>-10</sup> | 0.0148 unit increase  | [0.01-0.02]     | LINC00393        | G | -0.1023 | 0.1016 | 0.3152 |
| creatinine | rs1365242   | Sinnott-Armstrong et al. (2021) | C  | 3 x 10 <sup>-21</sup> | 0.0227 unit increase  | [0.018-0.027]   | DUOXA1           | C | -0.0941 | 0.0961 | 0.3286 |
| creatinine | rs2727562   | Sinnott-Armstrong et al. (2021) | G  | 8 x 10 <sup>-20</sup> | 0.0246 unit decrease  | [0.019-0.03]    | PRKAG2           | G | -0.1131 | 0.1166 | 0.3335 |
| creatinine | rs11056396  | Sinnott-Armstrong et al. (2021) | C  | 2 x 10 <sup>-13</sup> | 0.0266 unit decrease  | [0.02-0.034]    | RERG             | C | 0.1392  | 0.1451 | 0.3384 |
| creatinine | rs3925584   | Graham et al. (2019)            | C  | 2 x 10 <sup>-9</sup>  | 0.03693 unit decrease | [0.026-0.048]   | DCDC1            | C | -0.0919 | 0.0960 | 0.3396 |
| creatinine | rs3925584   | Pattaro et al. (2016)           | T  | 5 x 10 <sup>-16</sup> | 0.0074 unit decrease  | [0.0056-0.0092] | DCDC1            | C | -0.0919 | 0.0960 | 0.3396 |
| creatinine | rs3925584   | Gorski et al. (2017)            | T  | 2 x 10 <sup>-16</sup> | 0.0079 unit decrease  | [0.0061-0.0097] | DCDC1            | C | -0.0919 | 0.0960 | 0.3396 |
| creatinine | rs807601    | Gorski et al. (2017)            | T  | 4 x 10 <sup>-11</sup> | 0.0067 unit increase  | [0.0047-0.0087] | DDX1, LINC01804  | T | -0.0967 | 0.1016 | 0.3426 |
| creatinine | rs807601    | Pattaro et al. (2016)           | T  | 7 x 10 <sup>-12</sup> | 0.0064 unit increase  | [0.0046-0.0082] | DDX1, LINC01804  | T | -0.0967 | 0.1016 | 0.3426 |
| creatinine | rs3750082   | Pattaro et al. (2016)           | A  | 3 x 10 <sup>-8</sup>  | 0.0045 unit increase  | [0.0029-0.0061] | KBTD2            | A | -0.0981 | 0.1032 | 0.3427 |
| creatinine | rs6088580   | Pattaro et al. (2016)           | C  | 2 x 10 <sup>-9</sup>  | 0.0049 unit decrease  | [0.0033-0.0065] | PIGU, NCOA6      | C | -0.0916 | 0.0970 | 0.3462 |

|            |            |                                 |    |                       |                        |                 |                    |   |         |        |        |
|------------|------------|---------------------------------|----|-----------------------|------------------------|-----------------|--------------------|---|---------|--------|--------|
| creatinine | rs691329   | Kanai et al. (2018)             | NR | 2 x 10 <sup>-8</sup>  | 0.02212 unit decrease  | [0.014-0.03]    | '-                 | C | -0.1138 | 0.1216 | 0.3508 |
| creatinine | rs267734   | Köttgen et al. (2010)           | C  | 1 x 10 <sup>-12</sup> | 0.01 unit increase     | [0.004-0.016]   | CERS2, ANXA9       | C | -0.1143 | 0.1223 | 0.3509 |
| creatinine | rs267734   | Pattaro et al. (2016)           | T  | 4 x 10 <sup>-13</sup> | 0.0079 unit decrease   | [0.0057-0.0101] | CERS2, ANXA9       | C | -0.1143 | 0.1223 | 0.3509 |
| creatinine | rs267734   | Pattaro et al. (2016)           | T  | 3 x 10 <sup>-12</sup> | 0.0079 unit decrease   | [0.0057-0.0101] | CERS2, ANXA9       | C | -0.1143 | 0.1223 | 0.3509 |
| creatinine | rs6971211  | Gorski et al. (2017)            | NR | 7 x 10 <sup>-8</sup>  | NR                     | NR              | SHH                | T | -0.0909 | 0.0972 | 0.3511 |
| creatinine | rs898696   | Kanai et al. (2018)             | NR | 2 x 10 <sup>-8</sup>  | 0.02056 unit decrease  | [0.013-0.028]   | SHH                | T | -0.0926 | 0.0991 | 0.3514 |
| creatinine | rs12438970 | Sinnott-Armstrong et al. (2021) | C  | 4 x 10 <sup>-23</sup> | 0.0527 unit increase   | [0.042-0.063]   | H3P39, SHF         | C | -0.2249 | 0.2422 | 0.3542 |
| creatinine | rs55792109 | Sinnott-Armstrong et al. (2021) | T  | 7 x 10 <sup>-10</sup> | 0.019 unit increase    | [0.013-0.025]   | ACSM3              | T | -0.1164 | 0.1254 | 0.3543 |
| creatinine | rs16989695 | Sinnott-Armstrong et al. (2021) | A  | 2 x 10 <sup>-9</sup>  | 0.0143 unit increase   | [0.0096-0.019]  | PLIN4              | G | -0.0862 | 0.0933 | 0.3563 |
| creatinine | rs3008858  | Sinnott-Armstrong et al. (2021) | C  | 3 x 10 <sup>-9</sup>  | 0.0161 unit increase   | [0.011-0.021]   | DNAI4              | G | -0.1037 | 0.1122 | 0.3563 |
| creatinine | rs1293298  | Sinnott-Armstrong et al. (2021) | C  | 2 x 10 <sup>-9</sup>  | 0.0173 unit increase   | [0.012-0.023]   | CTSB               | C | -0.1068 | 0.1162 | 0.3590 |
| creatinine | rs3902989  | Sinnott-Armstrong et al. (2021) | T  | 1 x 10 <sup>-9</sup>  | 0.0372 unit increase   | [0.025-0.049]   | HMG2P25, GRK7      | T | 0.1982  | 0.2160 | 0.3597 |
| creatinine | rs35472707 | Gorski et al. (2017)            | NR | 4 x 10 <sup>-6</sup>  | NR                     | NR              | LRP2               | T | -0.2309 | 0.2517 | 0.3600 |
| creatinine | rs729761   | Graham et al. (2019)            | G  | 2 x 10 <sup>-11</sup> | 0.045306 unit increase | [0.033-0.057]   | LINC02537, VEGFA   | T | -0.0972 | 0.1063 | 0.3616 |
| creatinine | rs79907881 | Sinnott-Armstrong et al. (2021) | T  | 2 x 10 <sup>-14</sup> | 0.0634 unit decrease   | [0.047-0.08]    | SLC22A3            | T | -0.2586 | 0.2842 | 0.3640 |
| creatinine | rs55653892 | Sinnott-Armstrong et al. (2021) | C  | 4 x 10 <sup>-9</sup>  | 0.0162 unit decrease   | [0.011-0.021]   | ANP32BP1, DNMT1P34 | C | -0.1011 | 0.1113 | 0.3649 |
| creatinine | rs55653892 | Sinnott-Armstrong et al. (2021) | C  | 4 x 10 <sup>-20</sup> | 0.0249 unit decrease   | [0.02-0.03]     | ANP32BP1, DNMT1P34 | C | -0.1011 | 0.1113 | 0.3649 |
| creatinine | rs2781656  | Kanai et al. (2018)             | NR | 3 x 10 <sup>-11</sup> | 0.02604 unit increase  | [0.018-0.034]   | ARG1               | T | 0.1136  | 0.1252 | 0.3653 |
| creatinine | rs55973697 | Sinnott-Armstrong et al. (2021) | C  | 7 x 10 <sup>-21</sup> | 0.0853 unit decrease   | [0.067-0.103]   | ULK3               | C | 0.5317  | 0.5867 | 0.3658 |
| creatinine | rs12437561 | Sinnott-Armstrong et al. (2021) | T  | 5 x 10 <sup>-10</sup> | 0.0208 unit increase   | [0.014-0.027]   | IGF1R              | T | 0.1237  | 0.1368 | 0.3667 |

|            |            |                                 |   |           |                        |                 |                |   |         |        |        |
|------------|------------|---------------------------------|---|-----------|------------------------|-----------------|----------------|---|---------|--------|--------|
| creatinine | rs4420638  | Sinnott-Armstrong et al. (2021) | G | 2 x 10-20 | 0.0282 unit decrease   | [0.022-0.034]   | APOC1, APOC1P1 | G | 0.1144  | 0.1270 | 0.3687 |
| creatinine | rs347685   | Köttgen et al. (2010)           | C | 3 x 10-11 | 1.09 unit increase     | [0.007-0.011]   | TFDP2          | C | -0.0939 | 0.1045 | 0.3697 |
| creatinine | rs347685   | Pattaro et al. (2016)           | A | 2 x 10-14 | 0.0077 unit decrease   | [0.0053-0.0101] | TFDP2          | C | -0.0939 | 0.1045 | 0.3697 |
| creatinine | rs6029516  | Sinnott-Armstrong et al. (2021) | T | 2 x 10-9  | 0.0145 unit decrease   | [0.0098-0.0192] | RNU2-52P       | T | -0.0889 | 0.0990 | 0.3699 |
| creatinine | rs1600249  | Sinnott-Armstrong et al. (2021) | T | 1 x 10-11 | 0.019 unit decrease    | [0.014-0.024]   | BLK            | T | -0.1049 | 0.1171 | 0.3715 |
| creatinine | rs3842752  | Sinnott-Armstrong et al. (2021) | A | 9 x 10-14 | 0.0213 unit increase   | [0.016-0.027]   | INS-IGF2, INS  | A | 0.1076  | 0.1202 | 0.3719 |
| creatinine | rs17391694 | Sinnott-Armstrong et al. (2021) | T | 2 x 10-9  | 0.0212 unit increase   | [0.014-0.028]   | GIPC2, RNFT1P2 | T | 0.1238  | 0.1388 | 0.3734 |
| creatinine | rs12451696 | Sinnott-Armstrong et al. (2021) | G | 5 x 10-10 | 0.0149 unit increase   | [0.01-0.02]     | SLC47A1        | G | 0.0899  | 0.1014 | 0.3767 |
| creatinine | rs35094860 | Sinnott-Armstrong et al. (2021) | G | 3 x 10-31 | 0.0489 unit decrease   | [0.041-0.057]   | '-             | G | 0.1679  | 0.1904 | 0.3790 |
| creatinine | rs72657823 | Sinnott-Armstrong et al. (2021) | A | 4 x 10-17 | 0.0425 unit decrease   | [0.033-0.052]   | CCDC158        | A | 0.2084  | 0.2367 | 0.3798 |
| creatinine | rs10062079 | Graham et al. (2019)            | A | 5 x 10-12 | 0.042873 unit increase | [0.032-0.054]   | C9, DAB2       | A | -0.0909 | 0.1034 | 0.3800 |
| creatinine | rs4805834  | Chambers et al. (2010)          | A | 5 x 10-8  | 1 % decrease           | [0.7-1.3]       | CEP89          | T | -0.1213 | 0.1380 | 0.3803 |
| creatinine | rs7106615  | Sinnott-Armstrong et al. (2021) | A | 5 x 10-11 | 0.0189 unit decrease   | [0.013-0.025]   | '-             | G | 0.0987  | 0.1124 | 0.3811 |
| creatinine | rs2235808  | Pattaro et al. (2016)           | C | 3 x 10-7  | 0.006 unit increase    | [0.0036-0.0084] | JPH2           | G | 0.1221  | 0.1403 | 0.3851 |
| creatinine | rs17216525 | Sinnott-Armstrong et al. (2021) | T | 2 x 10-12 | 0.0306 unit increase   | [0.022-0.039]   | PBX4, CILP2    | T | -0.1610 | 0.1856 | 0.3868 |
| creatinine | rs10869365 | Sinnott-Armstrong et al. (2021) | T | 1 x 10-32 | 0.0311 unit decrease   | [0.026-0.036]   | PIP5K1B        | T | -0.0979 | 0.1132 | 0.3881 |
| creatinine | rs28930677 | Sinnott-Armstrong et al. (2021) | T | 2 x 10-17 | 0.0483 unit increase   | [0.037-0.059]   | EPB41L5        | T | 0.2101  | 0.2433 | 0.3888 |
| creatinine | rs6143035  | Sinnott-Armstrong et al. (2021) | C | 3 x 10-9  | 0.0163 unit decrease   | [0.011-0.022]   | LAMA5          | C | -0.0962 | 0.1118 | 0.3903 |
| creatinine | rs67723215 | Sinnott-Armstrong et al. (2021) | C | 2 x 10-9  | 0.0189 unit increase   | [0.013-0.025]   | RPL13, CPNE7   | C | -0.1140 | 0.1340 | 0.3959 |
| creatinine | rs7247715  | Sinnott-Armstrong et al. (2021) | C | 1 x 10-32 | 0.0398 unit increase   | [0.033-0.046]   | FAAP24         | T | -0.1224 | 0.1440 | 0.3962 |

|            |            |                                 |    |           |                       |                 |                   |   |         |        |        |
|------------|------------|---------------------------------|----|-----------|-----------------------|-----------------|-------------------|---|---------|--------|--------|
| creatinine | rs422421   | Sinnott-Armstrong et al. (2021) | C  | 9 x 10-11 | 0.0188 unit increase  | [0.013-0.024]   | FGFR4             | T | -0.1014 | 0.1195 | 0.3970 |
| creatinine | rs744683   | Sinnott-Armstrong et al. (2021) | G  | 6 x 10-11 | 0.0158 unit decrease  | [0.011-0.021]   | STAMBP, ACTG2     | G | 0.0782  | 0.0936 | 0.4043 |
| creatinine | rs2990246  | Kanai et al. (2018)             | NR | 1 x 10-12 | 0.03958 unit decrease | [0.029-0.051]   | MTX1P1, GBAP1     | C | 0.0847  | 0.1017 | 0.4059 |
| creatinine | rs10758782 | Sinnott-Armstrong et al. (2021) | T  | 1 x 10-11 | 0.0346 unit decrease  | [0.025-0.045]   | TPD52L3, UHRF2    | G | 0.1777  | 0.2134 | 0.4060 |
| creatinine | rs4805025  | Sinnott-Armstrong et al. (2021) | T  | 4 x 10-13 | 0.0203 unit increase  | [0.015-0.026]   | FAAP24            | T | -0.0912 | 0.1101 | 0.4085 |
| creatinine | rs17216707 | Pattaro et al. (2016)           | T  | 9 x 10-15 | 0.0077 unit decrease  | [0.0057-0.0097] | CYP24A1, BCAS1    | C | 0.1060  | 0.1281 | 0.4090 |
| creatinine | rs11959928 | Pattaro et al. (2016)           | A  | 7 x 10-19 | 0.0082 unit decrease  | [0.0064-0.01]   | C9, DAB2          | A | -0.0850 | 0.1031 | 0.4108 |
| creatinine | rs11959928 | Pattaro et al. (2016)           | A  | 2 x 10-20 | 0.0083 unit decrease  | [0.0065-0.0101] | C9, DAB2          | A | -0.0850 | 0.1031 | 0.4108 |
| creatinine | rs11959928 | Köttgen et al. (2010)           | A  | 1 x 10-7  | 0.01 unit decrease    | [0.007-0.011]   | C9, DAB2          | A | -0.0850 | 0.1031 | 0.4108 |
| creatinine | rs7759001  | Pattaro et al. (2016)           | A  | 2 x 10-8  | 0.0051 unit decrease  | [0.0033-0.0069] | ZNF204P, ZNF391   | G | 0.1021  | 0.1243 | 0.4122 |
| creatinine | rs2290263  | Pattaro et al. (2016)           | A  | 7 x 10-7  | 0.0045 unit increase  | [0.0027-0.0063] | '-                | G | -0.0944 | 0.1152 | 0.4133 |
| creatinine | rs74469790 | Sinnott-Armstrong et al. (2021) | A  | 3 x 10-13 | 0.0354 unit increase  | [0.026-0.045]   | LINC00200, ADARB2 | A | 0.1413  | 0.1736 | 0.4166 |
| creatinine | rs241812   | Kanai et al. (2018)             | NR | 5 x 10-9  | 0.02155 unit decrease | [0.014-0.029]   | SIM1              | G | 0.0847  | 0.1054 | 0.4228 |
| creatinine | rs476633   | Pattaro et al. (2016)           | C  | 9 x 10-9  | 0.0051 unit increase  | [0.0033-0.0069] | INO80             | G | 0.0770  | 0.0962 | 0.4243 |
| creatinine | rs6712340  | Sinnott-Armstrong et al. (2021) | T  | 2 x 10-9  | 0.0203 unit decrease  | [0.014-0.027]   | TFCP2L1           | T | 0.1072  | 0.1343 | 0.4254 |
| creatinine | rs4968555  | Sinnott-Armstrong et al. (2021) | A  | 1 x 10-10 | 0.0341 unit decrease  | [0.024-0.044]   | BCAS3             | T | -0.1619 | 0.2030 | 0.4262 |
| creatinine | rs304930   | Sinnott-Armstrong et al. (2021) | C  | 2 x 10-17 | 0.0348 unit decrease  | [0.027-0.043]   | ATP9B, NFATC1     | C | 0.1307  | 0.1642 | 0.4268 |
| creatinine | rs11557049 | Sinnott-Armstrong et al. (2021) | T  | 1 x 10-14 | 0.0374 unit increase  | [0.028-0.047]   | PDE7A             | T | 0.1815  | 0.2282 | 0.4273 |
| creatinine | rs316009   | Pattaro et al. (2016)           | T  | 4 x 10-19 | 0.0131 unit increase  | [0.01-0.016]    | SLC22A2           | T | -0.1385 | 0.1743 | 0.4277 |
| creatinine | rs316020   | Kanai et al. (2018)             | NR | 1 x 10-11 | 0.0553 unit increase  | [0.039-0.071]   | SLC22A2           | A | -0.1385 | 0.1743 | 0.4277 |



|            |             |                                 |    |                       |                          |                 |                    |   |         |        |        |
|------------|-------------|---------------------------------|----|-----------------------|--------------------------|-----------------|--------------------|---|---------|--------|--------|
| creatinine | rs112994348 | Sinnott-Armstrong et al. (2021) | T  | 2 x 10 <sup>-9</sup>  | 0.0314 unit decrease     | [0.021-0.042]   | SIN3A              | T | -0.1685 | 0.2123 | 0.4284 |
| creatinine | rs11588837  | Sinnott-Armstrong et al. (2021) | G  | 3 x 10 <sup>-11</sup> | 0.0236 unit decrease     | [0.017-0.031]   | RN7SL480P, PLEKHO1 | G | 0.1156  | 0.1461 | 0.4300 |
| creatinine | rs2861422   | Pattaro et al. (2016)           | T  | 9 x 10 <sup>-14</sup> | 0.0074 unit increase     | [0.0054-0.0094] | TFDP2              | T | -0.0825 | 0.1044 | 0.4303 |
| creatinine | rs75933044  | Sinnott-Armstrong et al. (2021) | G  | 7 x 10 <sup>-11</sup> | 0.0256 unit decrease     | [0.018-0.033]   | VPS72, PIP5K1A     | G | 0.1475  | 0.1874 | 0.4321 |
| creatinine | rs77061140  | Sinnott-Armstrong et al. (2021) | T  | 3 x 10 <sup>-11</sup> | 0.0266 unit decrease     | [0.019-0.034]   | FOXO3              | T | -0.1273 | 0.1626 | 0.4344 |
| creatinine | rs1317983   | Gorski et al. (2017)            | T  | 1 x 10 <sup>-13</sup> | 0.008 unit increase      | [0.006-0.01]    | LINC02537, VEGFA   | T | -0.0822 | 0.1061 | 0.4390 |
| creatinine | rs881858    | Sinnott-Armstrong et al. (2021) | A  | 3 x 10 <sup>-62</sup> | 0.0428 unit increase     | [0.038-0.048]   | VEGFA, LINC02537   | G | -0.0822 | 0.1061 | 0.4390 |
| creatinine | rs881858    | Pattaro et al. (2016)           | A  | 4 x 10 <sup>-14</sup> | 0.0081 unit decrease     | [0.0059-0.0103] | VEGFA, LINC02537   | G | -0.0822 | 0.1061 | 0.4390 |
| creatinine | rs881858    | Köttgen et al. (2010)           | G  | 9 x 10 <sup>-14</sup> | 1.08 unit increase       | [0.007-0.015]   | VEGFA, LINC02537   | G | -0.0822 | 0.1061 | 0.4390 |
| creatinine | rs881858    | Kanai et al. (2018)             | NR | 4 x 10 <sup>-9</sup>  | 0.03291 unit increase    | [0.022-0.044]   | VEGFA, LINC02537   | G | -0.0822 | 0.1061 | 0.4390 |
| creatinine | rs9472135   | Pattaro et al. (2016)           | T  | 3 x 10 <sup>-15</sup> | 0.008 unit decrease      | [0.006-0.01]    | LINC02537, VEGFA   | C | -0.0822 | 0.1061 | 0.4390 |
| creatinine | rs116520905 | Sinnott-Armstrong et al. (2021) | G  | 2 x 10 <sup>-9</sup>  | 0.0317 unit increase     | [0.021-0.042]   | ABCG5, DYNC2LI1    | G | -0.1839 | 0.2373 | 0.4390 |
| creatinine | rs28607761  | Sinnott-Armstrong et al. (2021) | G  | 3 x 10 <sup>-14</sup> | 0.0227 unit increase     | [0.017-0.029]   | AP3B2, ACTG1P17    | G | 0.0915  | 0.1180 | 0.4391 |
| creatinine | rs17358000  | Rhee et al. (2013)              | NR | 8 x 10 <sup>-6</sup>  | 0.32975006 unit increase | [0.19-0.47]     | '-                 | C | 0.1416  | 0.1842 | 0.4429 |
| creatinine | rs12827428  | Rhee et al. (2013)              | NR | 5 x 10 <sup>-6</sup>  | 0.46655247 unit increase | [0.27-0.67]     | '-                 | C | -0.0879 | 0.1152 | 0.4462 |
| creatinine | rs158528    | Sinnott-Armstrong et al. (2021) | G  | 2 x 10 <sup>-10</sup> | 0.0161 unit increase     | [0.011-0.021]   | CYP24A1, BCAS1     | A | 0.0756  | 0.0993 | 0.4474 |
| creatinine | rs7475348   | Kanai et al. (2018)             | NR | 1 x 10 <sup>-16</sup> | 0.03327 unit decrease    | [0.025-0.041]   | MYPN               | T | 0.0781  | 0.1036 | 0.4518 |
| creatinine | rs13146355  | Gorski et al. (2017)            | A  | 3 x 10 <sup>-37</sup> | 0.0121 unit decrease     | [0.01-0.014]    | SHROOM3            | A | 0.0750  | 0.0998 | 0.4535 |
| creatinine | rs13146355  | Graham et al. (2019)            | A  | 1 x 10 <sup>-17</sup> | 0.051999 unit increase   | [0.041-0.063]   | SHROOM3            | A | 0.0750  | 0.0998 | 0.4535 |
| creatinine | rs11077558  | Sinnott-Armstrong et al. (2021) | G  | 1 x 10 <sup>-12</sup> | 0.0232 unit increase     | [0.017-0.03]    | WIPI1              | C | 0.1077  | 0.1435 | 0.4537 |

|            |             |                                 |    |           |                       |                 |                      |   |         |        |        |
|------------|-------------|---------------------------------|----|-----------|-----------------------|-----------------|----------------------|---|---------|--------|--------|
| creatinine | rs6795744   | Pattaro et al. (2016)           | A  | 3 x 10-8  | 0.006 unit increase   | [0.0038-0.0082] | WNT7A                | A | 0.1048  | 0.1400 | 0.4549 |
| creatinine | rs10794720  | Pattaro et al. (2016)           | T  | 5 x 10-8  | 0.0093 unit decrease  | [0.006-0.0126]  | WDR37                | T | 0.1325  | 0.1771 | 0.4553 |
| creatinine | rs10794720  | Köttgen et al. (2010)           | T  | 1 x 10-8  | 0.01 unit decrease    | [0.010-0.018]   | WDR37                | T | 0.1325  | 0.1771 | 0.4553 |
| creatinine | rs28362906  | Sinnott-Armstrong et al. (2021) | A  | 2 x 10-9  | 0.0304 unit decrease  | [0.02-0.04]     | SEMA7A               | A | -0.1677 | 0.2247 | 0.4565 |
| creatinine | rs33972313  | Sinnott-Armstrong et al. (2021) | T  | 1 x 10-9  | 0.039 unit increase   | [0.026-0.052]   | SLC23A1              | T | 0.2262  | 0.3032 | 0.4566 |
| creatinine | rs913423    | Pattaro et al. (2016)           | A  | 8 x 10-8  | 0.0043 unit decrease  | [0.0027-0.0059] | NIP7P1, CYP26A1      | G | 0.0732  | 0.0982 | 0.4571 |
| creatinine | rs948493    | Sinnott-Armstrong et al. (2021) | T  | 5 x 10-26 | 0.0265 unit increase  | [0.022-0.031]   | AP5B1, OVOL1         | T | 0.0794  | 0.1067 | 0.4577 |
| creatinine | rs10115104  | Sinnott-Armstrong et al. (2021) | C  | 4 x 10-10 | 0.0292 unit increase  | [0.02-0.038]    | PIP5K1B              | C | -0.1314 | 0.1767 | 0.4578 |
| creatinine | rs2954038   | Sinnott-Armstrong et al. (2021) | A  | 2 x 10-23 | 0.026 unit increase   | [0.021-0.031]   | TRIB1                | C | 0.0753  | 0.1016 | 0.4593 |
| creatinine | rs17556694  | Sinnott-Armstrong et al. (2021) | T  | 3 x 10-9  | 0.03 unit decrease    | [0.02-0.04]     | NRF1                 | T | 0.1686  | 0.2284 | 0.4612 |
| creatinine | rs2279238   | Kanai et al. (2018)             | NR | 2 x 10-8  | 0.02137 unit decrease | [0.014-0.029]   | NR1H3                | T | -0.1139 | 0.1544 | 0.4617 |
| creatinine | rs9682041   | Pattaro et al. (2016)           | T  | 3 x 10-8  | 0.0068 unit decrease  | [NR]            | SKIL                 | C | 0.1218  | 0.1668 | 0.4660 |
| creatinine | rs9682041   | Pattaro et al. (2016)           | T  | 4 x 10-8  | 0.0056 unit decrease  | [NR]            | SKIL                 | C | 0.1218  | 0.1668 | 0.4660 |
| creatinine | rs79370442  | Sinnott-Armstrong et al. (2021) | A  | 4 x 10-9  | 0.0414 unit decrease  | [0.028-0.055]   | SLC22A2              | A | -0.2336 | 0.3201 | 0.4664 |
| creatinine | rs4399402   | Kanai et al. (2018)             | NR | 6 x 10-9  | 0.02775 unit decrease | [0.018-0.037]   | SOX5                 | A | 0.0838  | 0.1152 | 0.4677 |
| creatinine | rs75530000  | Kanai et al. (2018)             | NR | 3 x 10-10 | 0.03013 unit increase | [0.021-0.04]    | CHAF1B               | T | -0.1335 | 0.1849 | 0.4712 |
| creatinine | rs2337106   | Kanai et al. (2018)             | NR | 5 x 10-9  | 0.02167 unit decrease | [0.014-0.029]   | SMAD7                | C | -0.0732 | 0.1021 | 0.4743 |
| creatinine | rs117116870 | Sinnott-Armstrong et al. (2021) | A  | 1 x 10-9  | 0.0564 unit increase  | [0.038-0.075]   | PRKAG2               | A | 0.2776  | 0.3904 | 0.4780 |
| creatinine | rs12935539  | Kanai et al. (2018)             | NR | 9 x 10-10 | 0.02436 unit increase | [0.017-0.032]   | LINC01571, RN7SKP142 | C | 0.0865  | 0.1227 | 0.4815 |
| creatinine | rs769449    | Sinnott-Armstrong et al. (2021) | A  | 5 x 10-23 | 0.0358 unit decrease  | [0.029-0.043]   | APOE                 | A | 0.1140  | 0.1633 | 0.4859 |

|            |             |                                 |    |                       |                       |                 |                |   |         |        |        |
|------------|-------------|---------------------------------|----|-----------------------|-----------------------|-----------------|----------------|---|---------|--------|--------|
| creatinine | rs6606567   | Sinnott-Armstrong et al. (2021) | G  | 2 x 10 <sup>-9</sup>  | 0.0188 unit decrease  | [0.013-0.025]   | CYSRT1         | A | -0.0948 | 0.1361 | 0.4869 |
| creatinine | rs4881540   | Sinnott-Armstrong et al. (2021) | T  | 8 x 10 <sup>-35</sup> | 0.0437 unit decrease  | [0.037-0.051]   | LARP4B         | C | -0.1078 | 0.1559 | 0.4900 |
| creatinine | rs72823347  | Sinnott-Armstrong et al. (2021) | T  | 2 x 10 <sup>-9</sup>  | 0.0292 unit decrease  | [0.02-0.039]    | RPL19          | T | -0.1731 | 0.2511 | 0.4912 |
| creatinine | rs11857703  | Sinnott-Armstrong et al. (2021) | A  | 5 x 10 <sup>-13</sup> | 0.0181 unit decrease  | [0.013-0.023]   | LACTB, TPM1    | A | -0.0676 | 0.0996 | 0.4977 |
| creatinine | rs72925159  | Sinnott-Armstrong et al. (2021) | G  | 7 x 10 <sup>-17</sup> | 0.0503 unit increase  | [0.039-0.062]   | MTX2           | G | 0.1598  | 0.2355 | 0.4981 |
| creatinine | rs11640962  | Sinnott-Armstrong et al. (2021) | G  | 4 x 10 <sup>-26</sup> | 0.0393 unit increase  | [0.032-0.047]   | PDILT          | G | 0.0913  | 0.1395 | 0.5137 |
| creatinine | rs56152258  | Sinnott-Armstrong et al. (2021) | A  | 4 x 10 <sup>-11</sup> | 0.0358 unit increase  | [0.025-0.046]   | DBN1           | A | 0.1333  | 0.2050 | 0.5162 |
| creatinine | rs11929195  | Sinnott-Armstrong et al. (2021) | G  | 5 x 10 <sup>-11</sup> | 0.0164 unit decrease  | [0.012-0.021]   | ILDR1          | A | 0.0703  | 0.1085 | 0.5177 |
| creatinine | rs2960266   | Sinnott-Armstrong et al. (2021) | T  | 4 x 10 <sup>-10</sup> | 0.0155 unit decrease  | [0.011-0.02]    | SH2B2          | T | 0.0663  | 0.1029 | 0.5199 |
| creatinine | rs58542926  | Sinnott-Armstrong et al. (2021) | T  | 2 x 10 <sup>-12</sup> | 0.0317 unit increase  | [0.023-0.041]   | TM6SF2         | T | -0.1334 | 0.2087 | 0.5233 |
| creatinine | rs8081144   | Sinnott-Armstrong et al. (2021) | A  | 9 x 10 <sup>-20</sup> | 0.0387 unit decrease  | [0.03-0.047]    | NEUROD2, CDK12 | A | -0.1381 | 0.2182 | 0.5275 |
| creatinine | rs12144044  | Gorski et al. (2017)            | A  | 3 x 10 <sup>-8</sup>  | 0.0061 unit decrease  | [0.0039-0.0083] | RHOC           | A | -0.0715 | 0.1134 | 0.5289 |
| creatinine | rs4665987   | Kanai et al. (2018)             | NR | 2 x 10 <sup>-21</sup> | 0.03616 unit decrease | [0.029-0.044]   | C2orf16, GCKR  | A | 0.0686  | 0.1099 | 0.5335 |
| creatinine | rs16852193  | Pattaro et al. (2016)           | T  | 7 x 10 <sup>-6</sup>  | 0.0061 unit increase  | [0.0034-0.0088] | EGFEM1P        | T | 0.0918  | 0.1473 | 0.5339 |
| creatinine | rs7860634   | Sinnott-Armstrong et al. (2021) | A  | 3 x 10 <sup>-9</sup>  | 0.0143 unit decrease  | [0.0096-0.019]  | LHX3           | G | 0.0601  | 0.0971 | 0.5369 |
| creatinine | rs117998181 | Sinnott-Armstrong et al. (2021) | C  | 3 x 10 <sup>-13</sup> | 0.0537 unit increase  | [0.039-0.068]   | PIP5K1B        | C | 0.1928  | 0.3126 | 0.5381 |
| creatinine | rs62435145  | Gorski et al. (2017)            | T  | 3 x 10 <sup>-8</sup>  | 0.0077 unit decrease  | [0.0052-0.0102] | UNCX           | G | 0.0690  | 0.1124 | 0.5399 |
| creatinine | rs10851885  | Gorski et al. (2017)            | A  | 3 x 10 <sup>-12</sup> | 0.0081 unit increase  | [0.0059-0.0103] | NRG4           | G | -0.0635 | 0.1049 | 0.5458 |
| creatinine | rs34720381  | Kanai et al. (2018)             | NR | 1 x 10 <sup>-8</sup>  | 0.0417 unit increase  | [0.027-0.056]   | PRRC2C         | T | 0.1111  | 0.1847 | 0.5481 |
| creatinine | rs11960179  | Pattaro et al. (2016)           | A  | 2 x 10 <sup>-7</sup>  | 0.0069 unit decrease  | [0.0044-0.0094] | '-             | A | 0.0912  | 0.1516 | 0.5482 |

|            |             |                                 |    |           |                          |                 |                      |   |         |        |        |
|------------|-------------|---------------------------------|----|-----------|--------------------------|-----------------|----------------------|---|---------|--------|--------|
| creatinine | rs17257827  | Graham et al. (2019)            | G  | 3 x 10-10 | 0.055041 unit increase   | [0.039-0.071]   | '-                   | G | 0.0912  | 0.1516 | 0.5482 |
| creatinine | rs34895486  | Sinnott-Armstrong et al. (2021) | C  | 1 x 10-17 | 0.0263 unit decrease     | [0.02-0.032]    | BCAS3                | C | 0.0848  | 0.1435 | 0.5552 |
| creatinine | rs307558    | Kanai et al. (2018)             | NR | 7 x 10-10 | 0.02628 unit decrease    | [0.018-0.035]   | SYN2                 | G | -0.0708 | 0.1202 | 0.5568 |
| creatinine | rs7503383   | Sinnott-Armstrong et al. (2021) | G  | 2 x 10-15 | 0.0342 unit increase     | [0.026-0.043]   | BCAS3                | A | -0.0965 | 0.1646 | 0.5581 |
| creatinine | rs112029703 | Gorski et al. (2017)            | A  | 1 x 10-9  | 0.0065 unit decrease     | [0.0045-0.0085] | PTPN12               | A | 0.0639  | 0.1091 | 0.5591 |
| creatinine | rs55748426  | Sinnott-Armstrong et al. (2021) | C  | 5 x 10-10 | 0.0181 unit increase     | [0.012-0.024]   | ARMC9, PSMD1         | C | 0.0665  | 0.1144 | 0.5619 |
| creatinine | rs72814468  | Sinnott-Armstrong et al. (2021) | C  | 3 x 10-18 | 0.0316 unit decrease     | [0.025-0.039]   | BABAM2               | C | 0.0866  | 0.1498 | 0.5636 |
| creatinine | rs836788    | Pattaro et al. (2016)           | T  | 1 x 10-7  | 0.0043 unit decrease     | [0.0027-0.0059] | LINC01337            | T | -0.0578 | 0.1003 | 0.5648 |
| creatinine | rs80237806  | Sinnott-Armstrong et al. (2021) | C  | 6 x 10-12 | 0.0403 unit increase     | [0.029-0.052]   | RAB24, MXD3          | C | 0.1497  | 0.2611 | 0.5671 |
| creatinine | rs77883876  | Sinnott-Armstrong et al. (2021) | C  | 1 x 10-9  | 0.0414 unit decrease     | [0.028-0.055]   | DHX40                | C | 0.2091  | 0.3667 | 0.5691 |
| creatinine | rs74617384  | Sinnott-Armstrong et al. (2021) | T  | 3 x 10-10 | 0.0283 unit increase     | [0.019-0.037]   | LPA                  | T | 0.1078  | 0.1900 | 0.5711 |
| creatinine | rs2576164   | Sinnott-Armstrong et al. (2021) | C  | 3 x 10-10 | 0.0153 unit decrease     | [0.011-0.02]    | RNLS                 | C | -0.0575 | 0.1016 | 0.5720 |
| creatinine | rs55733296  | Sinnott-Armstrong et al. (2021) | A  | 8 x 10-52 | 0.0952 unit increase     | [0.083-0.108]   | DCDC1                | A | -0.1543 | 0.2744 | 0.5746 |
| creatinine | rs17876047  | Sinnott-Armstrong et al. (2021) | A  | 4 x 10-11 | 0.0455 unit increase     | [0.032-0.059]   | F12, GRK6            | A | -0.1507 | 0.2700 | 0.5773 |
| creatinine | rs7213525   | Rhee et al. (2013)              | NR | 6 x 10-6  | 0.14873344 unit decrease | [0.084-0.213]   | NACA2, BRIP1         | A | 0.0564  | 0.1013 | 0.5787 |
| creatinine | rs267733    | Sinnott-Armstrong et al. (2021) | G  | 4 x 10-20 | 0.03 unit decrease       | [0.024-0.036]   | ANXA9                | G | -0.0786 | 0.1414 | 0.5791 |
| creatinine | rs12645890  | Sinnott-Armstrong et al. (2021) | G  | 1 x 10-10 | 0.0165 unit increase     | [0.011-0.022]   | LINC02600, LINC02171 | G | 0.0544  | 0.0988 | 0.5825 |
| creatinine | rs35259167  | Sinnott-Armstrong et al. (2021) | A  | 9 x 10-14 | 0.0269 unit decrease     | [0.02-0.034]    | KLHDC7A              | A | -0.0798 | 0.1451 | 0.5830 |
| creatinine | rs11670056  | Sinnott-Armstrong et al. (2021) | T  | 6 x 10-14 | 0.0343 unit increase     | [0.025-0.043]   | ELL                  | T | 0.0958  | 0.1759 | 0.5868 |
| creatinine | rs79091515  | Sinnott-Armstrong et al. (2021) | A  | 4 x 10-24 | 0.0763 unit increase     | [0.062-0.091]   | RNF2                 | A | 0.1851  | 0.3436 | 0.5906 |

|            |            |                                 |    |                       |                        |                 |                |   |         |        |        |
|------------|------------|---------------------------------|----|-----------------------|------------------------|-----------------|----------------|---|---------|--------|--------|
| creatinine | rs2071047  | Pattaro et al. (2016)           | A  | 3 x 10 <sup>-6</sup>  | 0.0038 unit increase   | [0.0022-0.0054] | BMP4           | A | 0.0537  | 0.0999 | 0.5917 |
| creatinine | rs9806724  | Sinnott-Armstrong et al. (2021) | C  | 6 x 10 <sup>-22</sup> | 0.0315 unit increase   | [0.025-0.038]   | C15orf48       | C | -0.0725 | 0.1365 | 0.5960 |
| creatinine | rs11604462 | Gorski et al. (2017)            | A  | 2 x 10 <sup>-9</sup>  | 0.006 unit decrease    | [0.0042-0.0078] | OVOL1, AP5B1   | A | 0.0568  | 0.1079 | 0.5992 |
| creatinine | rs13317787 | Stafford-Smith et al. (2015)    | A  | 5 x 10 <sup>-7</sup>  | 21.66 unit increase    | [13.19-30.13]   | LMCD1-AS1      | A | -0.1206 | 0.2316 | 0.6031 |
| creatinine | rs76476582 | Sinnott-Armstrong et al. (2021) | T  | 5 x 10 <sup>-12</sup> | 0.0365 unit decrease   | [0.026-0.047]   | SNX17          | T | 0.0990  | 0.1903 | 0.6036 |
| creatinine | rs6464165  | Graham et al. (2019)            | C  | 8 x 10 <sup>-12</sup> | 0.046266 unit increase | [0.034-0.058]   | PRKAG2         | C | -0.0591 | 0.1145 | 0.6061 |
| creatinine | rs7123489  | Kanai et al. (2018)             | NR | 2 x 10 <sup>-9</sup>  | 0.03034 unit increase  | [0.02-0.04]     | AP5B1, KRT8P26 | A | 0.0552  | 0.1076 | 0.6086 |
| creatinine | rs11042751 | Sinnott-Armstrong et al. (2021) | C  | 2 x 10 <sup>-12</sup> | 0.0198 unit increase   | [0.014-0.025]   | IGF2           | C | 0.0593  | 0.1165 | 0.6116 |
| creatinine | rs3127573  | Chambers et al. (2010)          | G  | 5 x 10 <sup>-9</sup>  | 1.1 % increase         | [0.8-1.4]       | SLC22A2        | G | 0.0763  | 0.1514 | 0.6148 |
| creatinine | rs3127573  | Sinnott-Armstrong et al. (2021) | G  | 2 x 10 <sup>-64</sup> | 0.0593 unit increase   | [0.052-0.066]   | SLC22A2        | G | 0.0763  | 0.1514 | 0.6148 |
| creatinine | rs2180314  | Sinnott-Armstrong et al. (2021) | G  | 3 x 10 <sup>-9</sup>  | 0.0143 unit increase   | [0.0096-0.019]  | GSTA2          | C | -0.0492 | 0.0978 | 0.6155 |
| creatinine | rs17001974 | Kanai et al. (2018)             | NR | 2 x 10 <sup>-13</sup> | 0.02934 unit decrease  | [0.022-0.037]   | MRTFA          | T | 0.0971  | 0.1938 | 0.6168 |
| creatinine | rs60394484 | Sinnott-Armstrong et al. (2021) | A  | 2 x 10 <sup>-14</sup> | 0.0424 unit increase   | [0.032-0.053]   | OPLAH, EXOSC4  | A | -0.1075 | 0.2185 | 0.6233 |
| creatinine | rs13094687 | Sinnott-Armstrong et al. (2021) | G  | 4 x 10 <sup>-10</sup> | 0.0162 unit decrease   | [0.011-0.021]   | PHF7           | G | -0.0513 | 0.1053 | 0.6265 |
| creatinine | rs2255293  | Sinnott-Armstrong et al. (2021) | C  | 2 x 10 <sup>-9</sup>  | 0.0177 unit decrease   | [0.012-0.023]   | MIR3681HG      | T | 0.0600  | 0.1232 | 0.6267 |
| creatinine | rs3850625  | Pattaro et al. (2016)           | A  | 7 x 10 <sup>-11</sup> | 0.0083 unit increase   | [NR]            | CACNA1S        | A | 0.0731  | 0.1513 | 0.6294 |
| creatinine | rs3850625  | Gorski et al. (2017)            | A  | 2 x 10 <sup>-8</sup>  | 0.0088 unit increase   | [0.0059-0.0117] | CACNA1S        | A | 0.0731  | 0.1513 | 0.6294 |
| creatinine | rs76621572 | Sinnott-Armstrong et al. (2021) | T  | 2 x 10 <sup>-24</sup> | 0.0677 unit decrease   | [0.055-0.081]   | PDILT          | T | 0.1413  | 0.2935 | 0.6306 |
| creatinine | rs73080977 | Sinnott-Armstrong et al. (2021) | T  | 1 x 10 <sup>-12</sup> | 0.0305 unit decrease   | [0.022-0.039]   | SEMA3F-AS1     | T | 0.0875  | 0.1828 | 0.6326 |
| creatinine | rs9788550  | Sinnott-Armstrong et al. (2021) | C  | 4 x 10 <sup>-9</sup>  | 0.0165 unit decrease   | [0.011-0.022]   | '-             | C | 0.0538  | 0.1134 | 0.6359 |

|            |             |                                 |    |                       |                          |                 |                     |   |         |        |        |
|------------|-------------|---------------------------------|----|-----------------------|--------------------------|-----------------|---------------------|---|---------|--------|--------|
| creatinine | rs115137643 | Sinnott-Armstrong et al. (2021) | T  | 3 x 10 <sup>-9</sup>  | 0.0507 unit increase     | [0.034-0.068]   | STBD1, FAM47E-STBD1 | T | -0.1658 | 0.3531 | 0.6392 |
| creatinine | rs5030873   | Graham et al. (2019)            | C  | 1 x 10 <sup>-20</sup> | 0.061138 unit increase   | [0.049-0.073]   | SLC34A1             | C | 0.0466  | 0.0993 | 0.6396 |
| creatinine | rs6420094   | Köttgen et al. (2010)           | G  | 1 x 10 <sup>-14</sup> | 0.01 unit decrease       | [0.007-0.015]   | SLC34A1             | G | 0.0466  | 0.0993 | 0.6396 |
| creatinine | rs6420094   | Pattaro et al. (2016)           | A  | 5 x 10 <sup>-22</sup> | 0.0096 unit increase     | [0.0076-0.0116] | SLC34A1             | G | 0.0466  | 0.0993 | 0.6396 |
| creatinine | rs1888357   | Rhee et al. (2013)              | NR | 9 x 10 <sup>-6</sup>  | 0.16882975 unit decrease | [0.094-0.243]   | OBI1-AS1            | C | -0.0477 | 0.1018 | 0.6401 |
| creatinine | rs10821826  | Sinnott-Armstrong et al. (2021) | G  | 6 x 10 <sup>-17</sup> | 0.0279 unit increase     | [0.021-0.034]   | ASAH2B              | A | -0.0666 | 0.1424 | 0.6406 |
| creatinine | rs41423644  | Sinnott-Armstrong et al. (2021) | C  | 5 x 10 <sup>-19</sup> | 0.0405 unit increase     | [0.032-0.049]   | TSPAN9              | C | -0.0818 | 0.1756 | 0.6415 |
| creatinine | rs72801433  | Sinnott-Armstrong et al. (2021) | G  | 2 x 10 <sup>-13</sup> | 0.0359 unit increase     | [0.026-0.046]   | ZCCHC10             | G | 0.0955  | 0.2060 | 0.6433 |
| creatinine | rs4014195   | Köttgen et al. (2010)           | G  | 1 x 10 <sup>-7</sup>  | 0.01 unit decrease       | [0.006-0.010]   | AP5B1, KRT8P26      | G | 0.0491  | 0.1067 | 0.6463 |
| creatinine | rs4014195   | Pattaro et al. (2016)           | C  | 1 x 10 <sup>-11</sup> | 0.0055 unit increase     | [0.0039-0.0071] | AP5B1, KRT8P26      | G | 0.0491  | 0.1067 | 0.6463 |
| creatinine | rs4014195   | Pattaro et al. (2016)           | C  | 3 x 10 <sup>-12</sup> | 0.005 unit increase      | [NR]            | AP5B1, KRT8P26      | G | 0.0491  | 0.1067 | 0.6463 |
| creatinine | rs16909119  | Rhee et al. (2013)              | NR | 5 x 10 <sup>-6</sup>  | 0.37830615 unit decrease | [0.22-0.54]     | FAM135B             | A | 0.0932  | 0.2034 | 0.6473 |
| creatinine | rs8068318   | Chambers et al. (2010)          | G  | 2 x 10 <sup>-8</sup>  | 0.8 % increase           | [0.6-1.0]       | TBX2, TBX2-AS1      | C | 0.0515  | 0.1126 | 0.6478 |
| creatinine | rs80282103  | Gorski et al. (2017)            | A  | 1 x 10 <sup>-11</sup> | 0.0123 unit increase     | [0.009-0.0156]  | LARP4B              | T | -0.0818 | 0.1790 | 0.6480 |
| creatinine | rs79513925  | Sinnott-Armstrong et al. (2021) | A  | 9 x 10 <sup>-16</sup> | 0.0292 unit decrease     | [0.022-0.036]   | TFDP2               | A | -0.0644 | 0.1413 | 0.6492 |
| creatinine | rs17319721  | Pattaro et al. (2016)           | A  | 1 x 10 <sup>-37</sup> | 0.0114 unit decrease     | [0.0096-0.0132] | SHROOM3             | A | 0.0456  | 0.1009 | 0.6517 |
| creatinine | rs17319721  | Köttgen et al. (2010)           | A  | 1 x 10 <sup>-19</sup> | NR                       | NR              | SHROOM3             | A | 0.0456  | 0.1009 | 0.6517 |
| creatinine | rs17319721  | Pattaro et al. (2016)           | A  | 5 x 10 <sup>-35</sup> | 0.0113 unit decrease     | [0.0095-0.0131] | SHROOM3             | A | 0.0456  | 0.1009 | 0.6517 |
| creatinine | rs72681869  | Sinnott-Armstrong et al. (2021) | C  | 2 x 10 <sup>-16</sup> | 0.0957 unit decrease     | [0.073-0.118]   | SOS-+2              | C | -0.1582 | 0.3513 | 0.6529 |
| creatinine | rs13296176  | Sinnott-Armstrong et al. (2021) | C  | 6 x 10 <sup>-10</sup> | 0.0239 unit decrease     | [0.016-0.032]   | B4GALT1             | C | -0.0774 | 0.1725 | 0.6543 |

|            |             |                                 |    |                       |                           |                 |                        |   |         |        |        |
|------------|-------------|---------------------------------|----|-----------------------|---------------------------|-----------------|------------------------|---|---------|--------|--------|
| creatinine | rs115030251 | Sinnott-Armstrong et al. (2021) | T  | 4 x 10 <sup>-13</sup> | 0.0253 unit increase      | [0.018-0.032]   | MYBPHL                 | T | -0.0684 | 0.1529 | 0.6550 |
| creatinine | rs7999846   | Sinnott-Armstrong et al. (2021) | T  | 2 x 10 <sup>-11</sup> | 0.0302 unit decrease      | [0.021-0.039]   | LINC02340              | T | -0.0915 | 0.2045 | 0.6551 |
| creatinine | rs10865190  | Sinnott-Armstrong et al. (2021) | T  | 2 x 10 <sup>-9</sup>  | 0.0176 unit decrease      | [0.012-0.023]   | ZFP36L2, LINC02580     | T | 0.0562  | 0.1258 | 0.6557 |
| creatinine | rs11747993  | Sinnott-Armstrong et al. (2021) | A  | 5 x 10 <sup>-11</sup> | 0.0181 unit increase      | [0.013-0.023]   | SLC6A19, CTD-3080P12.3 | A | 0.0518  | 0.1170 | 0.6587 |
| creatinine | rs79675564  | Sinnott-Armstrong et al. (2021) | A  | 1 x 10 <sup>-12</sup> | 0.0318 unit increase      | [0.023-0.041]   | LANCL1-AS1             | A | -0.0869 | 0.1966 | 0.6589 |
| creatinine | rs11602582  | Sinnott-Armstrong et al. (2021) | A  | 2 x 10 <sup>-11</sup> | 0.0382 unit increase      | [0.027-0.049]   | DCDC1                  | A | -0.1028 | 0.2332 | 0.6598 |
| creatinine | rs62412107  | Nagy et al. (2017)              | A  | 2 x 10 <sup>-8</sup>  | 0.15169783 mg/dl increase | [0.099-0.205]   | MIR548I2, OR7E83P      | A | 0.1035  | 0.2349 | 0.6599 |
| creatinine | rs70953677  | Sinnott-Armstrong et al. (2021) | T  | 2 x 10 <sup>-9</sup>  | 0.0472 unit increase      | [0.032-0.063]   | SLC22A7                | T | -0.1078 | 0.2459 | 0.6617 |
| creatinine | rs8121155   | Sinnott-Armstrong et al. (2021) | C  | 4 x 10 <sup>-9</sup>  | 0.0282 unit increase      | [0.019-0.038]   | ZBTB46, C20orf181      | C | 0.0822  | 0.1876 | 0.6618 |
| creatinine | rs1508442   | Rhee et al. (2013)              | NR | 1 x 10 <sup>-6</sup>  | 0.16735528 unit increase  | [0.099-0.235]   | LAMA2, Y_RNA           | T | 0.0445  | 0.1021 | 0.6632 |
| creatinine | rs28698773  | Sinnott-Armstrong et al. (2021) | C  | 7 x 10 <sup>-18</sup> | 0.0324 unit decrease      | [0.025-0.04]    | DAB2                   | C | -0.0654 | 0.1512 | 0.6656 |
| creatinine | rs724950    | Sinnott-Armstrong et al. (2021) | C  | 3 x 10 <sup>-12</sup> | 0.0166 unit decrease      | [0.012-0.021]   | '-                     | C | -0.0428 | 0.0990 | 0.6663 |
| creatinine | rs848490    | Pattaro et al. (2016)           | C  | 8 x 10 <sup>-13</sup> | 0.0073 unit increase      | [0.0053-0.0093] | PHTF2                  | G | 0.0477  | 0.1123 | 0.6714 |
| creatinine | rs848490    | Pattaro et al. (2016)           | C  | 1 x 10 <sup>-12</sup> | 0.0074 unit increase      | [0.0054-0.0094] | PHTF2                  | G | 0.0477  | 0.1123 | 0.6714 |
| creatinine | rs6421983   | Sinnott-Armstrong et al. (2021) | T  | 4 x 10 <sup>-9</sup>  | 0.0143 unit increase      | [0.0096-0.019]  | IFITM3                 | T | 0.0418  | 0.1002 | 0.6773 |
| creatinine | rs9962915   | Gorski et al. (2017)            | T  | 7 x 10 <sup>-9</sup>  | 0.0055 unit decrease      | [0.0035-0.0075] | EPB41L3                | T | -0.0397 | 0.0959 | 0.6791 |
| creatinine | rs151245    | Sinnott-Armstrong et al. (2021) | T  | 8 x 10 <sup>-16</sup> | 0.0197 unit increase      | [0.015-0.024]   | AQP4-AS1               | G | -0.0402 | 0.0979 | 0.6819 |
| creatinine | rs2050605   | Rhee et al. (2013)              | NR | 9 x 10 <sup>-6</sup>  | 0.1742692 unit decrease   | [0.097-0.251]   | '-                     | T | 0.0481  | 0.1179 | 0.6836 |
| creatinine | rs9996493   | Sinnott-Armstrong et al. (2021) | G  | 2 x 10 <sup>-11</sup> | 0.0196 unit increase      | [0.014-0.025]   | SHROOM3                | G | 0.0483  | 0.1200 | 0.6879 |
| creatinine | rs75772464  | Sinnott-Armstrong et al. (2021) | C  | 2 x 10 <sup>-9</sup>  | 0.0317 unit increase      | [0.022-0.042]   | SNUPN                  | C | 0.0903  | 0.2272 | 0.6915 |

|            |            |                                 |    |           |                        |                 |                          |   |         |        |        |
|------------|------------|---------------------------------|----|-----------|------------------------|-----------------|--------------------------|---|---------|--------|--------|
| creatinine | rs56087592 | Sinnott-Armstrong et al. (2021) | T  | 2 x 10-14 | 0.0421 unit increase   | [0.031-0.053]   | SHROOM3                  | T | -0.0893 | 0.2270 | 0.6944 |
| creatinine | rs41271951 | Sinnott-Armstrong et al. (2021) | G  | 7 x 10-23 | 0.0427 unit decrease   | [0.034-0.051]   | CTSS                     | G | -0.0688 | 0.1771 | 0.6982 |
| creatinine | rs2279463  | Graham et al. (2019)            | G  | 1 x 10-14 | 0.071368 unit increase | [0.055-0.088]   | SLC22A2                  | G | 0.0580  | 0.1502 | 0.6998 |
| creatinine | rs2279463  | Pattaro et al. (2016)           | A  | 7 x 10-18 | 0.0119 unit increase   | [0.0092-0.0146] | SLC22A2                  | G | 0.0580  | 0.1502 | 0.6998 |
| creatinine | rs2279463  | Gorski et al. (2017)            | A  | 1 x 10-15 | 0.0118 unit increase   | [0.0091-0.0145] | SLC22A2                  | G | 0.0580  | 0.1502 | 0.6998 |
| creatinine | rs2279463  | Köttgen et al. (2010)           | G  | 6 x 10-12 | 0.01 unit decrease     | [0.009-0.017]   | SLC22A2                  | G | 0.0580  | 0.1502 | 0.6998 |
| creatinine | rs84178    | Gorski et al. (2017)            | A  | 4 x 10-9  | 0.0078 unit decrease   | [0.0054-0.0102] | KCNQ1                    | A | -0.0533 | 0.1389 | 0.7019 |
| creatinine | rs12136063 | Pattaro et al. (2016)           | A  | 5 x 10-8  | 0.0045 unit increase   | [0.0029-0.0061] | SYPL2                    | G | -0.0416 | 0.1086 | 0.7022 |
| creatinine | rs4690095  | Kanai et al. (2018)             | NR | 9 x 10-11 | 0.02386 unit increase  | [0.017-0.031]   | RGS12                    | T | 0.0391  | 0.1022 | 0.7023 |
| creatinine | rs12592862 | Sinnott-Armstrong et al. (2021) | T  | 3 x 10-28 | 0.0657 unit increase   | [0.054-0.077]   | SLC30A4, C15orf48        | T | 0.0871  | 0.2277 | 0.7026 |
| creatinine | rs11706052 | Sinnott-Armstrong et al. (2021) | G  | 2 x 10-13 | 0.0285 unit decrease   | [0.021-0.036]   | IMPDH2                   | G | -0.0619 | 0.1628 | 0.7041 |
| creatinine | rs10774021 | Köttgen et al. (2010)           | C  | 1 x 10-9  | 1.05 unit increase     | [0.006-0.010]   | SLC6A13                  | C | -0.0391 | 0.1033 | 0.7054 |
| creatinine | rs10774021 | Pattaro et al. (2016)           | T  | 5 x 10-12 | 0.0063 unit decrease   | [0.0045-0.0081] | SLC6A13                  | C | -0.0391 | 0.1033 | 0.7054 |
| creatinine | rs10774021 | Pattaro et al. (2016)           | T  | 1 x 10-12 | 0.0067 unit decrease   | [0.0049-0.0085] | SLC6A13                  | C | -0.0391 | 0.1033 | 0.7054 |
| creatinine | rs6060139  | Graham et al. (2019)            | C  | 9 x 10-9  | 0.03545 unit increase  | [0.024-0.046]   | MYH7B                    | T | 0.0373  | 0.0986 | 0.7055 |
| creatinine | rs2738787  | Sinnott-Armstrong et al. (2021) | G  | 1 x 10-11 | 0.0296 unit decrease   | [0.021-0.038]   | RTEL1-TNFRSF6B, TNFRSF6B | A | 0.0645  | 0.1735 | 0.7102 |
| creatinine | rs34209642 | Sinnott-Armstrong et al. (2021) | A  | 4 x 10-41 | 0.0413 unit decrease   | [0.035-0.047]   | DAB2                     | A | -0.0471 | 0.1273 | 0.7120 |
| creatinine | rs71359461 | Gorski et al. (2017)            | C  | 4 x 10-10 | 0.0086 unit decrease   | [0.0061-0.0111] | NFATC1                   | C | -0.0377 | 0.1022 | 0.7126 |
| creatinine | rs1275609  | Kanai et al. (2018)             | NR | 1 x 10-12 | 0.02821 unit decrease  | [0.02-0.036]    | RN7SL734P                | A | -0.0358 | 0.0981 | 0.7156 |
| creatinine | rs72708294 | Sinnott-Armstrong et al. (2021) | A  | 1 x 10-10 | 0.046 unit increase    | [0.032-0.06]    | PMF1, PMF1-BGLAP         | A | -0.0932 | 0.2598 | 0.7201 |



|            |            |                                 |   |           |                        |                 |                        |   |         |        |        |
|------------|------------|---------------------------------|---|-----------|------------------------|-----------------|------------------------|---|---------|--------|--------|
| creatinine | rs10277115 | Pattaro et al. (2016)           | A | 2 x 10-14 | 0.0084 unit increase   | [NR]            | UNCX                   | A | -0.0441 | 0.1232 | 0.7210 |
| creatinine | rs10277115 | Pattaro et al. (2016)           | A | 9 x 10-14 | 0.009 unit increase    | [0.0066-0.0114] | UNCX                   | A | -0.0441 | 0.1232 | 0.7210 |
| creatinine | rs2955742  | Sinnott-Armstrong et al. (2021) | A | 5 x 10-21 | 0.0299 unit increase   | [0.024-0.036]   | TMEM266                | A | -0.0454 | 0.1278 | 0.7226 |
| creatinine | rs11901633 | Sinnott-Armstrong et al. (2021) | C | 2 x 10-12 | 0.0209 unit increase   | [0.015-0.027]   | '                      | C | -0.0432 | 0.1224 | 0.7243 |
| creatinine | rs73167017 | Sinnott-Armstrong et al. (2021) | A | 3 x 10-12 | 0.0378 unit decrease   | [0.027-0.048]   | ADSL, SGSM3, SGSM3-AS1 | A | -0.0995 | 0.2828 | 0.7252 |
| creatinine | rs1394125  | Sinnott-Armstrong et al. (2021) | A | 5 x 10-55 | 0.0387 unit increase   | [0.034-0.044]   | UBE2Q2                 | A | 0.0351  | 0.0999 | 0.7257 |
| creatinine | rs1394125  | Pattaro et al. (2016)           | A | 5 x 10-14 | 0.0073 unit decrease   | [0.0053-0.0093] | UBE2Q2                 | A | 0.0351  | 0.0999 | 0.7257 |
| creatinine | rs1394125  | Köttgen et al. (2010)           | A | 3 x 10-17 | 0.01 unit decrease     | [0.007-0.011]   | UBE2Q2                 | A | 0.0351  | 0.0999 | 0.7257 |
| creatinine | rs1394125  | Pattaro et al. (2016)           | A | 6 x 10-13 | 0.0072 unit decrease   | [0.0052-0.0092] | UBE2Q2                 | A | 0.0351  | 0.0999 | 0.7257 |
| creatinine | rs780093   | Gorski et al. (2017)            | T | 2 x 10-16 | 0.0081 unit increase   | [0.0063-0.0099] | GCKR                   | T | 0.0348  | 0.1007 | 0.7301 |
| creatinine | rs836968   | Sinnott-Armstrong et al. (2021) | T | 2 x 10-9  | 0.0162 unit decrease   | [0.011-0.021]   | FAIM2                  | T | -0.0393 | 0.1164 | 0.7358 |
| creatinine | rs2467853  | Pattaro et al. (2016)           | T | 1 x 10-42 | 0.0126 unit increase   | [0.011-0.014]   | SPATA5L1               | G | -0.0334 | 0.1007 | 0.7406 |
| creatinine | rs2467853  | Graham et al. (2019)            | G | 1 x 10-26 | 0.066702 unit increase | [0.056-0.078]   | SPATA5L1               | G | -0.0334 | 0.1007 | 0.7406 |
| creatinine | rs10791821 | Sinnott-Armstrong et al. (2021) | A | 1 x 10-9  | 0.0165 unit decrease   | [0.011-0.022]   | MAP3K11                | A | 0.0347  | 0.1060 | 0.7440 |
| creatinine | rs62025168 | Sinnott-Armstrong et al. (2021) | A | 2 x 10-44 | 0.043 unit decrease    | [0.037-0.049]   | RNU6-953P, GATM        | A | -0.0399 | 0.1233 | 0.7467 |
| creatinine | rs9369305  | Sinnott-Armstrong et al. (2021) | T | 1 x 10-9  | 0.0189 unit increase   | [0.013-0.025]   | TFEB                   | T | 0.0412  | 0.1276 | 0.7474 |
| creatinine | rs491567   | Pattaro et al. (2016)           | A | 1 x 10-12 | 0.0078 unit decrease   | [0.0056-0.01]   | WDR72                  | C | 0.0407  | 0.1266 | 0.7483 |
| creatinine | rs491567   | Köttgen et al. (2010)           | C | 3 x 10-13 | 0.01 unit increase     | [0.005-0.013]   | WDR72                  | C | 0.0407  | 0.1266 | 0.7483 |
| creatinine | rs491567   | Pattaro et al. (2016)           | A | 3 x 10-15 | 0.0084 unit decrease   | [0.0064-0.0104] | WDR72                  | C | 0.0407  | 0.1266 | 0.7483 |
| creatinine | rs6068816  | Sinnott-Armstrong et al. (2021) | T | 3 x 10-11 | 0.0258 unit decrease   | [0.018-0.033]   | CYP24A1                | T | 0.0530  | 0.1665 | 0.7505 |

|            |             |                                 |    |                        |                       |                 |                         |   |         |        |        |
|------------|-------------|---------------------------------|----|------------------------|-----------------------|-----------------|-------------------------|---|---------|--------|--------|
| creatinine | rs10513801  | Pattaro et al. (2016)           | T  | 1 x 10 <sup>-9</sup>   | 0.0072 unit increase  | [NR]            | ETV5                    | G | -0.0422 | 0.1333 | 0.7521 |
| creatinine | rs6809651   | Gorski et al. (2017)            | A  | 2 x 10 <sup>-8</sup>   | 0.0081 unit decrease  | [0.0054-0.0108] | ETV5                    | A | -0.0422 | 0.1333 | 0.7521 |
| creatinine | rs2453580   | Pattaro et al. (2016)           | T  | 3 x 10 <sup>-11</sup>  | 0.0064 unit increase  | [0.0046-0.0082] | SLC47A1                 | C | -0.0307 | 0.0978 | 0.7539 |
| creatinine | rs2453580   | Pattaro et al. (2016)           | T  | 3 x 10 <sup>-13</sup>  | 0.0073 unit increase  | [0.0053-0.0093] | SLC47A1                 | C | -0.0307 | 0.0978 | 0.7539 |
| creatinine | rs894680    | Gorski et al. (2017)            | A  | 5 x 10 <sup>-12</sup>  | 0.0074 unit decrease  | [0.0054-0.0094] | SLC47A1                 | A | -0.0307 | 0.0978 | 0.7539 |
| creatinine | rs6026578   | Kanai et al. (2018)             | NR | 3 x 10 <sup>-10</sup>  | 0.02583 unit decrease | [0.018-0.034]   | GNAS                    | C | -0.0310 | 0.1002 | 0.7575 |
| creatinine | rs9895661   | Sinnott-Armstrong et al. (2021) | T  | 3 x 10 <sup>-100</sup> | 0.0664 unit decrease  | [0.06-0.072]    | BCAS3                   | C | 0.0400  | 0.1299 | 0.7585 |
| creatinine | rs9895661   | Gorski et al. (2017)            | T  | 4 x 10 <sup>-21</sup>  | 0.0125 unit increase  | [0.01-0.015]    | BCAS3                   | C | 0.0400  | 0.1299 | 0.7585 |
| creatinine | rs9895661   | Pattaro et al. (2016)           | T  | 3 x 10 <sup>-22</sup>  | 0.0121 unit increase  | [0.0097-0.0145] | BCAS3                   | C | 0.0400  | 0.1299 | 0.7585 |
| creatinine | rs9895661   | Kanai et al. (2018)             | NR | 2 x 10 <sup>-25</sup>  | 0.04348 unit decrease | [0.035-0.052]   | BCAS3                   | C | 0.0400  | 0.1299 | 0.7585 |
| creatinine | rs9895661   | Köttgen et al. (2010)           | C  | 1 x 10 <sup>-15</sup>  | 0.01 unit decrease    | [0.007-0.015]   | BCAS3                   | C | 0.0400  | 0.1299 | 0.7585 |
| creatinine | rs9895661   | Hishida et al. (2018)           | T  | 2 x 10 <sup>-11</sup>  | 0.0108 unit decrease  | [0.0081-0.0135] | BCAS3                   | C | 0.0400  | 0.1299 | 0.7585 |
| creatinine | rs13016086  | Sinnott-Armstrong et al. (2021) | C  | 3 x 10 <sup>-14</sup>  | 0.0285 unit increase  | [0.021-0.036]   | BABAM2                  | C | 0.0518  | 0.1721 | 0.7636 |
| creatinine | rs61303167  | Sinnott-Armstrong et al. (2021) | T  | 5 x 10 <sup>-11</sup>  | 0.0209 unit decrease  | [0.015-0.027]   | STYXL1                  | T | -0.0383 | 0.1284 | 0.7659 |
| creatinine | rs115604285 | Sinnott-Armstrong et al. (2021) | T  | 1 x 10 <sup>-15</sup>  | 0.0594 unit increase  | [0.045-0.074]   | TFDP2                   | T | 0.0818  | 0.2810 | 0.7714 |
| creatinine | rs13077498  | Sinnott-Armstrong et al. (2021) | T  | 2 x 10 <sup>-13</sup>  | 0.0283 unit decrease  | [0.021-0.036]   | C3orf62                 | T | -0.0473 | 0.1631 | 0.7722 |
| creatinine | rs7948458   | Sinnott-Armstrong et al. (2021) | C  | 5 x 10 <sup>-17</sup>  | 0.0253 unit increase  | [0.019-0.031]   | INS-IGF2                | A | 0.0380  | 0.1366 | 0.7809 |
| creatinine | rs3770636   | Sinnott-Armstrong et al. (2021) | G  | 5 x 10 <sup>-22</sup>  | 0.094 unit decrease   | [0.075-0.113]   | LRP2                    | G | 0.1175  | 0.4230 | 0.7814 |
| creatinine | rs73688224  | Sinnott-Armstrong et al. (2021) | G  | 3 x 10 <sup>-10</sup>  | 0.0442 unit increase  | [0.03-0.058]    | LINC01449,<br>LINC01450 | G | 0.0777  | 0.2802 | 0.7819 |
| creatinine | rs1933182   | Köttgen et al. (2010)           | A  | 1 x 10 <sup>-7</sup>   | 0.01 unit decrease    | [0.006-0.010]   | SYPL2, PSMA5            | A | -0.0294 | 0.1084 | 0.7866 |

|            |            |                                 |    |           |                       |                 |                |   |         |        |        |
|------------|------------|---------------------------------|----|-----------|-----------------------|-----------------|----------------|---|---------|--------|--------|
| creatinine | rs10994856 | Gorski et al. (2017)            | A  | 5 x 10-9  | 0.0075 unit increase  | [0.0051-0.0099] | A1CF           | A | 0.0316  | 0.1182 | 0.7894 |
| creatinine | rs10994860 | Pattaro et al. (2016)           | T  | 1 x 10-12 | 0.0077 unit increase  | [NR]            | A1CF           | T | 0.0316  | 0.1182 | 0.7894 |
| creatinine | rs76578497 | Sinnott-Armstrong et al. (2021) | G  | 2 x 10-22 | 0.087 unit increase   | [0.07-0.104]    | RNF112, MFAP4  | G | 0.0958  | 0.3653 | 0.7933 |
| creatinine | rs6464772  | Williams et al. (2015)          | NR | 4 x 10-6  | NR                    | NR              | MKRN1, RAB19   | A | 0.0266  | 0.1021 | 0.7950 |
| creatinine | rs626277   | Pattaro et al. (2016)           | A  | 1 x 10-7  | 0.0049 unit decrease  | [0.0031-0.0067] | DACH1          | C | -0.0269 | 0.1035 | 0.7955 |
| creatinine | rs626277   | Köttgen et al. (2010)           | C  | 3 x 10-11 | 0.01 unit increase    | [0.007-0.011]   | DACH1          | C | -0.0269 | 0.1035 | 0.7955 |
| creatinine | rs716877   | Kanai et al. (2018)             | NR | 4 x 10-13 | 0.03724 unit increase | [0.027-0.047]   | DACH1          | C | -0.0269 | 0.1035 | 0.7955 |
| creatinine | rs716877   | Pattaro et al. (2016)           | C  | 6 x 10-8  | 0.0049 unit increase  | [0.0031-0.0067] | DACH1          | C | -0.0269 | 0.1035 | 0.7955 |
| creatinine | rs35411989 | Sinnott-Armstrong et al. (2021) | T  | 2 x 10-11 | 0.0159 unit increase  | [0.011-0.021]   | WDR1           | T | 0.0260  | 0.1009 | 0.7970 |
| creatinine | rs6503496  | Sinnott-Armstrong et al. (2021) | T  | 8 x 10-10 | 0.0362 unit increase  | [0.025-0.048]   | STAC2          | C | -0.0683 | 0.2660 | 0.7976 |
| creatinine | rs9945126  | Sinnott-Armstrong et al. (2021) | G  | 1 x 10-14 | 0.0187 unit decrease  | [0.014-0.023]   | SMAD7          | C | -0.0256 | 0.1008 | 0.8000 |
| creatinine | rs12458009 | Gorski et al. (2017)            | T  | 3 x 10-8  | 0.0064 unit decrease  | [0.004-0.0088]  | LINC01544      | G | 0.0342  | 0.1347 | 0.8001 |
| creatinine | rs1260326  | Pattaro et al. (2016)           | T  | 3 x 10-14 | 0.0068 unit increase  | [0.005-0.0086]  | GCKR           | T | 0.0253  | 0.1014 | 0.8029 |
| creatinine | rs1260326  | Pattaro et al. (2016)           | T  | 2 x 10-12 | 0.0065 unit increase  | [0.0047-0.0083] | GCKR           | T | 0.0253  | 0.1014 | 0.8029 |
| creatinine | rs1260326  | Köttgen et al. (2010)           | T  | 3 x 10-14 | 0.01 unit increase    | [0.007-0.011]   | GCKR           | T | 0.0253  | 0.1014 | 0.8029 |
| creatinine | rs35925637 | Kanai et al. (2018)             | NR | 4 x 10-9  | 0.02148 unit decrease | [0.014-0.029]   | TNP1, FABP5P14 | A | 0.0254  | 0.1019 | 0.8033 |
| creatinine | rs1044261  | Pattaro et al. (2016)           | T  | 1 x 10-11 | 0.0113 unit decrease  | [0.0082-0.0144] | IDI2, GTPBP4   | T | -0.0455 | 0.1839 | 0.8047 |
| creatinine | rs1044261  | Sinnott-Armstrong et al. (2021) | T  | 3 x 10-33 | 0.0545 unit increase  | [0.046-0.063]   | IDI2, GTPBP4   | T | -0.0455 | 0.1839 | 0.8047 |
| creatinine | rs1051978  | Sinnott-Armstrong et al. (2021) | A  | 7 x 10-18 | 0.0317 unit decrease  | [0.024-0.039]   | NFATC1         | A | -0.0338 | 0.1397 | 0.8088 |
| creatinine | rs11097396 | Sinnott-Armstrong et al. (2021) | G  | 6 x 10-37 | 0.0347 unit decrease  | [0.029-0.04]    | SHROOM3        | G | 0.0268  | 0.1140 | 0.8142 |

|            |             |                                 |    |                       |                       |                 |                  |   |         |        |        |
|------------|-------------|---------------------------------|----|-----------------------|-----------------------|-----------------|------------------|---|---------|--------|--------|
| creatinine | rs10127790  | Gorski et al. (2017)            | T  | 8 x 10 <sup>-9</sup>  | 0.0061 unit increase  | [0.0041-0.0081] | SORT1            | C | 0.0251  | 0.1080 | 0.8164 |
| creatinine | rs75459462  | Sinnott-Armstrong et al. (2021) | A  | 3 x 10 <sup>-28</sup> | 0.042 unit increase   | [0.035-0.049]   | DAB2, C9         | A | -0.0381 | 0.1654 | 0.8179 |
| creatinine | rs780094    | Sinnott-Armstrong et al. (2021) | C  | 8 x 10 <sup>-75</sup> | 0.0449 unit increase  | [0.04-0.05]     | '-               | T | 0.0232  | 0.1009 | 0.8186 |
| creatinine | rs10874312  | Gorski et al. (2017)            | A  | 2 x 10 <sup>-8</sup>  | 0.0057 unit decrease  | [0.0035-0.0079] | '-               | G | 0.0216  | 0.0960 | 0.8220 |
| creatinine | rs10178675  | Sinnott-Armstrong et al. (2021) | G  | 6 x 10 <sup>-10</sup> | 0.0224 unit decrease  | [0.015-0.029]   | UNC80            | G | -0.0331 | 0.1537 | 0.8299 |
| creatinine | rs67523949  | Graham et al. (2019)            | T  | 2 x 10 <sup>-8</sup>  | 0.03473 unit increase | [0.024-0.046]   | SLC6A13          | C | -0.0223 | 0.1041 | 0.8303 |
| creatinine | rs932046    | Sinnott-Armstrong et al. (2021) | T  | 4 x 10 <sup>-15</sup> | 0.0669 unit increase  | [0.05-0.084]    | RN7SL278P, RCN2  | C | 0.0650  | 0.3033 | 0.8306 |
| creatinine | rs13298297  | Gorski et al. (2017)            | A  | 2 x 10 <sup>-8</sup>  | 0.0075 unit decrease  | [0.0048-0.0102] | ASTN2            | A | -0.0231 | 0.1083 | 0.8316 |
| creatinine | rs2789047   | Van Driest et al. (2015)        | A  | 1 x 10 <sup>-7</sup>  | 0.053 unit decrease   | [0.033-0.073]   | COX6A1P3         | A | 0.0242  | 0.1137 | 0.8318 |
| creatinine | rs10518732  | Kanai et al. (2018)             | NR | 3 x 10 <sup>-34</sup> | 0.0452 unit decrease  | [0.038-0.052]   | WDR72            | C | 0.0255  | 0.1204 | 0.8329 |
| creatinine | rs75834729  | Kanai et al. (2018)             | NR | 2 x 10 <sup>-9</sup>  | 0.02413 unit decrease | [0.016-0.032]   | CCDC26           | T | 0.0445  | 0.2123 | 0.8343 |
| creatinine | rs7121082   | Sinnott-Armstrong et al. (2021) | A  | 2 x 10 <sup>-12</sup> | 0.0221 unit decrease  | [0.016-0.028]   | OR52H2P, OR52B5P | A | 0.0270  | 0.1303 | 0.8361 |
| creatinine | rs78844280  | Sinnott-Armstrong et al. (2021) | A  | 2 x 10 <sup>-11</sup> | 0.0549 unit increase  | [0.039-0.071]   | '-               | A | 0.0676  | 0.3286 | 0.8372 |
| creatinine | rs115671087 | Sinnott-Armstrong et al. (2021) | A  | 2 x 10 <sup>-10</sup> | 0.0403 unit increase  | [0.028-0.053]   | CCDC158          | A | -0.0576 | 0.2814 | 0.8381 |
| creatinine | rs7177266   | Kanai et al. (2018)             | NR | 1 x 10 <sup>-11</sup> | 0.02833 unit increase | [0.02-0.037]    | UBE2Q2, FBXO22   | C | -0.0208 | 0.1024 | 0.8392 |
| creatinine | rs72668656  | Sinnott-Armstrong et al. (2021) | A  | 3 x 10 <sup>-12</sup> | 0.0197 unit decrease  | [0.014-0.025]   | LINC02428        | A | -0.0238 | 0.1170 | 0.8394 |
| creatinine | rs9945268   | Pattaro et al. (2016)           | A  | 3 x 10 <sup>-6</sup>  | 0.0042 unit decrease  | [0.0024-0.006]  | LINC01544        | T | -0.0236 | 0.1172 | 0.8406 |
| creatinine | rs1050274   | Sinnott-Armstrong et al. (2021) | A  | 2 x 10 <sup>-20</sup> | 0.0237 unit increase  | [0.019-0.029]   | KNG1             | A | -0.0200 | 0.1014 | 0.8437 |
| creatinine | rs41310885  | Sinnott-Armstrong et al. (2021) | A  | 3 x 10 <sup>-19</sup> | 0.0417 unit decrease  | [0.032-0.051]   | MINDY1           | A | -0.0399 | 0.2040 | 0.8452 |
| creatinine | rs757608    | Sinnott-Armstrong et al. (2021) | G  | 3 x 10 <sup>-27</sup> | 0.0273 unit decrease  | [0.022-0.032]   | TBX4, LINC02875  | A | -0.0205 | 0.1068 | 0.8479 |

|            |            |                                 |    |            |                        |                 |                 |   |         |        |        |
|------------|------------|---------------------------------|----|------------|------------------------|-----------------|-----------------|---|---------|--------|--------|
| creatinine | rs13329952 | Pattaro et al. (2016)           | T  | 9 x 10-43  | 0.0158 unit decrease   | [0.014-0.018]   | UMOD            | C | -0.0221 | 0.1181 | 0.8518 |
| creatinine | rs79972752 | Sinnott-Armstrong et al. (2021) | T  | 4 x 10-20  | 0.0398 unit decrease   | [0.031-0.048]   | UBE2Q2, DNM1P49 | T | 0.0307  | 0.1641 | 0.8519 |
| creatinine | rs2585431  | Sinnott-Armstrong et al. (2021) | C  | 2 x 10-10  | 0.0165 unit increase   | [0.011-0.022]   | CYP24A1         | T | -0.0179 | 0.0965 | 0.8530 |
| creatinine | rs2762943  | Graham et al. (2019)            | G  | 1 x 10-8   | 0.065065 unit increase | [0.045-0.085]   | PFDN4, CYP24A1  | T | 0.0340  | 0.1895 | 0.8578 |
| creatinine | rs2762943  | Sinnott-Armstrong et al. (2021) | G  | 4 x 10-17  | 0.0382 unit increase   | [0.029-0.047]   | PFDN4, CYP24A1  | T | 0.0340  | 0.1895 | 0.8578 |
| creatinine | rs7247977  | Gorski et al. (2017)            | T  | 2 x 10-12  | 0.007 unit decrease    | [0.0052-0.0088] | SLC7A9          | C | 0.0186  | 0.1041 | 0.8582 |
| creatinine | rs7247977  | Kanai et al. (2018)             | NR | 1 x 10-8   | 0.02202 unit decrease  | [0.014-0.03]    | SLC7A9          | C | 0.0186  | 0.1041 | 0.8582 |
| creatinine | rs7805747  | Pattaro et al. (2016)           | A  | 8 x 10-29  | 0.013 unit decrease    | [0.011-0.015]   | PRKAG2          | A | -0.0205 | 0.1162 | 0.8605 |
| creatinine | rs7805747  | Pattaro et al. (2016)           | A  | 2 x 10-29  | 0.0136 unit decrease   | [0.011-0.016]   | PRKAG2          | A | -0.0205 | 0.1162 | 0.8605 |
| creatinine | rs7805747  | Sinnott-Armstrong et al. (2021) | A  | 6 x 10-122 | 0.0626 unit increase   | [0.057-0.068]   | PRKAG2          | A | -0.0205 | 0.1162 | 0.8605 |
| creatinine | rs79604958 | Sinnott-Armstrong et al. (2021) | C  | 6 x 10-10  | 0.0324 unit increase   | [0.022-0.043]   | IMP3, SNUPN     | C | -0.0367 | 0.2114 | 0.8624 |
| creatinine | rs4371638  | Sinnott-Armstrong et al. (2021) | C  | 4 x 10-24  | 0.0255 unit decrease   | [0.021-0.03]    | SHROOM3         | T | -0.0168 | 0.0975 | 0.8634 |
| creatinine | rs34823813 | Sinnott-Armstrong et al. (2021) | A  | 2 x 10-13  | 0.0292 unit decrease   | [0.021-0.037]   | RNF123          | A | -0.0276 | 0.1613 | 0.8641 |
| creatinine | rs16856823 | Kanai et al. (2018)             | NR | 3 x 10-25  | 0.04923 unit decrease  | [0.04-0.059]    | LRP2            | T | -0.0661 | 0.3917 | 0.8661 |
| creatinine | rs11120093 | Sinnott-Armstrong et al. (2021) | T  | 8 x 10-15  | 0.0189 unit increase   | [0.014-0.024]   | PFKFB2          | T | -0.0164 | 0.0979 | 0.8673 |
| creatinine | rs79309321 | Sinnott-Armstrong et al. (2021) | G  | 1 x 10-9   | 0.0398 unit decrease   | [0.027-0.053]   | TFDP2           | G | 0.0395  | 0.2433 | 0.8713 |
| creatinine | rs2352039  | Stafford-Smith et al. (2015)    | A  | 2 x 10-6   | 8.9 unit increase      | [5.2-12.6]      | PTGFR, MGC27382 | T | -0.0220 | 0.1357 | 0.8716 |
| creatinine | rs11062167 | Gorski et al. (2017)            | A  | 1 x 10-8   | 0.0055 unit decrease   | [0.0037-0.0073] | SLC6A13         | G | -0.0166 | 0.1031 | 0.8725 |
| creatinine | rs10491967 | Pattaro et al. (2016)           | A  | 5 x 10-14  | 0.0095 unit decrease   | [0.007-0.012]   | TSPAN9          | A | -0.0271 | 0.1686 | 0.8725 |
| creatinine | rs77924615 | Gorski et al. (2017)            | A  | 5 x 10-40  | 0.0176 unit increase   | [0.015-0.02]    | PDILT           | A | -0.0198 | 0.1258 | 0.8750 |

|            |             |                                 |    |                       |                        |                 |                     |   |         |        |        |
|------------|-------------|---------------------------------|----|-----------------------|------------------------|-----------------|---------------------|---|---------|--------|--------|
| creatinine | rs77924615  | Graham et al. (2019)            | A  | 2 x 10 <sup>-16</sup> | 0.06473 unit decrease  | [0.051-0.079]   | PDILT               | A | -0.0198 | 0.1258 | 0.8750 |
| creatinine | rs77924615  | Kanai et al. (2018)             | NR | 2 x 10 <sup>-53</sup> | 0.06802 unit decrease  | [0.059-0.077]   | PDILT               | A | -0.0198 | 0.1258 | 0.8750 |
| creatinine | rs66464034  | Sinnott-Armstrong et al. (2021) | G  | 8 x 10 <sup>-14</sup> | 0.0274 unit decrease   | [0.02-0.035]    | ADAMTSL4-AS2, FALEC | G | 0.0238  | 0.1513 | 0.8751 |
| creatinine | rs112068790 | Sinnott-Armstrong et al. (2021) | C  | 4 x 10 <sup>-15</sup> | 0.0556 unit decrease   | [0.042-0.07]    | SPEG                | C | -0.0436 | 0.2837 | 0.8780 |
| creatinine | rs8101881   | Graham et al. (2019)            | T  | 1 x 10 <sup>-12</sup> | 0.045327 unit increase | [0.034-0.057]   | SLC7A9, CEP89       | C | 0.0160  | 0.1043 | 0.8785 |
| creatinine | rs35259333  | Sinnott-Armstrong et al. (2021) | G  | 3 x 10 <sup>-11</sup> | 0.0455 unit increase   | [0.032-0.059]   | TNK2                | G | 0.0465  | 0.3056 | 0.8791 |
| creatinine | rs10254101  | Gorski et al. (2017)            | T  | 6 x 10 <sup>-20</sup> | 0.0104 unit decrease   | [0.0082-0.0126] | PRKAG2              | T | -0.0175 | 0.1147 | 0.8792 |
| creatinine | rs73488277  | Sinnott-Armstrong et al. (2021) | T  | 5 x 10 <sup>-13</sup> | 0.0254 unit increase   | [0.019-0.032]   | SHH                 | T | -0.0207 | 0.1378 | 0.8807 |
| creatinine | rs16940897  | Sinnott-Armstrong et al. (2021) | T  | 4 x 10 <sup>-10</sup> | 0.0275 unit increase   | [0.019-0.036]   | SLC28A2, H3P39      | T | -0.0276 | 0.1847 | 0.8813 |
| creatinine | rs17050272  | Pattaro et al. (2016)           | A  | 1 x 10 <sup>-7</sup>  | 0.0043 unit decrease   | [0.0027-0.0059] | LINC01101           | A | -0.0149 | 0.1003 | 0.8823 |
| creatinine | rs2712184   | Pattaro et al. (2016)           | A  | 1 x 10 <sup>-10</sup> | 0.0053 unit decrease   | [NR]            | FABP5P14, TNP1      | C | 0.0148  | 0.1037 | 0.8864 |
| creatinine | rs6119593   | Sinnott-Armstrong et al. (2021) | A  | 2 x 10 <sup>-11</sup> | 0.0228 unit increase   | [0.016-0.029]   | MMP24, MMP24OS      | A | -0.0196 | 0.1390 | 0.8879 |
| creatinine | rs3731909   | Sinnott-Armstrong et al. (2021) | G  | 3 x 10 <sup>-21</sup> | 0.0234 unit increase   | [0.018-0.028]   | ASIC4, ASIC4-AS1    | C | 0.0148  | 0.1052 | 0.8882 |
| creatinine | rs1533988   | Kanai et al. (2018)             | NR | 1 x 10 <sup>-37</sup> | 0.0572 unit increase   | [0.048-0.066]   | UNCX                | A | 0.0174  | 0.1251 | 0.8894 |
| creatinine | rs10479001  | Sinnott-Armstrong et al. (2021) | T  | 3 x 10 <sup>-10</sup> | 0.0367 unit increase   | [0.025-0.048]   | PDLIM4, P4HA2       | T | 0.0339  | 0.2443 | 0.8898 |
| creatinine | rs6715026   | Sinnott-Armstrong et al. (2021) | C  | 5 x 10 <sup>-11</sup> | 0.0164 unit increase   | [0.012-0.021]   | '-                  | C | -0.0155 | 0.1122 | 0.8903 |
| creatinine | rs17206198  | Sinnott-Armstrong et al. (2021) | G  | 3 x 10 <sup>-15</sup> | 0.0273 unit decrease   | [0.02-0.034]    | TDRD12              | G | -0.0178 | 0.1292 | 0.8908 |
| creatinine | rs2453533   | Köttgen et al. (2010)           | NR | 5 x 10 <sup>-22</sup> | NR                     | NR              | SLC28A2, RNU6-953P  | A | -0.0135 | 0.1014 | 0.8943 |
| creatinine | rs2453533   | Gorski et al. (2017)            | A  | 3 x 10 <sup>-43</sup> | 0.0135 unit decrease   | [0.012-0.015]   | SLC28A2, RNU6-953P  | A | -0.0135 | 0.1014 | 0.8943 |
| creatinine | rs2453533   | Pattaro et al. (2016)           | A  | 5 x 10 <sup>-41</sup> | 0.0125 unit decrease   | [0.011-0.014]   | SLC28A2, RNU6-953P  | A | -0.0135 | 0.1014 | 0.8943 |

|            |             |                                 |    |                        |                         |                 |                  |   |         |        |        |
|------------|-------------|---------------------------------|----|------------------------|-------------------------|-----------------|------------------|---|---------|--------|--------|
| creatinine | rs2541381   | Gorski et al. (2017)            | NR | 2 x 10 <sup>-6</sup>   | NR                      | NR              | FABP5P14, TNP1   | G | -0.0129 | 0.1019 | 0.8990 |
| creatinine | rs7764488   | Gorski et al. (2017)            | A  | 4 x 10 <sup>-9</sup>   | 0.0061 unit increase    | [0.0039-0.0083] | EYA4             | A | -0.0132 | 0.1049 | 0.9001 |
| creatinine | rs17380173  | Rhee et al. (2013)              | NR | 2 x 10 <sup>-7</sup>   | 0.5900155 unit decrease | [0.37-0.81]     | Y_RNA            | T | 0.0223  | 0.1790 | 0.9009 |
| creatinine | rs6676197   | Sinnott-Armstrong et al. (2021) | G  | 2 x 10 <sup>-9</sup>   | 0.0143 unit decrease    | [0.0096-0.019]  | RTCA, CDC14A     | A | -0.0116 | 0.0951 | 0.9030 |
| creatinine | rs12917707  | Pattaro et al. (2016)           | T  | 2 x 10 <sup>-8</sup>   | 0.0266 unit increase    | [NR]            | PDILT, UMOD      | T | -0.0145 | 0.1212 | 0.9051 |
| creatinine | rs12917707  | Köttgen et al. (2010)           | T  | 1 x 10 <sup>-20</sup>  | NR                      | NR              | PDILT, UMOD      | T | -0.0145 | 0.1212 | 0.9051 |
| creatinine | rs12917707  | Sinnott-Armstrong et al. (2021) | T  | 6 x 10 <sup>-130</sup> | 0.0757 unit decrease    | [0.07-0.082]    | PDILT, UMOD      | T | -0.0145 | 0.1212 | 0.9051 |
| creatinine | rs12917707  | Pattaro et al. (2016)           | T  | 5 x 10 <sup>-36</sup>  | 0.0152 unit increase    | [0.013-0.018]   | PDILT, UMOD      | T | -0.0145 | 0.1212 | 0.9051 |
| creatinine | rs35050898  | Sinnott-Armstrong et al. (2021) | T  | 6 x 10 <sup>-10</sup>  | 0.0247 unit increase    | [0.017-0.033]   | UBBP1            | T | -0.0177 | 0.1523 | 0.9076 |
| creatinine | rs111239279 | Sinnott-Armstrong et al. (2021) | C  | 3 x 10 <sup>-23</sup>  | 0.0907 unit decrease    | [0.073-0.109]   | SHH              | C | 0.0638  | 0.5953 | 0.9147 |
| creatinine | rs61882193  | Sinnott-Armstrong et al. (2021) | G  | 1 x 10 <sup>-10</sup>  | 0.0206 unit decrease    | [0.014-0.027]   | LINC02747, MYEOV | G | -0.0143 | 0.1342 | 0.9154 |
| creatinine | rs55873331  | Sinnott-Armstrong et al. (2021) | T  | 3 x 10 <sup>-13</sup>  | 0.029 unit decrease     | [0.021-0.037]   | BSN              | T | -0.0172 | 0.1646 | 0.9170 |
| creatinine | rs17060430  | Sinnott-Armstrong et al. (2021) | A  | 4 x 10 <sup>-13</sup>  | 0.052 unit increase     | [0.038-0.066]   | MED23            | A | 0.0272  | 0.2652 | 0.9185 |
| creatinine | rs3777808   | Rhee et al. (2013)              | NR | 5 x 10 <sup>-7</sup>   | 0.5263731 unit decrease | [0.32-0.73]     | EYA4             | A | 0.0291  | 0.2892 | 0.9201 |
| creatinine | rs78343805  | Sinnott-Armstrong et al. (2021) | T  | 2 x 10 <sup>-9</sup>   | 0.0382 unit decrease    | [0.026-0.051]   | UNQ6494          | T | 0.0284  | 0.2836 | 0.9203 |
| creatinine | rs3118089   | Sinnott-Armstrong et al. (2021) | T  | 8 x 10 <sup>-11</sup>  | 0.0395 unit increase    | [0.028-0.051]   | DLEU1            | T | 0.0260  | 0.2629 | 0.9214 |
| creatinine | rs35304341  | Sinnott-Armstrong et al. (2021) | A  | 7 x 10 <sup>-17</sup>  | 0.035 unit decrease     | [0.027-0.043]   | KIF21B           | A | 0.0157  | 0.1674 | 0.9253 |
| creatinine | rs17643040  | Sinnott-Armstrong et al. (2021) | C  | 6 x 10 <sup>-10</sup>  | 0.0208 unit decrease    | [0.014-0.027]   | EYA4, TARID      | C | -0.0130 | 0.1471 | 0.9299 |
| creatinine | rs13156373  | Sinnott-Armstrong et al. (2021) | C  | 4 x 10 <sup>-9</sup>   | 0.0284 unit increase    | [0.019-0.038]   | ARL~†15.00       | C | 0.0167  | 0.1934 | 0.9312 |
| creatinine | rs1326122   | Sinnott-Armstrong et al. (2021) | A  | 4 x 10 <sup>-18</sup>  | 0.073 unit increase     | [0.057-0.089]   | DLEU1            | A | 0.0280  | 0.3303 | 0.9325 |

|            |            |                                 |    |                       |                       |                 |              |   |         |        |        |
|------------|------------|---------------------------------|----|-----------------------|-----------------------|-----------------|--------------|---|---------|--------|--------|
| creatinine | rs2511162  | Kanai et al. (2018)             | NR | 2 x 10 <sup>-8</sup>  | 0.02077 unit decrease | [0.014-0.028]   | GAB2         | G | -0.0125 | 0.1486 | 0.9330 |
| creatinine | rs79168752 | Sinnott-Armstrong et al. (2021) | T  | 4 x 10 <sup>-10</sup> | 0.0244 unit increase  | [0.017-0.032]   | E2F3         | T | -0.0133 | 0.1591 | 0.9334 |
| creatinine | rs2237886  | Sinnott-Armstrong et al. (2021) | T  | 4 x 10 <sup>-11</sup> | 0.0259 unit decrease  | [0.018-0.034]   | KCNQ1        | T | 0.0122  | 0.1467 | 0.9340 |
| creatinine | rs11657044 | Pattaro et al. (2016)           | T  | 8 x 10 <sup>-22</sup> | 0.0115 unit decrease  | [0.0091-0.0139] | BCAS3        | T | 0.0106  | 0.1305 | 0.9353 |
| creatinine | rs151246   | Kanai et al. (2018)             | NR | 9 x 10 <sup>-8</sup>  | 0.02169 unit decrease | [0.014-0.03]    | AQP4-AS1     | T | -0.0095 | 0.1195 | 0.9369 |
| creatinine | rs12724682 | Sinnott-Armstrong et al. (2021) | C  | 7 x 10 <sup>-46</sup> | 0.0511 unit increase  | [0.044-0.058]   | PPM1J        | C | 0.0111  | 0.1549 | 0.9427 |
| creatinine | rs62204326 | Sinnott-Armstrong et al. (2021) | T  | 2 x 10 <sup>-9</sup>  | 0.0227 unit decrease  | [0.015-0.03]    | TAF4, LSM14B | T | -0.0111 | 0.1552 | 0.9433 |
| creatinine | rs4751107  | Sinnott-Armstrong et al. (2021) | T  | 5 x 10 <sup>-10</sup> | 0.0166 unit decrease  | [0.011-0.022]   | MGMT         | T | 0.0080  | 0.1117 | 0.9433 |
| creatinine | rs4987719  | Sinnott-Armstrong et al. (2021) | T  | 1 x 10 <sup>-9</sup>  | 0.0407 unit increase  | [0.028-0.054]   | BCL2         | T | -0.0193 | 0.2797 | 0.9451 |
| creatinine | rs12358805 | Sinnott-Armstrong et al. (2021) | C  | 1 x 10 <sup>-11</sup> | 0.0166 unit decrease  | [0.012-0.021]   | MYPN         | T | -0.0068 | 0.1050 | 0.9488 |
| creatinine | rs79782229 | Sinnott-Armstrong et al. (2021) | G  | 1 x 10 <sup>-17</sup> | 0.0379 unit increase  | [0.029-0.047]   | '-           | G | 0.0112  | 0.1746 | 0.9489 |
| creatinine | rs76026733 | Sinnott-Armstrong et al. (2021) | C  | 5 x 10 <sup>-24</sup> | 0.0541 unit decrease  | [0.044-0.065]   | ARL-†15.00   | C | -0.0153 | 0.2410 | 0.9494 |
| creatinine | rs1132179  | Sinnott-Armstrong et al. (2021) | G  | 5 x 10 <sup>-26</sup> | 0.0542 unit increase  | [0.044-0.064]   | TBX2-AS1     | G | 0.0144  | 0.2277 | 0.9496 |
| creatinine | rs12460876 | Pattaro et al. (2016)           | T  | 2 x 10 <sup>-13</sup> | 0.0066 unit decrease  | [0.0048-0.0084] | SLC7A9       | C | 0.0066  | 0.1048 | 0.9500 |
| creatinine | rs12460876 | Köttgen et al. (2010)           | C  | 3 x 10 <sup>-15</sup> | 0.01 unit increase    | [0.006-0.01]    | SLC7A9       | C | 0.0066  | 0.1048 | 0.9500 |
| creatinine | rs12460876 | Pattaro et al. (2016)           | T  | 3 x 10 <sup>-12</sup> | 0.0065 unit decrease  | [0.0047-0.0083] | SLC7A9       | C | 0.0066  | 0.1048 | 0.9500 |
| creatinine | rs11115002 | Sinnott-Armstrong et al. (2021) | T  | 2 x 10 <sup>-9</sup>  | 0.0167 unit increase  | [0.011-0.022]   | PPFIA2       | T | -0.0068 | 0.1144 | 0.9527 |
| creatinine | rs9529913  | Gorski et al. (2017)            | T  | 3 x 10 <sup>-11</sup> | 0.0066 unit decrease  | [0.0048-0.0084] | DACH1        | C | -0.0061 | 0.1044 | 0.9536 |
| creatinine | rs662138   | Sinnott-Armstrong et al. (2021) | G  | 5 x 10 <sup>-24</sup> | 0.031 unit decrease   | [0.025-0.037]   | SLC22A1      | G | 0.0074  | 0.1340 | 0.9560 |
| creatinine | rs7971845  | Kanai et al. (2018)             | NR | 3 x 10 <sup>-9</sup>  | 0.02743 unit decrease | [0.018-0.036]   | '-           | G | -0.0062 | 0.1202 | 0.9591 |



|            |             |                                 |    |                       |                        |                 |                 |   |         |        |        |
|------------|-------------|---------------------------------|----|-----------------------|------------------------|-----------------|-----------------|---|---------|--------|--------|
| creatinine | rs6465825   | Köttgen et al. (2010)           | C  | 2 x 10 <sup>-9</sup>  | 0.01 unit decrease     | [0.006-0.01]    | RSBN1L, TMEM60  | C | 0.0046  | 0.0968 | 0.9620 |
| creatinine | rs6465825   | Pattaro et al. (2016)           | T  | 5 x 10 <sup>-11</sup> | 0.0061 unit increase   | [0.0043-0.0079] | RSBN1L, TMEM60  | C | 0.0046  | 0.0968 | 0.9620 |
| creatinine | rs1728918   | Graham et al. (2019)            | G  | 2 x 10 <sup>-12</sup> | 0.052956 unit increase | [0.039-0.066]   | PPM1G, NRBP1    | A | 0.0052  | 0.1108 | 0.9629 |
| creatinine | rs4957473   | Sinnott-Armstrong et al. (2021) | G  | 5 x 10 <sup>-24</sup> | 0.0247 unit decrease   | [0.02-0.029]    | C9              | G | -0.0044 | 0.1038 | 0.9659 |
| creatinine | rs72724253  | Sinnott-Armstrong et al. (2021) | T  | 7 x 10 <sup>-11</sup> | 0.0242 unit decrease   | [0.017-0.031]   | DUOX1           | T | -0.0065 | 0.1566 | 0.9670 |
| creatinine | rs11180732  | Pattaro et al. (2016)           | T  | 6 x 10 <sup>-7</sup>  | 0.0041 unit increase   | [0.0025-0.0057] | RN7SL734P       | T | -0.0042 | 0.1015 | 0.9670 |
| creatinine | rs17839577  | Sinnott-Armstrong et al. (2021) | T  | 2 x 10 <sup>-10</sup> | 0.048 unit increase    | [0.033-0.063]   | '-              | T | 0.0121  | 0.2930 | 0.9671 |
| creatinine | rs10262995  | Stafford-Smith et al. (2015)    | A  | 2 x 10 <sup>-7</sup>  | 12.84 unit increase    | [7.98-17.7]     | BBS9            | T | -0.0064 | 0.1578 | 0.9678 |
| creatinine | rs4848698   | Sinnott-Armstrong et al. (2021) | T  | 2 x 10 <sup>-16</sup> | 0.0262 unit increase   | [0.02-0.032]    | TFCP2L1         | C | -0.0051 | 0.1329 | 0.9697 |
| creatinine | rs10418932  | Sinnott-Armstrong et al. (2021) | C  | 3 x 10 <sup>-10</sup> | 0.0208 unit increase   | [0.014-0.027]   | RNU6-945P, AKT2 | C | 0.0054  | 0.1438 | 0.9701 |
| creatinine | rs111932172 | Sinnott-Armstrong et al. (2021) | T  | 6 x 10 <sup>-12</sup> | 0.0394 unit decrease   | [0.028-0.051]   | BCAS3           | T | 0.0078  | 0.2228 | 0.9722 |
| creatinine | rs793842    | Sinnott-Armstrong et al. (2021) | C  | 5 x 10 <sup>-9</sup>  | 0.0143 unit decrease   | [0.0096-0.019]  | DCDC2           | T | -0.0033 | 0.0986 | 0.9732 |
| creatinine | rs8091180   | Pattaro et al. (2016)           | A  | 1 x 10 <sup>-9</sup>  | 0.006 unit decrease    | [NR]            | NFATC1          | G | -0.0031 | 0.0963 | 0.9746 |
| creatinine | rs11703324  | Sinnott-Armstrong et al. (2021) | A  | 8 x 10 <sup>-10</sup> | 0.0296 unit increase   | [0.02-0.039]    | TNRC6B          | A | -0.0058 | 0.1874 | 0.9753 |
| creatinine | rs4715491   | Kanai et al. (2018)             | NR | 5 x 10 <sup>-13</sup> | 0.03202 unit increase  | [0.023-0.041]   | FAM83B          | G | 0.0034  | 0.1147 | 0.9765 |
| creatinine | rs711818    | Sinnott-Armstrong et al. (2021) | G  | 1 x 10 <sup>-18</sup> | 0.0238 unit increase   | [0.019-0.029]   | HOXD10          | G | -0.0032 | 0.1166 | 0.9778 |
| creatinine | rs62027653  | Sinnott-Armstrong et al. (2021) | G  | 2 x 10 <sup>-14</sup> | 0.0398 unit increase   | [0.03-0.05]     | TMEM266         | G | 0.0055  | 0.2024 | 0.9782 |
| creatinine | rs163160    | Pattaro et al. (2016)           | A  | 2 x 10 <sup>-9</sup>  | 0.0065 unit increase   | [NR]            | KCNQ1           | G | -0.0034 | 0.1341 | 0.9796 |
| creatinine | rs233438    | Sinnott-Armstrong et al. (2021) | A  | 1 x 10 <sup>-18</sup> | 0.0272 unit decrease   | [0.021-0.033]   | KCNQ1           | G | -0.0034 | 0.1341 | 0.9796 |
| creatinine | rs116960885 | Sinnott-Armstrong et al. (2021) | C  | 2 x 10 <sup>-10</sup> | 0.0803 unit increase   | [0.056-0.105]   | TBX4, LINC02875 | C | -0.0092 | 0.4594 | 0.9840 |

|            |             |                                 |    |                       |                       |                 |                  |   |         |        |        |
|------------|-------------|---------------------------------|----|-----------------------|-----------------------|-----------------|------------------|---|---------|--------|--------|
| creatinine | rs16966245  | Sinnott-Armstrong et al. (2021) | C  | 4 x 10 <sup>-24</sup> | 0.0247 unit increase  | [0.02-0.029]    | WDR72            | C | 0.0021  | 0.1033 | 0.9841 |
| creatinine | rs117392811 | Sinnott-Armstrong et al. (2021) | G  | 2 x 10 <sup>-26</sup> | 0.0821 unit decrease  | [0.067-0.097]   | FBXO22           | G | 0.0055  | 0.3095 | 0.9857 |
| creatinine | rs67551338  | Gorski et al. (2017)            | T  | 2 x 10 <sup>-9</sup>  | 0.0124 unit decrease  | [0.0085-0.0163] | TSPAN9           | T | 0.0031  | 0.1887 | 0.9868 |
| creatinine | rs7802256   | Sinnott-Armstrong et al. (2021) | T  | 1 x 10 <sup>-11</sup> | 0.0245 unit increase  | [0.017-0.032]   | RP9, NT5C3A      | T | -0.0019 | 0.1464 | 0.9895 |
| creatinine | rs10459012  | Kanai et al. (2018)             | NR | 1 x 10 <sup>-8</sup>  | 0.02215 unit increase | [0.015-0.03]    | OR4A12P, OR4A11P | A | 0.0016  | 0.1491 | 0.9917 |
| creatinine | rs35985639  | Kanai et al. (2018)             | NR | 1 x 10 <sup>-8</sup>  | 0.02412 unit decrease | [0.016-0.032]   | TFEB             | A | -0.0005 | 0.1461 | 0.9971 |
| creatinine | rs72830456  | Sinnott-Armstrong et al. (2021) | A  | 3 x 10 <sup>-9</sup>  | 0.0284 unit increase  | [0.019-0.038]   | MXI1             | A | -0.0006 | 0.1966 | 0.9974 |
| creatinine | rs11557154  | Sinnott-Armstrong et al. (2021) | T  | 1 x 10 <sup>-10</sup> | 0.023 unit decrease   | [0.016-0.03]    | DCAF12           | T | -0.0003 | 0.1394 | 0.9984 |

**Supplementary Table S8.** Studies included for metabolite GWAS replication.

| Reference                       | Metabolites                     |
|---------------------------------|---------------------------------|
| Chambers et al. (2010)          | Creatinine                      |
| Demirkan et al. (2015)          | 3-hydroxybutyrate               |
| Gorski et al. (2017)            | Creatinine                      |
| Graham et al. (2019)            | Creatinine                      |
| Hishida et al. (2018)           | Creatinine                      |
| Kanai et al. (2018)             | Creatinine                      |
| Köttgen et al. (2010)           | Creatinine                      |
| Nagy et al. (2017)              | Creatinine                      |
| Pattaro et al. (2016)           | Creatinine                      |
| Rhee et al. (2013)              | Creatinine                      |
| Richardson et al. (2022)        | 3-hydroxybutyrate, acetoacetate |
| Sinnott-Armstrong et al. (2021) | Creatinine                      |
| Smith et al. (2022)             | 3-hydroxybutyrate, acetoacetate |
| Stafford-Smith et al. (2015)    | Creatinine                      |
| Van Driest et al. (2015)        | Creatinine                      |
| Williams et al. (2016)          | Creatinine                      |
| Yasukochi et al. (2018)         | Creatinine                      |

**Supplementary Table S9.** Metabolite and clinical variable logistic regression (for 28- and 90-day mortality, Dialysis, RRT post and RRT prior randomisation) and linear regression (for APACHE II) results with no covariates.

| Metabolite        | Outcome          | Effect  | SE     | Stat    | p-value |
|-------------------|------------------|---------|--------|---------|---------|
| 3-hydroxybutyrate | 28-day mortality | 0.0022  | 0.0048 | 0.4570  | 0.6477  |
| 3-hydroxybutyrate | 90-day mortality | 0.0006  | 0.0047 | 0.1263  | 0.8995  |
| 3-hydroxybutyrate | Dialysis         | -0.0106 | 0.0265 | -0.4000 | 0.6891  |
| 3-hydroxybutyrate | RRT post         | 0.0027  | 0.0047 | 0.5685  | 0.5697  |
| 3-hydroxybutyrate | RRT prior        | 0.0048  | 0.0063 | 0.7675  | 0.4428  |
| 3-hydroxybutyrate | APACHE II        | -0.0062 | 0.0159 | -0.3880 | 0.6985  |
| Acetate           | 28-day mortality | 0.1939  | 0.1315 | 1.4744  | 0.1404  |
| Acetate           | 90-day mortality | 0.2191  | 0.1378 | 1.5899  | 0.1119  |
| Acetate           | Dialysis         | 0.0143  | 0.4315 | 0.0332  | 0.9735  |
| Acetate           | RRT post         | 0.3893  | 0.1562 | 2.4923  | 0.0127  |
| Acetate           | RRT prior        | 0.5464  | 0.1787 | 3.0583  | 0.0022  |
| Acetate           | APACHE II        | 0.7928  | 0.4186 | 1.8942  | 0.0596  |
| Acetoacetate      | 28-day mortality | 0.0082  | 0.0130 | 0.6328  | 0.5269  |
| Acetoacetate      | 90-day mortality | 0.0092  | 0.0129 | 0.7143  | 0.4750  |
| Acetoacetate      | Dialysis         | 0.0058  | 0.0379 | 0.1541  | 0.8776  |
| Acetoacetate      | RRT post         | 0.0032  | 0.0131 | 0.2416  | 0.8091  |
| Acetoacetate      | RRT prior        | 0.0054  | 0.0190 | 0.2832  | 0.7770  |
| Acetoacetate      | APACHE II        | -0.0218 | 0.0436 | -0.4994 | 0.6180  |
| Acetone           | 28-day mortality | -0.0041 | 0.0077 | -0.5300 | 0.5961  |
| Acetone           | 90-day mortality | -0.0029 | 0.0069 | -0.4183 | 0.6758  |
| Acetone           | Dialysis         | -0.0300 | 0.0600 | -0.5010 | 0.6164  |
| Acetone           | RRT post         | -0.0055 | 0.0080 | -0.6881 | 0.4914  |
| Acetone           | RRT prior        | -0.0046 | 0.0139 | -0.3296 | 0.7417  |
| Acetone           | APACHE II        | 0.0049  | 0.0224 | 0.2173  | 0.8281  |
| Alanine           | 28-day mortality | 0.0283  | 0.0148 | 1.9156  | 0.0554  |
| Alanine           | 90-day mortality | 0.0206  | 0.0145 | 1.4221  | 0.1550  |
| Alanine           | Dialysis         | 0.0005  | 0.0529 | 0.0102  | 0.9919  |
| Alanine           | RRT post         | 0.0415  | 0.0155 | 2.6805  | 0.0074  |
| Alanine           | RRT prior        | 0.0656  | 0.0189 | 3.4764  | 0.0005  |
| Alanine           | APACHE II        | 0.0741  | 0.0483 | 1.5330  | 0.1267  |
| Citrate           | 28-day mortality | 0.0554  | 0.0359 | 1.5443  | 0.1225  |
| Citrate           | 90-day mortality | 0.0493  | 0.0361 | 1.3660  | 0.1719  |
| Citrate           | Dialysis         | 0.0257  | 0.1161 | 0.2216  | 0.8247  |

|              |                  |         |        |         |        |
|--------------|------------------|---------|--------|---------|--------|
| Citrate      | RRT post         | 0.1654  | 0.0486 | 3.4059  | 0.0007 |
| Citrate      | RRT prior        | 0.2145  | 0.0544 | 3.9440  | 0.0001 |
| Citrate      | APACHE II        | 0.1915  | 0.1149 | 1.6672  | 0.0971 |
| Creatine     | 28-day mortality | 0.0415  | 0.0190 | 2.1813  | 0.0292 |
| Creatine     | 90-day mortality | 0.0204  | 0.0175 | 1.1665  | 0.2434 |
| Creatine     | Dialysis         | -0.0935 | 0.1537 | -0.6085 | 0.5428 |
| Creatine     | RRT post         | 0.0259  | 0.0176 | 1.4733  | 0.1407 |
| Creatine     | RRT prior        | 0.0503  | 0.0203 | 2.4804  | 0.0131 |
| Creatine     | APACHE II        | 0.0697  | 0.0579 | 1.2052  | 0.2294 |
| Creatinine   | 28-day mortality | 0.0323  | 0.0238 | 1.3550  | 0.1754 |
| Creatinine   | 90-day mortality | 0.0069  | 0.0233 | 0.2968  | 0.7666 |
| Creatinine   | Dialysis         | 0.1385  | 0.0456 | 3.0341  | 0.0024 |
| Creatinine   | RRT post         | 0.1183  | 0.0301 | 3.9275  | 0.0001 |
| Creatinine   | RRT prior        | 0.0815  | 0.0299 | 2.7238  | 0.0065 |
| Creatinine   | APACHE II        | 0.2235  | 0.0779 | 2.8697  | 0.0045 |
| Formate      | 28-day mortality | 0.1830  | 0.1829 | 1.0007  | 0.3170 |
| Formate      | 90-day mortality | 0.0828  | 0.1764 | 0.4696  | 0.6386 |
| Formate      | Dialysis         | -0.3343 | 0.6407 | -0.5218 | 0.6018 |
| Formate      | RRT post         | 0.1914  | 0.1829 | 1.0464  | 0.2954 |
| Formate      | RRT prior        | 0.7174  | 0.2624 | 2.7344  | 0.0062 |
| Formate      | APACHE II        | 0.4440  | 0.5959 | 0.7451  | 0.4570 |
| Glucose      | 28-day mortality | 0.0005  | 0.0005 | 0.9182  | 0.3585 |
| Glucose      | 90-day mortality | 0.0005  | 0.0005 | 0.9827  | 0.3258 |
| Glucose      | Dialysis         | -0.0024 | 0.0036 | -0.6535 | 0.5134 |
| Glucose      | RRT post         | 0.0005  | 0.0005 | 0.9211  | 0.3570 |
| Glucose      | RRT prior        | 0.0011  | 0.0006 | 1.6583  | 0.0973 |
| Glucose      | APACHE II        | 0.0015  | 0.0017 | 0.8872  | 0.3759 |
| Glycerol     | 28-day mortality | 0.0185  | 0.0104 | 1.7842  | 0.0744 |
| Glycerol     | 90-day mortality | 0.0140  | 0.0098 | 1.4269  | 0.1536 |
| Glycerol     | Dialysis         | 0.0052  | 0.0230 | 0.2268  | 0.8206 |
| Glycerol     | RRT post         | 0.0303  | 0.0119 | 2.5390  | 0.0111 |
| Glycerol     | RRT prior        | 0.0447  | 0.0153 | 2.9192  | 0.0035 |
| Glycerol     | APACHE II        | 0.0102  | 0.0282 | 0.3629  | 0.7171 |
| Glycine      | 28-day mortality | 0.0280  | 0.0181 | 1.5508  | 0.1210 |
| Glycine      | 90-day mortality | 0.0147  | 0.0175 | 0.8387  | 0.4017 |
| Glycine      | Dialysis         | 0.0269  | 0.0546 | 0.4932  | 0.6218 |
| Glycine      | RRT post         | 0.0465  | 0.0185 | 2.5114  | 0.0120 |
| Glycine      | RRT prior        | 0.0801  | 0.0245 | 3.2672  | 0.0011 |
| Glycine      | APACHE II        | 0.1013  | 0.0591 | 1.7137  | 0.0880 |
| Lactate      | 28-day mortality | 0.0023  | 0.0012 | 1.9007  | 0.0573 |
| Lactate      | 90-day mortality | 0.0013  | 0.0012 | 1.0751  | 0.2823 |
| Lactate      | Dialysis         | -0.0030 | 0.0063 | -0.4768 | 0.6335 |
| Lactate      | RRT post         | 0.0038  | 0.0013 | 2.9352  | 0.0033 |
| Lactate      | RRT prior        | 0.0054  | 0.0015 | 3.5209  | 0.0004 |
| Lactate      | APACHE II        | 0.0070  | 0.0040 | 1.7545  | 0.0807 |
| Leucine      | 28-day mortality | 0.0224  | 0.0211 | 1.0597  | 0.2893 |
| Leucine      | 90-day mortality | 0.0129  | 0.0196 | 0.6586  | 0.5101 |
| Leucine      | Dialysis         | 0.0034  | 0.0638 | 0.0533  | 0.9575 |
| Leucine      | RRT post         | 0.0422  | 0.0279 | 1.5114  | 0.1307 |
| Leucine      | RRT prior        | 0.0261  | 0.0215 | 1.2121  | 0.2255 |
| Leucine      | APACHE II        | 0.0336  | 0.0638 | 0.5273  | 0.5985 |
| Methanol     | 28-day mortality | 0.1182  | 0.0993 | 1.1907  | 0.2338 |
| Methanol     | 90-day mortality | 0.0275  | 0.0974 | 0.2825  | 0.7776 |
| Methanol     | Dialysis         | 0.1090  | 0.2899 | 0.3760  | 0.7069 |
| Methanol     | RRT post         | 0.1775  | 0.1006 | 1.7643  | 0.0777 |
| Methanol     | RRT prior        | 0.2909  | 0.1232 | 2.3607  | 0.0182 |
| Methanol     | APACHE II        | 0.3613  | 0.3298 | 1.0956  | 0.2745 |
| Myo-inositol | 28-day mortality | 0.0309  | 0.0154 | 2.0084  | 0.0446 |

|               |                  |         |        |         |        |
|---------------|------------------|---------|--------|---------|--------|
| Myo-inositol  | 90-day mortality | 0.0106  | 0.0145 | 0.7275  | 0.4669 |
| Myo-inositol  | Dialysis         | 0.0484  | 0.0264 | 1.8366  | 0.0663 |
| Myo-inositol  | RRT post         | 0.0618  | 0.0189 | 3.2768  | 0.0011 |
| Myo-inositol  | RRT prior        | 0.0472  | 0.0177 | 2.6653  | 0.0077 |
| Myo-inositol  | APACHE II        | 0.0688  | 0.0493 | 1.3974  | 0.1640 |
| Phenylalanine | 28-day mortality | 0.0947  | 0.0554 | 1.7094  | 0.0874 |
| Phenylalanine | 90-day mortality | 0.0473  | 0.0535 | 0.8827  | 0.3774 |
| Phenylalanine | Dialysis         | 0.1381  | 0.1328 | 1.0392  | 0.2987 |
| Phenylalanine | RRT post         | 0.2084  | 0.0625 | 3.3371  | 0.0008 |
| Phenylalanine | RRT prior        | 0.2584  | 0.0739 | 3.4979  | 0.0005 |
| Phenylalanine | APACHE II        | 0.3455  | 0.1804 | 1.9149  | 0.0568 |
| Pyruvate      | 28-day mortality | 0.0921  | 0.0345 | 2.6723  | 0.0075 |
| Pyruvate      | 90-day mortality | 0.0738  | 0.0340 | 2.1714  | 0.0299 |
| Pyruvate      | Dialysis         | -0.0341 | 0.1386 | -0.2463 | 0.8054 |
| Pyruvate      | RRT post         | 0.0944  | 0.0348 | 2.7097  | 0.0067 |
| Pyruvate      | RRT prior        | 0.1333  | 0.0387 | 3.4417  | 0.0006 |
| Pyruvate      | APACHE II        | 0.1862  | 0.1043 | 1.7851  | 0.0757 |
| Tyrosine      | 28-day mortality | 0.2013  | 0.0890 | 2.2620  | 0.0237 |
| Tyrosine      | 90-day mortality | 0.1471  | 0.0856 | 1.7188  | 0.0857 |
| Tyrosine      | Dialysis         | 0.0316  | 0.2868 | 0.1101  | 0.9123 |
| Tyrosine      | RRT post         | 0.2186  | 0.0900 | 2.4284  | 0.0152 |
| Tyrosine      | RRT prior        | 0.4206  | 0.1273 | 3.3048  | 0.0010 |
| Tyrosine      | APACHE II        | 0.3806  | 0.2772 | 1.3727  | 0.1712 |
| Valine        | 28-day mortality | -0.0095 | 0.0297 | -0.3205 | 0.7486 |
| Valine        | 90-day mortality | -0.0227 | 0.0284 | -0.7991 | 0.4242 |
| Valine        | Dialysis         | 0.0011  | 0.1028 | 0.0102  | 0.9918 |
| Valine        | RRT post         | 0.0121  | 0.0291 | 0.4146  | 0.6785 |
| Valine        | RRT prior        | 0.0856  | 0.0419 | 2.0401  | 0.0413 |
| Valine        | APACHE II        | -0.0288 | 0.0941 | -0.3056 | 0.7602 |

**Supplementary Table S10.** Metabolite and clinical variable logistic regression (for 28- and 90-day mortality, Dialysis, RRT post and RRT prior randomisation) and linear regression (for APACHE II) results with covariates (patient sex, age, APACHE II\*, admission type (medical or surgical), trial site, and the use of RRT in the 24 hours prior to randomisation). \*APACHE II was not included as a covariate when APACHE II was the outcome of interest

| Metabolite        | Outcome          | Effect  | SE     | Stat    | p-value |
|-------------------|------------------|---------|--------|---------|---------|
| 3-hydroxybutyrate | 28-day mortality | 0.0010  | 0.0053 | 0.1925  | 0.8474  |
| 3-hydroxybutyrate | 90-day mortality | -0.0009 | 0.0051 | -0.1830 | 0.8548  |
| 3-hydroxybutyrate | Dialysis         | -0.0214 | 0.0283 | -0.7580 | 0.4484  |
| 3-hydroxybutyrate | RRT post         | 0.0034  | 0.0058 | 0.5929  | 0.5532  |
| 3-hydroxybutyrate | APACHE II        | -0.0047 | 0.0155 | -0.3054 | 0.7605  |
| Acetate           | 28-day mortality | 0.0440  | 0.1557 | 0.2828  | 0.7773  |
| Acetate           | 90-day mortality | 0.1154  | 0.1666 | 0.6929  | 0.4884  |
| Acetate           | Dialysis         | -0.4555 | 0.5151 | -0.8844 | 0.3765  |
| Acetate           | RRT post         | 0.2093  | 0.2163 | 0.9676  | 0.3332  |
| Acetate           | APACHE II        | 0.4455  | 0.4234 | 1.0521  | 0.2940  |
| Acetoacetate      | 28-day mortality | 0.0061  | 0.0141 | 0.4327  | 0.6652  |
| Acetoacetate      | 90-day mortality | 0.0067  | 0.0136 | 0.4962  | 0.6197  |
| Acetoacetate      | Dialysis         | -0.0185 | 0.0557 | -0.3319 | 0.7400  |
| Acetoacetate      | RRT post         | 0.0065  | 0.0153 | 0.4231  | 0.6722  |
| Acetoacetate      | APACHE II        | -0.0166 | 0.0424 | -0.3925 | 0.6951  |
| Acetone           | 28-day mortality | -0.0079 | 0.0087 | -0.9059 | 0.3650  |
| Acetone           | 90-day mortality | -0.0062 | 0.0076 | -0.8213 | 0.4115  |
| Acetone           | Dialysis         | -0.0526 | 0.0624 | -0.8436 | 0.3989  |
| Acetone           | RRT post         | -0.0057 | 0.0093 | -0.6144 | 0.5390  |
| Acetone           | APACHE II        | 0.0063  | 0.0215 | 0.2950  | 0.7683  |
| Alanine           | 28-day mortality | 0.0225  | 0.0171 | 1.3105  | 0.1900  |
| Alanine           | 90-day mortality | 0.0146  | 0.0168 | 0.8672  | 0.3858  |
| Alanine           | Dialysis         | -0.0464 | 0.0550 | -0.8448 | 0.3982  |
| Alanine           | RRT post         | 0.0275  | 0.0204 | 1.3473  | 0.1779  |

|               |                  |         |        |         |        |
|---------------|------------------|---------|--------|---------|--------|
| Alanine       | APACHE II        | 0.0310  | 0.0482 | 0.6424  | 0.5213 |
| Citrate       | 28-day mortality | 0.0272  | 0.0419 | 0.6487  | 0.5166 |
| Citrate       | 90-day mortality | 0.0266  | 0.0409 | 0.6511  | 0.5150 |
| Citrate       | Dialysis         | -0.2791 | 0.1995 | -1.3991 | 0.1618 |
| Citrate       | RRT post         | 0.1023  | 0.0622 | 1.6438  | 0.1002 |
| Citrate       | APACHE II        | 0.1448  | 0.1215 | 1.1918  | 0.2348 |
| Creatine      | 28-day mortality | 0.0244  | 0.0202 | 1.2068  | 0.2275 |
| Creatine      | 90-day mortality | 0.0016  | 0.0191 | 0.0851  | 0.9322 |
| Creatine      | Dialysis         | -0.1999 | 0.1761 | -1.1350 | 0.2564 |
| Creatine      | RRT post         | 0.0013  | 0.0263 | 0.0503  | 0.9599 |
| Creatine      | APACHE II        | 0.0247  | 0.0575 | 0.4289  | 0.6684 |
| Creatinine    | 28-day mortality | 0.0076  | 0.0262 | 0.2901  | 0.7718 |
| Creatinine    | 90-day mortality | -0.0233 | 0.0262 | -0.8878 | 0.3747 |
| Creatinine    | Dialysis         | 0.1166  | 0.0548 | 2.1282  | 0.0333 |
| Creatinine    | RRT post         | 0.0920  | 0.0321 | 2.8644  | 0.0042 |
| Creatinine    | APACHE II        | 0.1579  | 0.0761 | 2.0735  | 0.0393 |
| Formate       | 28-day mortality | 0.0747  | 0.2064 | 0.3622  | 0.7172 |
| Formate       | 90-day mortality | -0.0206 | 0.1983 | -0.1038 | 0.9173 |
| Formate       | Dialysis         | -0.7612 | 0.5608 | -1.3574 | 0.1747 |
| Formate       | RRT post         | -0.0970 | 0.2431 | -0.3991 | 0.6898 |
| Formate       | APACHE II        | 0.0975  | 0.5741 | 0.1698  | 0.8653 |
| Glucose       | 28-day mortality | 0.0003  | 0.0006 | 0.4723  | 0.6367 |
| Glucose       | 90-day mortality | 0.0004  | 0.0006 | 0.6764  | 0.4988 |
| Glucose       | Dialysis         | -0.0032 | 0.0047 | -0.6777 | 0.4980 |
| Glucose       | RRT post         | 0.0002  | 0.0008 | 0.2640  | 0.7918 |
| Glucose       | APACHE II        | 0.0008  | 0.0017 | 0.5054  | 0.6138 |
| Glycerol      | 28-day mortality | 0.0136  | 0.0118 | 1.1462  | 0.2517 |
| Glycerol      | 90-day mortality | 0.0085  | 0.0112 | 0.7588  | 0.4479 |
| Glycerol      | Dialysis         | -0.0218 | 0.0373 | -0.5835 | 0.5595 |
| Glycerol      | RRT post         | 0.0215  | 0.0150 | 1.4383  | 0.1504 |
| Glycerol      | APACHE II        | -0.0188 | 0.0285 | -0.6592 | 0.5106 |
| Glycine       | 28-day mortality | 0.0145  | 0.0200 | 0.7262  | 0.4677 |
| Glycine       | 90-day mortality | 0.0003  | 0.0194 | 0.0136  | 0.9892 |
| Glycine       | Dialysis         | -0.0341 | 0.0603 | -0.5663 | 0.5712 |
| Glycine       | RRT post         | 0.0191  | 0.0231 | 0.8276  | 0.4079 |
| Glycine       | APACHE II        | 0.0533  | 0.0581 | 0.9173  | 0.3600 |
| Lactate       | 28-day mortality | 0.0015  | 0.0014 | 1.0922  | 0.2747 |
| Lactate       | 90-day mortality | 0.0003  | 0.0013 | 0.2213  | 0.8249 |
| Lactate       | Dialysis         | -0.0089 | 0.0078 | -1.1419 | 0.2535 |
| Lactate       | RRT post         | 0.0025  | 0.0017 | 1.5304  | 0.1259 |
| Lactate       | APACHE II        | 0.0039  | 0.0040 | 0.9758  | 0.3303 |
| Leucine       | 28-day mortality | 0.0179  | 0.0206 | 0.8692  | 0.3847 |
| Leucine       | 90-day mortality | 0.0085  | 0.0198 | 0.4323  | 0.6655 |
| Leucine       | Dialysis         | -0.0586 | 0.0997 | -0.5885 | 0.5562 |
| Leucine       | RRT post         | 0.0280  | 0.0244 | 1.1479  | 0.2510 |
| Leucine       | APACHE II        | 0.0317  | 0.0607 | 0.5223  | 0.6020 |
| Methanol      | 28-day mortality | 0.0865  | 0.1087 | 0.7956  | 0.4262 |
| Methanol      | 90-day mortality | -0.0166 | 0.1070 | -0.1547 | 0.8771 |
| Methanol      | Dialysis         | 0.0380  | 0.3836 | 0.0990  | 0.9211 |
| Methanol      | RRT post         | 0.0643  | 0.1271 | 0.5057  | 0.6130 |
| Methanol      | APACHE II        | 0.2290  | 0.3205 | 0.7145  | 0.4757 |
| Myo-inositol  | 28-day mortality | 0.0240  | 0.0174 | 1.3749  | 0.1692 |
| Myo-inositol  | 90-day mortality | -0.0013 | 0.0163 | -0.0812 | 0.9353 |
| Myo-inositol  | Dialysis         | 0.0199  | 0.0320 | 0.6223  | 0.5337 |
| Myo-inositol  | RRT post         | 0.0541  | 0.0203 | 2.6664  | 0.0077 |
| Myo-inositol  | APACHE II        | 0.0420  | 0.0486 | 0.8643  | 0.3886 |
| Phenylalanine | 28-day mortality | 0.0521  | 0.0627 | 0.8318  | 0.4055 |
| Phenylalanine | 90-day mortality | -0.0020 | 0.0605 | -0.0338 | 0.9731 |

|               |                  |         |        |         |        |
|---------------|------------------|---------|--------|---------|--------|
| Phenylalanine | Dialysis         | -0.0289 | 0.1462 | -0.1979 | 0.8431 |
| Phenylalanine | RRT post         | 0.1393  | 0.0781 | 1.7848  | 0.0743 |
| Phenylalanine | APACHE II        | 0.1872  | 0.1791 | 1.0454  | 0.2970 |
| Pyruvate      | 28-day mortality | 0.0856  | 0.0407 | 2.1017  | 0.0356 |
| Pyruvate      | 90-day mortality | 0.0657  | 0.0400 | 1.6430  | 0.1004 |
| Pyruvate      | Dialysis         | -0.2463 | 0.2665 | -0.9243 | 0.3553 |
| Pyruvate      | RRT post         | 0.0489  | 0.0422 | 1.1573  | 0.2472 |
| Pyruvate      | APACHE II        | 0.1143  | 0.1038 | 1.1007  | 0.2723 |
| Tyrosine      | 28-day mortality | 0.1627  | 0.1027 | 1.5844  | 0.1131 |
| Tyrosine      | 90-day mortality | 0.1058  | 0.0992 | 1.0663  | 0.2863 |
| Tyrosine      | Dialysis         | -0.2680 | 0.3024 | -0.8864 | 0.3754 |
| Tyrosine      | RRT post         | 0.1398  | 0.1169 | 1.1955  | 0.2319 |
| Tyrosine      | APACHE II        | 0.0992  | 0.2762 | 0.3590  | 0.7199 |
| Valine        | 28-day mortality | -0.0223 | 0.0321 | -0.6945 | 0.4873 |
| Valine        | 90-day mortality | -0.0347 | 0.0307 | -1.1303 | 0.2583 |
| Valine        | Dialysis         | -0.0628 | 0.0958 | -0.6556 | 0.5121 |
| Valine        | RRT post         | -0.0076 | 0.0379 | -0.1992 | 0.8421 |
| Valine        | APACHE II        | -0.0902 | 0.0897 | -1.0061 | 0.3155 |

**Supplementary Table S11.** Results of statistical power ( $\alpha=0.05$ ) calculations for metabolite genetic variants to detect an association with a continuous outcome (e.g. APACHE II). Sample size used for statistical power calculations was matched to ADRENAL-GEPS analysis (N=493).

| Metabolite        | MAF  | VAR(SNP) | $\beta_{SNP-metab}$ | $\beta_{metab-outcome}$ | Total QTL variance | Power  |
|-------------------|------|----------|---------------------|-------------------------|--------------------|--------|
| 3-hydroxybutyrate | 0.48 | 0.4992   | 0.6                 | 0.1                     | 0.0018             | 0.1561 |
| 3-hydroxybutyrate | 0.48 | 0.4992   | 0.6                 | 0.2                     | 0.0072             | 0.4706 |
| 3-hydroxybutyrate | 0.48 | 0.4992   | 0.6                 | 0.3                     | 0.0162             | 0.8093 |
| 3-hydroxybutyrate | 0.48 | 0.4992   | 0.6                 | 0.4                     | 0.0288             | 0.9666 |
| 3-hydroxybutyrate | 0.48 | 0.4992   | 0.6                 | 0.5                     | 0.0449             | 0.9974 |
| 3-hydroxybutyrate | 0.48 | 0.4992   | 0.6                 | 0.6                     | 0.0647             | 0.9999 |
| 3-hydroxybutyrate | 0.48 | 0.4992   | 0.6                 | 0.7                     | 0.0881             | 1      |
| 3-hydroxybutyrate | 0.48 | 0.4992   | 0.6                 | 0.8                     | 0.1150             | 1      |
| 3-hydroxybutyrate | 0.48 | 0.4992   | 0.6                 | 0.9                     | 0.1456             | 1      |
| 3-hydroxybutyrate | 0.48 | 0.4992   | 0.6                 | 1                       | 0.1797             | 1      |
| acetoacetate      | 0.97 | 0.0582   | 1.72                | 0.1                     | 0.0017             | 0.1516 |
| acetoacetate      | 0.97 | 0.0582   | 1.72                | 0.2                     | 0.0069             | 0.4546 |
| acetoacetate      | 0.97 | 0.0582   | 1.72                | 0.3                     | 0.0155             | 0.7924 |
| acetoacetate      | 0.97 | 0.0582   | 1.72                | 0.4                     | 0.0275             | 0.96   |
| acetoacetate      | 0.97 | 0.0582   | 1.72                | 0.5                     | 0.0430             | 0.9965 |
| acetoacetate      | 0.97 | 0.0582   | 1.72                | 0.6                     | 0.0620             | 0.9999 |
| acetoacetate      | 0.97 | 0.0582   | 1.72                | 0.7                     | 0.0844             | 1      |
| acetoacetate      | 0.97 | 0.0582   | 1.72                | 0.8                     | 0.1102             | 1      |
| acetoacetate      | 0.97 | 0.0582   | 1.72                | 0.9                     | 0.1395             | 1      |
| acetoacetate      | 0.97 | 0.0582   | 1.72                | 1                       | 0.1722             | 1      |
| creatinine        | 0.49 | 0.4998   | 0.54                | 0.1                     | 0.0015             | 0.1356 |
| creatinine        | 0.49 | 0.4998   | 0.54                | 0.2                     | 0.0058             | 0.3967 |
| creatinine        | 0.49 | 0.4998   | 0.54                | 0.3                     | 0.0131             | 0.7229 |
| creatinine        | 0.49 | 0.4998   | 0.54                | 0.4                     | 0.0233             | 0.9266 |

|            |      |        |      |     |        |        |
|------------|------|--------|------|-----|--------|--------|
| creatinine | 0.49 | 0.4998 | 0.54 | 0.5 | 0.0364 | 0.9898 |
| creatinine | 0.49 | 0.4998 | 0.54 | 0.6 | 0.0525 | 0.9993 |
| creatinine | 0.49 | 0.4998 | 0.54 | 0.7 | 0.0714 | 1      |
| creatinine | 0.49 | 0.4998 | 0.54 | 0.8 | 0.0933 | 1      |
| creatinine | 0.49 | 0.4998 | 0.54 | 0.9 | 0.1181 | 1      |
| creatinine | 0.49 | 0.4998 | 0.54 | 1   | 0.1457 | 1      |

**Supplementary Table S12.** Results of statistical power ( $\alpha=0.05$ ) calculations for metabolite genetic variants to detect an association with a binary outcome (e.g. susceptibility to sepsis). Sample sizes used for statistical power calculations were matched to ADRENAL-GEPS and QIMR controls analysis ( $N_{\text{cases}}=493$ ,  $N_{\text{controls}}=2442$ ).

| Metabolite        | MAF  | VAR(SNP) | $\beta_{\text{SNP-metab}}$ | $\beta_{\text{metab-outcome}}$ | Logistic<br>$\beta_{\text{metab-outcome}}$ | Total QTL<br>variance | Power |
|-------------------|------|----------|----------------------------|--------------------------------|--------------------------------------------|-----------------------|-------|
| 3-hydroxybutyrate | 0.48 | 0.4992   | 0.6                        | 0.01                           | 0.0246                                     | 1.80E-05              | 0.061 |
| 3-hydroxybutyrate | 0.48 | 0.4992   | 0.6                        | 0.05                           | 0.1326                                     | 0.0004                | 0.216 |
| 3-hydroxybutyrate | 0.48 | 0.4992   | 0.6                        | 0.1                            | 0.2612                                     | 0.0018                | 0.568 |
| 3-hydroxybutyrate | 0.48 | 0.4992   | 0.6                        | 0.2                            | 0.5143                                     | 0.0072                | 0.99  |
| 3-hydroxybutyrate | 0.48 | 0.4992   | 0.6                        | 0.3                            | 0.7675                                     | 0.0162                | 1     |
| 3-hydroxybutyrate | 0.48 | 0.4992   | 0.6                        | 0.4                            | 1.0346                                     | 0.0288                | 1     |
| 3-hydroxybutyrate | 0.48 | 0.4992   | 0.6                        | 0.5                            | 1.3217                                     | 0.0449                | 1     |
| 3-hydroxybutyrate | 0.48 | 0.4992   | 0.6                        | 0.6                            | 1.6703                                     | 0.0647                | 1     |
| 3-hydroxybutyrate | 0.48 | 0.4992   | 0.6                        | 0.7                            | 2.1063                                     | 0.0881                | 1     |
| 3-hydroxybutyrate | 0.48 | 0.4992   | 0.6                        | 0.8                            | 2.7655                                     | 0.1150                | 1     |
| acetoacetate      | 0.97 | 0.0582   | 1.72                       | 0.01                           | 0.0275                                     | 1.72E-05              | 0.069 |
| acetoacetate      | 0.97 | 0.0582   | 1.72                       | 0.05                           | 0.1300                                     | 0.0004                | 0.245 |
| acetoacetate      | 0.97 | 0.0582   | 1.72                       | 0.1                            | 0.2619                                     | 0.0017                | 0.693 |
| acetoacetate      | 0.97 | 0.0582   | 1.72                       | 0.2                            | 0.5250                                     | 0.0069                | 1     |
| acetoacetate      | 0.97 | 0.0582   | 1.72                       | 0.3                            | 0.7927                                     | 0.0155                | 1     |
| acetoacetate      | 0.97 | 0.0582   | 1.72                       | 0.4                            | 1.0783                                     | 0.0275                | 1     |
| acetoacetate      | 0.97 | 0.0582   | 1.72                       | 0.5                            | 1.3954                                     | 0.0430                | 1     |
| acetoacetate      | 0.97 | 0.0582   | 1.72                       | 0.6                            | 1.7660                                     | 0.0620                | 1     |
| acetoacetate      | 0.97 | 0.0582   | 1.72                       | 0.7                            | 2.2479                                     | 0.0844                | 1     |
| acetoacetate      | 0.97 | 0.0582   | 1.72                       | 0.8                            | 2.9628                                     | 0.1102                | 1     |
| creatinine        | 0.49 | 0.4998   | 0.54                       | 0.01                           | 0.0275                                     | 1.46E-05              | 0.052 |
| creatinine        | 0.49 | 0.4998   | 0.54                       | 0.05                           | 0.1294                                     | 0.0004                | 0.177 |
| creatinine        | 0.49 | 0.4998   | 0.54                       | 0.1                            | 0.2613                                     | 0.0015                | 0.529 |
| creatinine        | 0.49 | 0.4998   | 0.54                       | 0.2                            | 0.5172                                     | 0.0058                | 0.972 |
| creatinine        | 0.49 | 0.4998   | 0.54                       | 0.3                            | 0.7780                                     | 0.0131                | 1     |
| creatinine        | 0.49 | 0.4998   | 0.54                       | 0.4                            | 1.0450                                     | 0.0233                | 1     |
| creatinine        | 0.49 | 0.4998   | 0.54                       | 0.5                            | 1.3407                                     | 0.0364                | 1     |
| creatinine        | 0.49 | 0.4998   | 0.54                       | 0.6                            | 1.6865                                     | 0.0525                | 1     |
| creatinine        | 0.49 | 0.4998   | 0.54                       | 0.7                            | 2.1285                                     | 0.0714                | 1     |
| creatinine        | 0.49 | 0.4998   | 0.54                       | 0.8                            | 2.8027                                     | 0.0933                | 1     |



## Supplementary References

- Chambers, J. C., Zhang, W., Lord, G. M., van der Harst, P., Lawlor, D. A., Sehmi, J. S., Gale, D. P., Wass, M. N., Ahmadi, K. R., Bakker, S. J. L., Beckmann, J., Bilo, H. J. G., Bochud, M., Brown, M. J., Caulfield, M. J., Connell, J. M. C., Cook, H. T., Cotlarciuc, I., Smith, G. D., . . . Kooner, J. S. (2010). Genetic loci influencing kidney function and chronic kidney disease. *Nature Genetics*, *42*(5), 373-375. <https://doi.org/10.1038/ng.566>
- Demirkan, A., Henneman, P., Verhoeven, A., Dharuri, H., Amin, N., Klinken, J. B., Karszen, L., Stam, A., Meissner, A., Goral, S., Maagdenberg, A., Deelder, A., Hoen, P., Duijn, C., & Willems van Dijk, K. (2015). Insight in Genome-Wide Association of Metabolite Quantitative Traits by Exome Sequence Analyses. *PLoS Genet*, *11*(1), e1004835-e1004835. <https://doi.org/10.1371/journal.pgen.1004835>
- Gorski, M., van der Most, P. J., Teumer, A., Chu, A. Y., Li, M., Mijatovic, V., Nolte, I. M., Cocca, M., Taliun, D., Gomez, F., Li, Y., Tayo, B., Tin, A., Feitosa, M. F., Aspelund, T., Attia, J., Biffar, R., Bochud, M., Boerwinkle, E., . . . Fuchsberger, C. (2017). 1000 Genomes-based meta-analysis identifies 10 novel loci for kidney function. *Scientific Reports*, *7*(1), 45040. <https://doi.org/10.1038/srep45040>
- Graham, S. E., Nielsen, J. B., Zawistowski, M., Zhou, W., Fritsche, L. G., Gabrielsen, M. E., Skogholt, A. H., Surakka, I., Hornsby, W. E., Fermin, D., Larach, D. B., Kheterpal, S., Brummett, C. M., Lee, S., Kang, H. M., Abecasis, G. R., Romundstad, S., Hallan, S., Sampson, M. G., . . . Willer, C. J. (2019). Sex-specific and pleiotropic effects underlying kidney function identified from GWAS meta-analysis. *Nature Communications*, *10*(1), 1847. <https://doi.org/10.1038/s41467-019-09861-z>
- Hishida, A., Nakatochi, M., Akiyama, M., Kamatani, Y., Nishiyama, T., Ito, H., Oze, I., Nishida, Y., Hara, M., Takashima, N., Turin, Tanvir C., Watanabe, M., Suzuki, S., Ibusuki, R., Shimoshikiryo, I., Nakamura, Y., Mikami, H., Ikezaki, H., Furusyo, N., . . . Wakai, K. (2018). Genome-Wide Association Study of Renal Function Traits: Results from the Japan Multi-Institutional Collaborative Cohort Study. *Am J Nephrol*, *47*(5), 304-316. <https://doi.org/10.1159/000488946>
- Kanai, M., Akiyama, M., Takahashi, A., Matoba, N., Momozawa, Y., Ikeda, M., Iwata, N., Ikegawa, S., Hirata, M., Matsuda, K., Kubo, M., Okada, Y., & Kamatani, Y. (2018). Genetic analysis of quantitative traits in the Japanese population links cell types to complex human diseases. *Nature Genetics*, *50*(3), 390-400. <https://doi.org/10.1038/s41588-018-0047-6>
- Köttgen, A., Pattaro, C., Böger, C. A., Fuchsberger, C., Olden, M., Glazer, N. L., Parsa, A., Gao, X., Yang, Q., Smith, A. V., O'Connell, J. R., Li, M., Schmidt, H., Tanaka, T., Isaacs, A., Ketkar, S., Hwang, S.-J., Johnson, A. D., Dehghan, A., . . . Fox, C. S. (2010). New loci associated with kidney function and chronic kidney disease. *Nature Genetics*, *42*(5), 376-384. <https://doi.org/10.1038/ng.568>
- Nagy, R., Boutin, T. S., Marten, J., Huffman, J. E., Kerr, S. M., Campbell, A., Evenden, L., Gibson, J., Amador, C., Howard, D. M., Navarro, P., Morris, A., Deary, I. J., Hocking, L. J., Padmanabhan, S., Smith, B. H., Joshi, P., Wilson, J. F., Hastie, N. D., . . . Hayward, C. (2017). Exploration of haplotype research consortium imputation for genome-wide association studies in 20,032 Generation Scotland participants. *Genome Medicine*, *9*(1), 23. <https://doi.org/10.1186/s13073-017-0414-4>
- Pattaro, C., Teumer, A., Gorski, M., Chu, A. Y., Li, M., Mijatovic, V., Garnaas, M., Tin, A., Sorice, R., Li, Y., Taliun, D., Olden, M., Foster, M., Yang, Q., Chen, M. H., Pers, T. H.,

- Johnson, A. D., Ko, Y. A., Fuchsberger, C., . . . Fox, C. S. (2016). Genetic associations at 53 loci highlight cell types and biological pathways relevant for kidney function. *Nat Commun*, 7, 10023. <https://doi.org/10.1038/ncomms10023>
- Rhee, E. P., Ho, J. E., Chen, M. H., Shen, D., Cheng, S., Larson, M. G., Ghorbani, A., Shi, X., Helenius, I. T., O'Donnell, C. J., Souza, A. L., Deik, A., Pierce, K. A., Bullock, K., Walford, G. A., Vasan, R. S., Florez, J. C., Clish, C., Yeh, J. R., . . . Gerszten, R. E. (2013). A genome-wide association study of the human metabolome in a community-based cohort. *Cell Metab*, 18(1), 130-143. <https://doi.org/10.1016/j.cmet.2013.06.013>
- Sinnott-Armstrong, N., Tanigawa, Y., Amar, D., Mars, N., Benner, C., Aguirre, M., Venkataraman, G. R., Wainberg, M., Ollila, H. M., Kiiskinen, T., Havulinna, A. S., Pirruccello, J. P., Qian, J., Shcherbina, A., Rodriguez, F., Assimes, T. L., Agarwala, V., Tibshirani, R., Hastie, T., . . . Rivas, M. A. (2021). Genetics of 35 blood and urine biomarkers in the UK Biobank. *Nat Genet*, 53(2), 185-194. <https://doi.org/10.1038/s41588-020-00757-z>
- Stafford-Smith, M., Li, Y. J., Mathew, J. P., Li, Y. W., Ji, Y., Phillips-Bute, B. G., Milano, C. A., Newman, M. F., Kraus, W. E., Kertai, M. D., Shah, S. H., & Podgoreanu, M. V. (2015). Genome-wide association study of acute kidney injury after coronary bypass graft surgery identifies susceptibility loci. *Kidney Int*, 88(4), 823-832. <https://doi.org/10.1038/ki.2015.161>
- Van Driest, S. L., McGregor, T. L., Velez Edwards, D. R., Saville, B. R., Kitchner, T. E., Hebring, S. J., Brilliant, M., Jouni, H., Kullo, I. J., Creech, C. B., Kannankeril, P. J., Vear, S. I., Brothers, K. B., Bowton, E. A., Shaffer, C. M., Patel, N., Delaney, J. T., Bradford, Y., Wilson, S., . . . Denny, J. C. (2015). Genome-Wide Association Study of Serum Creatinine Levels during Vancomycin Therapy. *PLoS ONE*, 10(6), e0127791. <https://doi.org/10.1371/journal.pone.0127791>
- Venkatesh, B., Finfer, S., Cohen, J., Rajbhandari, D., Arabi, Y., Bellomo, R., Billot, L., Correa, M., Glass, P., Harward, M., Joyce, C., Li, Q., McArthur, C., Perner, A., Rhodes, A., Thompson, K., Webb, S., & Myburgh, J. (2018). Adjunctive Glucocorticoid Therapy in Patients with Septic Shock. *N Engl J Med*, 378(9), 797-808. <https://doi.org/10.1056/NEJMoa1705835>
- Williams, S. R., Hsu, F.-C., Keene, K. L., Chen, W.-M., Nelson, S., Southerland, A. M., Madden, E. B., Coull, B., Gogarten, S. M., Furie, K. L., Dzhivhuho, G., Rowles, J. L., Mehndiratta, P., Malik, R., Dupuis, J., Lin, H., Seshadri, S., Rich, S. S., Sale, M. M., & Worrall, B. B. (2016). Shared genetic susceptibility of vascular-related biomarkers with ischemic and recurrent stroke. *Neurology*, 86(4), 351-359. <https://doi.org/10.1212/WNL.0000000000002319>
- Yasukochi, Y., Sakuma, J., Takeuchi, I., Kato, K., Oguri, M., Fujimaki, T., Horibe, H., & Yamada, Y. (2018). Identification of CDC42BPG as a novel susceptibility locus for hyperuricemia in a Japanese population. *Mol Genet Genomics*, 293(2), 371-379. <https://doi.org/10.1007/s00438-017-1394-1>
